# Supplementary material for: Mass Spectrometry-Based Metabolomics Analysis of Obese Patients’ Blood Plasma
Source: PubMed Central journal article supplement (PMC7014187; doi:10.3390/ijms21020568), 2020-01-15
Supplement: ijms-21-00568-s001.pdf [file ijms-21-00568-s001.pdf]

# Mass spectrometry-based metabolomics analysis of obese patients' blood plasma

## (supplementary materials)

Table S1. Study cohort characteristics.

| Group           | Body height<br>(cm) | Body weight<br>(kg) | Age<br>(years) | BMI  | Gender |
|-----------------|---------------------|---------------------|----------------|------|--------|
| Normal          | 162.0               | 64.0                | 34.0           | 24.4 | female |
|                 | 183.0               | 68.0                | 39.0           | 19.0 | female |
|                 | 168.0               | 62.0                | 32.0           | 22.0 | female |
|                 | 164.0               | 49.0                | 28.0           | 18.2 | female |
|                 | 162.0               | 58.0                | 32.0           | 22.1 | female |
|                 | 159.0               | 53.9                | 31.0           | 21.3 | female |
|                 | 176.0               | 65.0                | 38.0           | 21.0 | female |
|                 | 167.0               | 59.2                | 23.0           | 21.2 | female |
|                 | 173.0               | 68.2                | 31.0           | 22.8 | female |
|                 | 170.5               | 63.3                | 28.0           | 21.8 | female |
|                 | 186.0               | 89.0                | 36.0           | 25.7 | male   |
|                 | 178.0               | 69.0                | 32.0           | 21.8 | male   |
|                 | 179.0               | 71.0                | 23.0           | 22.2 | male   |
|                 | 184.0               | 71.0                | 25.0           | 21.0 | male   |
|                 | 167.6               | 67.0                | 35.0           | 23.9 | male   |
|                 | 174.6               | 66.0                | 25.0           | 21.6 | male   |
|                 | 177.8               | 68.5                | 43.0           | 21.7 | male   |
|                 | 179.4               | 79.9                | 27.0           | 24.8 | male   |
|                 | 184.0               | 83.4                | 28.0           | 24.6 | male   |
| 175.1           | 62.0                | 36.0                | 20.2           | male |        |
| <i>mean</i>     | 173.5               | 66.9                | 31.3           | 22.1 |        |
| <i>st. dev.</i> | 8.2                 | 9.4                 | 5.5            | 1.9  |        |
| Overweight      | 158.0               | 72.0                | 30.0           | 28.8 | female |
|                 | 165.0               | 81.0                | 28.0           | 29.8 | female |
|                 | 161.8               | 69.3                | 32.0           | 26.5 | female |
|                 | 168.0               | 74.4                | 22.0           | 26.2 | female |
|                 | 176.4               | 82.0                | 44.0           | 26.3 | female |
|                 | 150.0               | 57.8                | 26.0           | 25.7 | female |
|                 | 175.4               | 84.4                | 27.0           | 27.4 | female |
|                 | 162.0               | 70.3                | 42.0           | 26.8 | female |
|                 | 164.0               | 74.0                | 44.0           | 27.5 | female |
|                 | 156.8               | 64.3                | 32.0           | 26.1 | female |
|                 | 172.0               | 87.4                | 38.0           | 29.5 | male   |
|                 | 188.0               | 91.0                | 40.0           | 25.7 | male   |
|                 | 190.0               | 105.0               | 29.0           | 29.0 | male   |
|                 | 173.0               | 80.0                | 37.0           | 26.7 | male   |
|                 | 178.6               | 86.8                | 42.0           | 27.2 | male   |
|                 | 184.4               | 90.5                | 31.0           | 26.6 | male   |
|                 | 182.8               | 91.4                | 31.0           | 27.3 | male   |
|                 | 175.0               | 87.0                | 28.0           | 28.4 | male   |
|                 | 164.7               | 77.8                | 28.0           | 28.7 | male   |
| 196.0           | 113.3               | 27.0                | 29.5           | male |        |
| <i>mean</i>     | 172.1               | 82.0                | 32.9           | 27.5 |        |

|                 |       |       |      |      |        |
|-----------------|-------|-------|------|------|--------|
| <i>st. dev.</i> | 12.2  | 13.1  | 6.7  | 1.3  |        |
|                 | 165.0 | 95.0  | 36.0 | 34.9 | female |
|                 | 145.0 | 73.0  | 40.0 | 34.7 | female |
|                 | 161.0 | 82.6  | 45.0 | 31.9 | female |
|                 | 162.8 | 91.2  | 34.0 | 34.4 | female |
|                 | 154.0 | 72.1  | 42.0 | 30.4 | female |
|                 | 168.7 | 96.7  | 20.0 | 34.0 | female |
|                 | 159.5 | 76.8  | 41.0 | 30.2 | female |
|                 | 174.0 | 100.0 | 27.0 | 33.0 | female |
|                 | 156.0 | 82.2  | 20.0 | 33.8 | female |
| Stage 1 obesity | 171.9 | 90.1  | 25.0 | 30.5 | female |
|                 | 178.2 | 110.1 | 29.0 | 34.7 | male   |
|                 | 187.0 | 119.6 | 29.0 | 34.3 | male   |
|                 | 179.0 | 96.5  | 26.0 | 30.1 | male   |
|                 | 183.2 | 108.0 | 18.0 | 32.2 | male   |
|                 | 182.0 | 110.2 | 30.0 | 33.3 | male   |
|                 | 172.0 | 92.0  | 31.0 | 31.1 | male   |
|                 | 180.0 | 106.0 | 32.0 | 32.7 | male   |
|                 | 185.1 | 109.5 | 19.0 | 32.0 | male   |
|                 | 165.0 | 83.4  | 25.0 | 30.6 | male   |
|                 | 182.1 | 106.4 | 25.0 | 32.1 | male   |
| <i>mean</i>     | 170.6 | 95.1  | 29.7 | 32.5 |        |
| <i>st. dev.</i> | 11.7  | 13.7  | 8.0  | 1.7  |        |
|                 | 168.0 | 112.3 | 26.0 | 39.8 | female |
|                 | 163.0 | 96.5  | 38.0 | 36.3 | female |
|                 | 166.0 | 101.1 | 34.0 | 36.7 | female |
|                 | 160.0 | 91.9  | 18.0 | 35.9 | female |
|                 | 168.0 | 106.4 | 36.0 | 37.7 | female |
|                 | 168.7 | 100.0 | 23.0 | 35.1 | female |
|                 | 171.0 | 112.0 | 45.0 | 38.3 | female |
|                 | 167.0 | 104.0 | 33.0 | 37.3 | female |
|                 | 164.6 | 101.7 | 41.0 | 37.5 | female |
| Stage 2 obesity | 171.8 | 105.5 | 33.0 | 35.8 | female |
|                 | 179.5 | 122.2 | 23.0 | 37.9 | male   |
|                 | 187.0 | 133.8 | 25.0 | 38.3 | male   |
|                 | 181.2 | 116.9 | 29.0 | 35.6 | male   |
|                 | 165.0 | 98.2  | 42.0 | 36.1 | male   |
|                 | 165.0 | 99.3  | 39.0 | 36.5 | male   |
|                 | 186.8 | 126.1 | 43.0 | 36.1 | male   |
|                 | 167.8 | 100.9 | 21.0 | 35.8 | male   |
|                 | 158.0 | 88.9  | 32.0 | 35.6 | male   |
|                 | 187.0 | 131.0 | 33.0 | 37.5 | male   |
|                 | 185.0 | 133.8 | 42.0 | 39.1 | male   |
| <i>mean</i>     | 171.5 | 109.1 | 32.8 | 36.9 |        |
| <i>st. dev.</i> | 9.4   | 13.8  | 8.1  | 1.3  |        |
|                 | 164.0 | 113.0 | 41.0 | 42.0 | female |
|                 | 162.7 | 118.5 | 38.0 | 44.8 | female |
|                 | 155.0 | 104.0 | 39.0 | 43.3 | female |
|                 | 171.8 | 120.8 | 39.0 | 40.9 | female |
|                 | 152.7 | 97.5  | 32.0 | 41.8 | female |
|                 | 169.1 | 116.8 | 36.0 | 40.9 | female |
| Stage 3 obesity | 165.2 | 114.0 | 37.0 | 41.8 | female |
|                 | 167.7 | 140.9 | 45.0 | 50.1 | female |
|                 | 172.2 | 133.1 | 31.0 | 44.9 | female |
|                 | 175.3 | 175.7 | 36.0 | 57.5 | female |
|                 | 176.2 | 133.9 | 22.0 | 43.1 | male   |
|                 | 177.0 | 193.0 | 36.0 | 64.2 | male   |
|                 | 179.0 | 151.0 | 34.0 | 48.4 | male   |
|                 | 184.0 | 183.0 | 34.0 | 54.1 | male   |

|                 |       |       |      |      |      |
|-----------------|-------|-------|------|------|------|
|                 | 167.0 | 137.0 | 28.0 | 49.1 | male |
|                 | 173.8 | 159.1 | 40.0 | 52.7 | male |
|                 | 186.1 | 153.2 | 29.0 | 44.2 | male |
|                 | 192.6 | 172.5 | 41.0 | 46.5 | male |
|                 | 173.0 | 137.7 | 33.0 | 46.1 | male |
|                 | 181.6 | 165.6 | 18.0 | 50.2 | male |
| <i>mean</i>     | 172.3 | 141.0 | 34.5 | 47.3 |      |
| <i>st. dev.</i> | 9.9   | 27.4  | 6.5  | 6.1  |      |

**Table S2.** Statistical data for mass peak intensities for altered metabolites in steroidogenesis pathway (data for Normal and obesity stage 3 are presented).

| KEGG<br>ID | m/z     | Normal |          | Stage 3 obesity |          |
|------------|---------|--------|----------|-----------------|----------|
|            |         | mean   | st. dev. | mean            | st. dev. |
| C00280*    | 287.196 | 1.69   | 0.94     | 0.71            | 0.52     |
| C00410     | 309.217 | 17.65  | 5.65     | 8.64            | 1.72     |
| C00410     | 345.236 | 6.91   | 0.86     | 3.76            | 1.48     |
| C00410     | 101.119 | 3.31   | 0.56     | 1.85            | 0.42     |
| C00410     | 339.192 | 11.30  | 2.45     | 6.28            | 1.21     |
| C00410     | 322.185 | 1.15   | 0.37     | 0.48            | 0.20     |
| C00410     | 310.222 | 4.22   | 1.42     | 2.02            | 0.25     |
| C00410     | 324.201 | 2.09   | 0.50     | 1.16            | 0.45     |
| C00410     | 140.104 | 1.01   | 0.33     | 0.46            | 0.16     |
| C00410     | 321.181 | 4.55   | 1.53     | 2.12            | 0.30     |
| C00410     | 327.228 | 88.11  | 23.11    | 50.17           | 10.84    |
| C00410     | 329.243 | 19.85  | 6.83     | 9.74            | 2.21     |
| C00410     | 341.207 | 25.28  | 6.19     | 13.25           | 1.65     |
| C00410     | 355.188 | 4.86   | 0.49     | 2.96            | 0.68     |
| C00410     | 315.229 | 5.16   | 1.75     | 2.74            | 0.59     |
| C00410     | 323.197 | 8.49   | 2.18     | 4.59            | 0.80     |
| C00410     | 330.246 | 4.77   | 1.91     | 2.01            | 0.39     |
| C00410     | 326.216 | 7.07   | 2.94     | 3.48            | 0.99     |
| C00410     | 328.232 | 19.58  | 5.42     | 10.97           | 2.22     |
| C00410     | 342.209 | 6.05   | 1.96     | 2.95            | 0.31     |
| C00410     | 325.212 | 30.88  | 12.43    | 16.07           | 5.21     |
| C00410     | 100.112 | 2.47   | 1.29     | 0.90            | 0.46     |
| C00410     | 122.096 | 9.95   | 3.83     | 5.50            | 1.62     |
| C00410     | 235.238 | 0.36   | 0.18     | 0.24            | 0.07     |
| C00410     | 86.096  | 14.27  | 8.78     | 4.63            | 2.06     |
| C00410     | 123.099 | 0.96   | 0.44     | 0.48            | 0.16     |
| C00468     | 283.222 | 0.29   | 0.82     | 0.74            | 0.94     |
| C00523     | 313.209 | 11.24  | 4.86     | 3.77            | 1.10     |
| C00523     | 359.215 | 13.45  | 5.57     | 5.15            | 1.20     |
| C00523     | 273.22  | 0.79   | 0.35     | 0.27            | 0.33     |
| C00523     | 387.249 | 4.39   | 2.73     | 0.91            | 0.56     |
| C00523     | 364.32  | 0.63   | 0.16     | 0.26            | 0.36     |
| C00523     | 357.202 | 11.58  | 5.03     | 6.60            | 7.89     |
| C00523     | 291.23  | 1.27   | 0.80     | 0.43            | 0.53     |
| C00535     | 361.27  | 2.85   | 0.86     | 1.08            | 0.79     |
| C00535     | 285.22  | 2.37   | 0.51     | 1.25            | 0.39     |
| C00535     | 288.239 | 1.83   | 0.48     | 1.00            | 0.24     |
| C00535     | 135.08  | 0.94   | 0.39     | 0.42            | 0.10     |
| C00535     | 345.208 | 6.90   | 3.42     | 2.31            | 0.76     |
| C00535     | 287.236 | 6.32   | 1.27     | 3.80            | 0.72     |
| C00535     | 233.151 | 1.48   | 0.83     | 0.52            | 0.22     |
| C00535     | 289.214 | 1.53   | 0.68     | 0.64            | 0.26     |
| C00535     | 289.251 | 2.05   | 0.66     | 1.14            | 0.34     |
| C00535     | 290.255 | 0.56   | 0.28     | 0.31            | 0.12     |

|        |         |       |      |      |      |
|--------|---------|-------|------|------|------|
| C00535 | 275.236 | 0.48  | 0.25 | 0.20 | 0.13 |
| C00535 | 286.222 | 0.67  | 0.15 | 0.47 | 0.17 |
| C00581 | 118.064 | 0.71  | 0.53 | 0.13 | 0.11 |
| C00674 | 289.214 | 1.53  | 0.68 | 0.64 | 0.26 |
| C00674 | 311.195 | 4.01  | 2.32 | 1.38 | 0.68 |
| C00674 | 311.195 | 4.01  | 2.32 | 1.38 | 0.68 |
| C00735 | 290.213 | 0.58  | 0.33 | 0.17 | 0.09 |
| C00735 | 330.206 | 2.06  | 1.15 | 0.69 | 0.33 |
| C00735 | 211.128 | 0.78  | 0.48 | 0.26 | 0.11 |
| C00735 | 391.221 | 3.21  | 2.20 | 0.72 | 0.71 |
| C00762 | 361.205 | 4.22  | 2.42 | 1.09 | 0.95 |
| C00762 | 479.33  | 15.17 | 9.75 | 4.21 | 1.89 |
| C00951 | 281.151 | 1.55  | 0.38 | 0.57 | 0.44 |
| C00951 | 307.201 | 1.99  | 0.00 | 1.30 | 0.00 |
| C00951 | 311.233 | 4.86  | 1.66 | 2.30 | 1.33 |
| C00951 | 295.165 | 1.71  | 0.81 | 0.63 | 0.32 |
| C00956 | 112.051 | 0.35  | 0.49 | 0.06 | 0.15 |
| C01176 | 353.208 | 4.34  | 2.63 | 1.13 | 0.61 |
| C01227 | 289.214 | 1.53  | 0.68 | 0.64 | 0.26 |
| C01227 | 311.195 | 4.01  | 2.32 | 1.38 | 0.68 |
| C01780 | 361.205 | 4.22  | 2.42 | 1.09 | 0.95 |
| C01953 | 895.302 | 0.17  | 0.39 | 0.18 | 0.15 |
| C02140 | 313.141 | 0.85  | 0.30 | 0.21 | 0.27 |
| C02140 | 283.171 | 1.92  | 0.96 | 0.66 | 0.40 |
| C02140 | 361.233 | 5.25  | 2.63 | 1.90 | 0.63 |
| C02140 | 333.239 | 2.27  | 1.25 | 0.69 | 0.44 |
| C02140 | 347.217 | 2.86  | 1.64 | 0.93 | 0.75 |
| C03205 | 353.208 | 4.34  | 2.63 | 1.13 | 0.61 |
| C03772 | 289.214 | 1.53  | 0.68 | 0.64 | 0.26 |
| C03772 | 311.195 | 4.01  | 2.32 | 1.38 | 0.68 |
| C03917 | 313.209 | 11.24 | 4.86 | 3.77 | 1.10 |
| C03917 | 291.23  | 1.27  | 0.80 | 0.43 | 0.53 |
| C04295 | 313.209 | 11.24 | 4.86 | 3.77 | 1.10 |
| C04295 | 291.23  | 1.27  | 0.80 | 0.43 | 0.53 |
| C04373 | 313.209 | 11.24 | 4.86 | 3.77 | 1.10 |
| C04373 | 291.23  | 1.27  | 0.80 | 0.43 | 0.53 |
| C04392 | 666.259 | 0.71  | 1.39 | 0.62 | 0.27 |
| C05138 | 451.353 | 1.99  | 1.13 | 0.65 | 0.45 |
| C05138 | 491.293 | 4.42  | 2.93 | 0.98 | 0.66 |
| C05138 | 348.218 | 1.15  | 0.68 | 0.35 | 0.35 |
| C05139 | 305.209 | 2.27  | 1.38 | 0.83 | 0.41 |
| C05141 | 335.162 | 1.99  | 0.76 | 0.60 | 0.57 |
| C05141 | 336.169 | 0.72  | 0.37 | 0.16 | 0.22 |
| C05141 | 284.206 | 0.51  | 0.12 | 0.25 | 0.16 |
| C05141 | 111.064 | 0.30  | 0.03 | 0.18 | 0.09 |
| C05141 | 437.334 | 1.78  | 0.53 | 0.81 | 0.69 |
| C05141 | 283.204 | 1.64  | 0.45 | 0.74 | 0.67 |
| C05141 | 297.219 | 1.17  | 0.14 | 0.70 | 0.44 |
| C05141 | 280.19  | 0.53  | 0.26 | 0.13 | 0.20 |
| C05141 | 313.176 | 2.09  | 1.17 | 0.63 | 0.60 |
| C05141 | 293.176 | 2.07  | 1.62 | 0.52 | 0.63 |
| C05291 | 305.209 | 2.27  | 1.38 | 0.83 | 0.41 |
| C05293 | 313.209 | 11.24 | 4.86 | 3.77 | 1.10 |
| C05293 | 291.23  | 1.27  | 0.80 | 0.43 | 0.53 |
| C05294 | 305.209 | 2.27  | 1.38 | 0.83 | 0.41 |
| C05472 | 368.249 | 1.73  | 1.07 | 0.46 | 0.23 |
| C05476 | 183.113 | 0.27  | 0.00 | 0.20 | 0.00 |
| C05477 | 347.217 | 2.86  | 1.64 | 0.93 | 0.75 |
| C05480 | 341.241 | 8.58  | 3.47 | 2.87 | 1.53 |
| C05480 | 342.246 | 2.20  | 0.79 | 1.06 | 0.71 |
| C05480 | 360.219 | 3.78  | 2.02 | 1.77 | 0.34 |
| C05485 | 333.239 | 2.27  | 1.25 | 0.69 | 0.44 |

---

|        |         |      |      |      |      |
|--------|---------|------|------|------|------|
| C05488 | 347.217 | 2.86 | 1.64 | 0.93 | 0.75 |
| C05490 | 345.208 | 6.90 | 3.42 | 2.31 | 0.76 |
| C05490 | 355.218 | 7.92 | 3.77 | 2.79 | 0.62 |
| C05497 | 347.217 | 2.86 | 1.64 | 0.93 | 0.75 |
| C05498 | 353.208 | 4.34 | 2.63 | 1.13 | 0.61 |
| C13712 | 341.241 | 8.58 | 3.47 | 2.87 | 1.53 |
| C13712 | 342.246 | 2.20 | 0.79 | 1.06 | 0.71 |

## \* Metabolite names

|        |                             |        |                                          |
|--------|-----------------------------|--------|------------------------------------------|
| C00280 | Androstenedione             | C04295 | Androstenediol                           |
| C00410 | Progesterone                | C04373 | Etiocholanolone                          |
| C00468 | Estrone                     | C04392 | P1,P4-Bis(5'-xanthosyl) tetraphosphate   |
| C00523 | Androsterone                | C05138 | 17alpha-Hydroxypregnenolone              |
| C00535 | Testosterone                | C05139 | 16alpha-Hydroxydehydroepiandrosterone    |
| C00581 | Guanidinoacetate            | C05141 | Estriol                                  |
| C00674 | Androstenedione             | C05291 | 7alpha-Hydroxytestosterone               |
| C00735 | Cortisol                    | C05293 | 5beta-Dihydrotestosterone                |
| C00762 | Cortisone                   | C05294 | 19-Hydroxytestosterone                   |
| C00951 | Estradiol                   | C05472 | Urocortisol                              |
| C00956 | L-2-Aminoadipate            | C05476 | Tetrahydrocorticosterone                 |
| C01176 | 17alpha-Hydroxyprogesterone | C05477 | 21-Hydroxy-5beta-pregnane-3,11,20-trione |
| C01227 | Dehydroepiandrosterone      | C05480 | Pregnanolone                             |
| C01780 | Aldosterone                 | C05485 | 21-Hydroxypregnenolone                   |
| C01953 | Pregnenolone                | C05488 | 11-Deoxycortisol; Cortodoxone            |
| C02140 | Corticosterone              | C05490 | 11-Dehydrocorticosterone                 |
| C03205 | 11-Deoxycorticosterone      | C05497 | 21-Deoxycortisol                         |
| C03772 | 5beta-Androstane-3,17-dione | C05498 | 11beta-Hydroxyprogesterone               |
| C03917 | Dihydrotestosterone         | C13712 | Allopregnanolone                         |

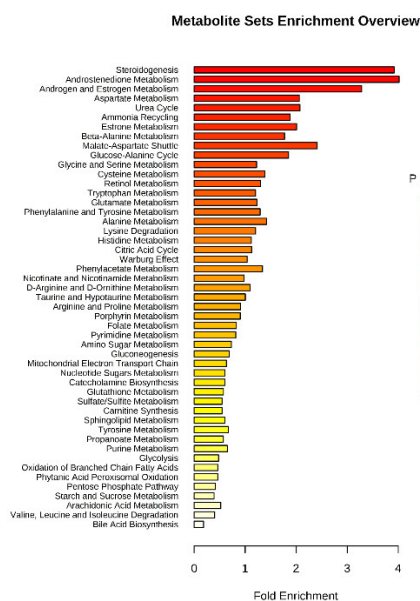

**Figure S1.** Summary plot for over-representation analysis (ORA) of blood plasma metabolites with an abnormal concentration in overweight males and females. Other ORA related data is presented in Table S3. Supportive information Figures S1-S12 were generated by MetaboAnalyst.

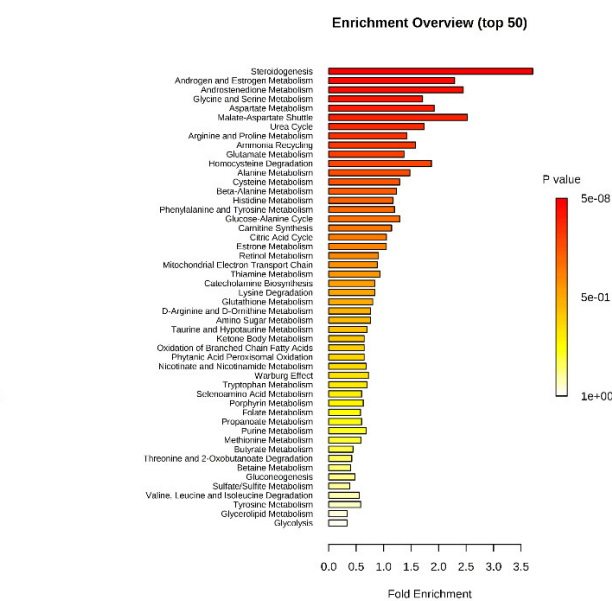

**Figure S3.** Summary plot for over-representation analysis (ORA) of blood plasma metabolites with an abnormal concentration in obese patients (stage 2 obesity in males and females). Other ORA related data is presented in Table S5.

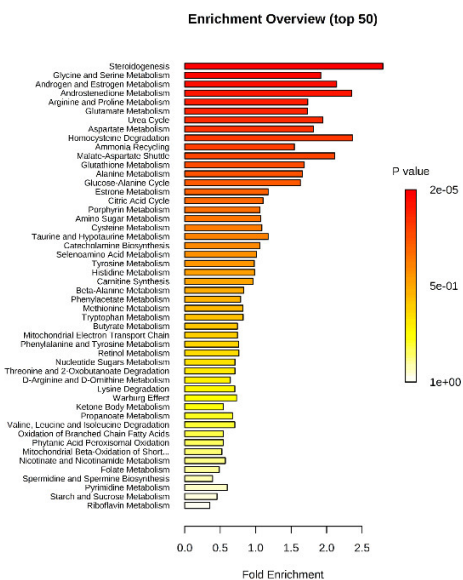

**Figure S2.** Summary plot for over-representation analysis (ORA) of blood plasma metabolites with an abnormal concentration in obese patients (stage 1 obesity in males and females). Other ORA related data is presented in Table S4.

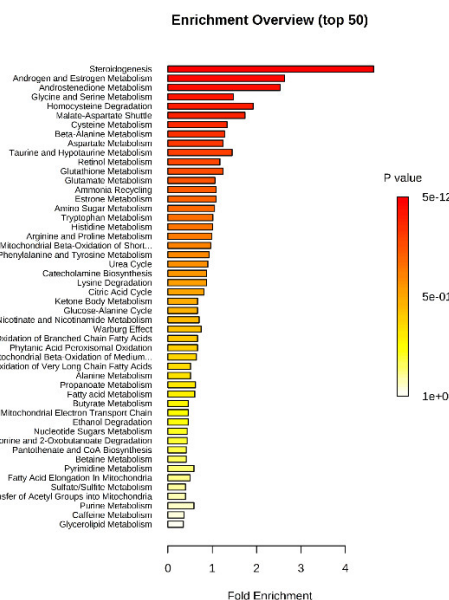

**Figure S4.** Summary plot for over-representation analysis (ORA) of blood plasma metabolites with an abnormal concentration in obese patients (stage 3 obesity in males and females). Other ORA related data is presented in Table S6.

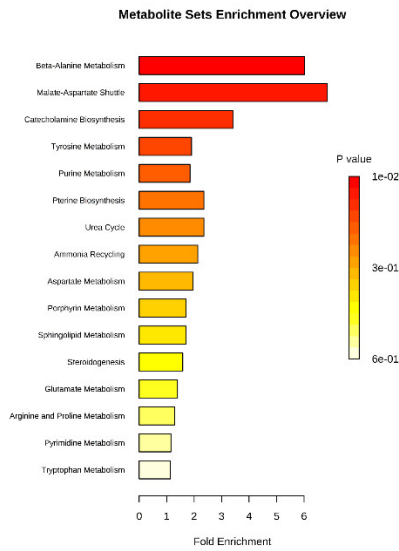

**Figure S5.** Summary plot for over-representation analysis (ORA) of blood plasma metabolites with an abnormal concentration in overweight males. Other ORA related data is presented in Table S7.

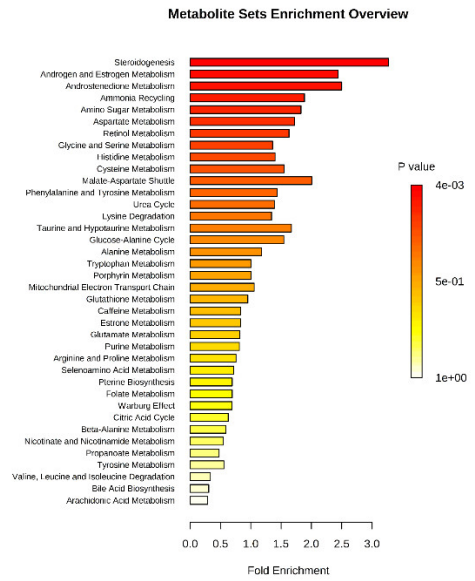

**Figure S7.** Summary plot for over-representation analysis (ORA) of blood plasma metabolites with an abnormal concentration in obese patients (stage 2 obesity in males). Other ORA related data is presented in Table S9.

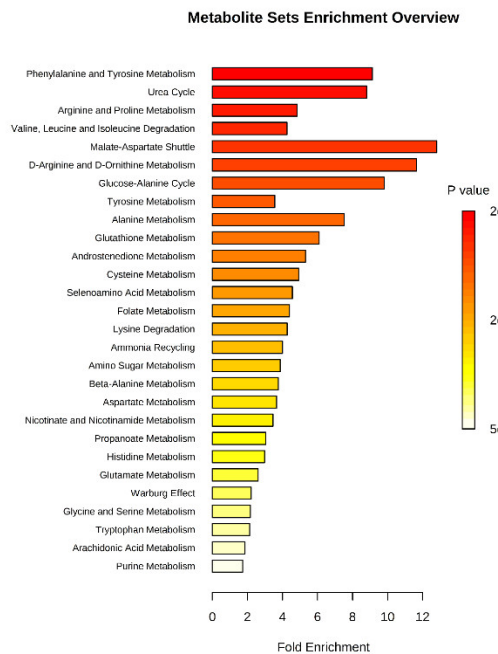

**Figure S6.** Summary plot for over-representation analysis (ORA) of blood plasma metabolites with an abnormal concentration in obese patients (stage 1 obesity in males). Other ORA related data is presented in Table S8.

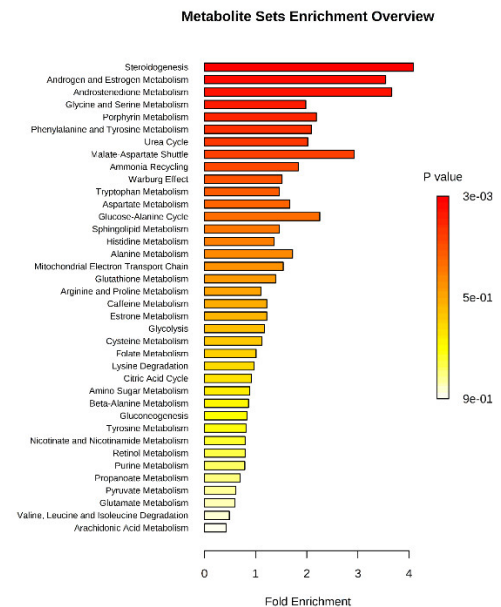

**Figure S8.** Summary plot for over-representation analysis (ORA) of blood plasma metabolites with an abnormal concentration in obese patients (stage 3 obesity in males). Other ORA related data is presented in Table S10.

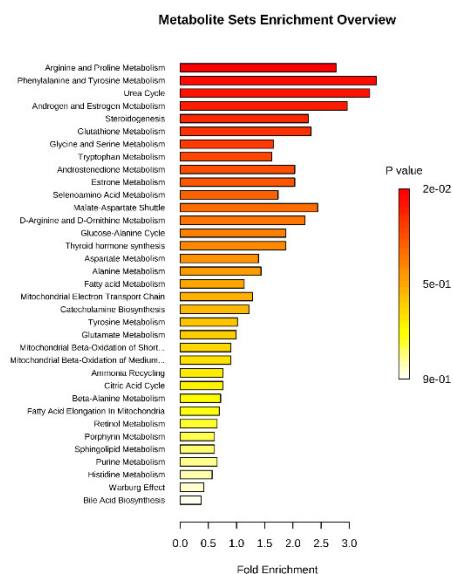

**Figure S9.** Summary plot for over-representation analysis (ORA) of blood plasma metabolites with an abnormal concentration in overweight females. Other ORA related data is presented in Table S11.

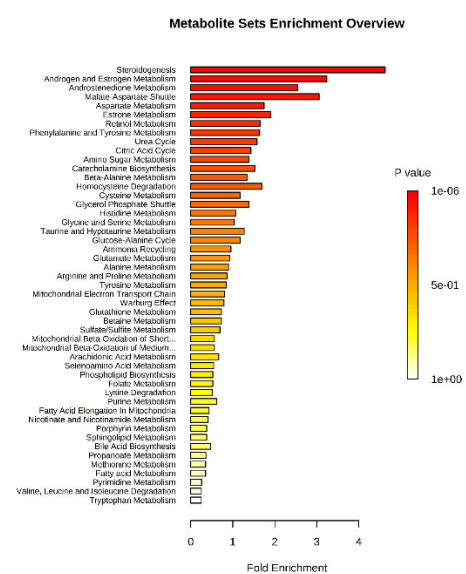

**Figure S11.** Summary plot for over-representation analysis (ORA) of blood plasma metabolites with an abnormal concentration in obese patients (stage 2 obesity in females). Other ORA related data is presented in Table S13.

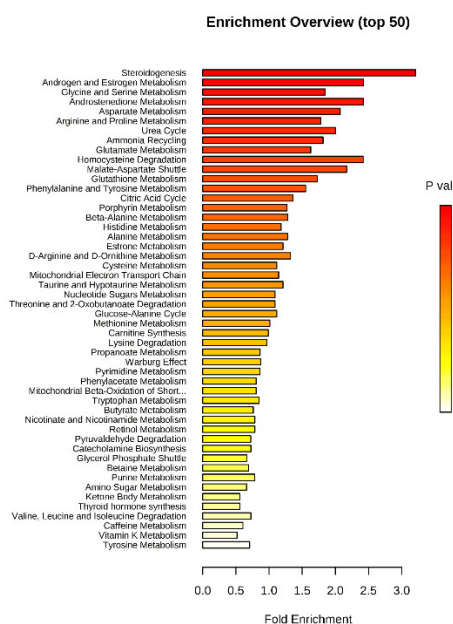

**Figure S10.** Summary plot for over-representation analysis (ORA) of blood plasma metabolites with an abnormal concentration in obese patients (stage 1 obesity in females). Other ORA related data is presented in Table S12.

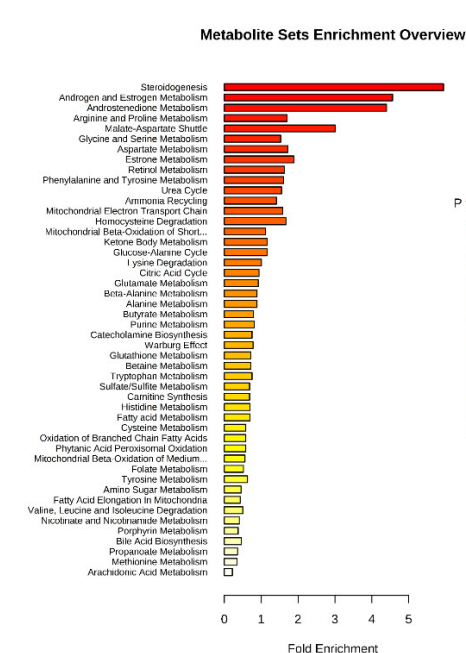

**Figure S12.** Summary plot for over-representation analysis (ORA) of blood plasma metabolites with an abnormal concentration in obese patients (stage 3 obesity in females). Other ORA related data is presented in Table S14.



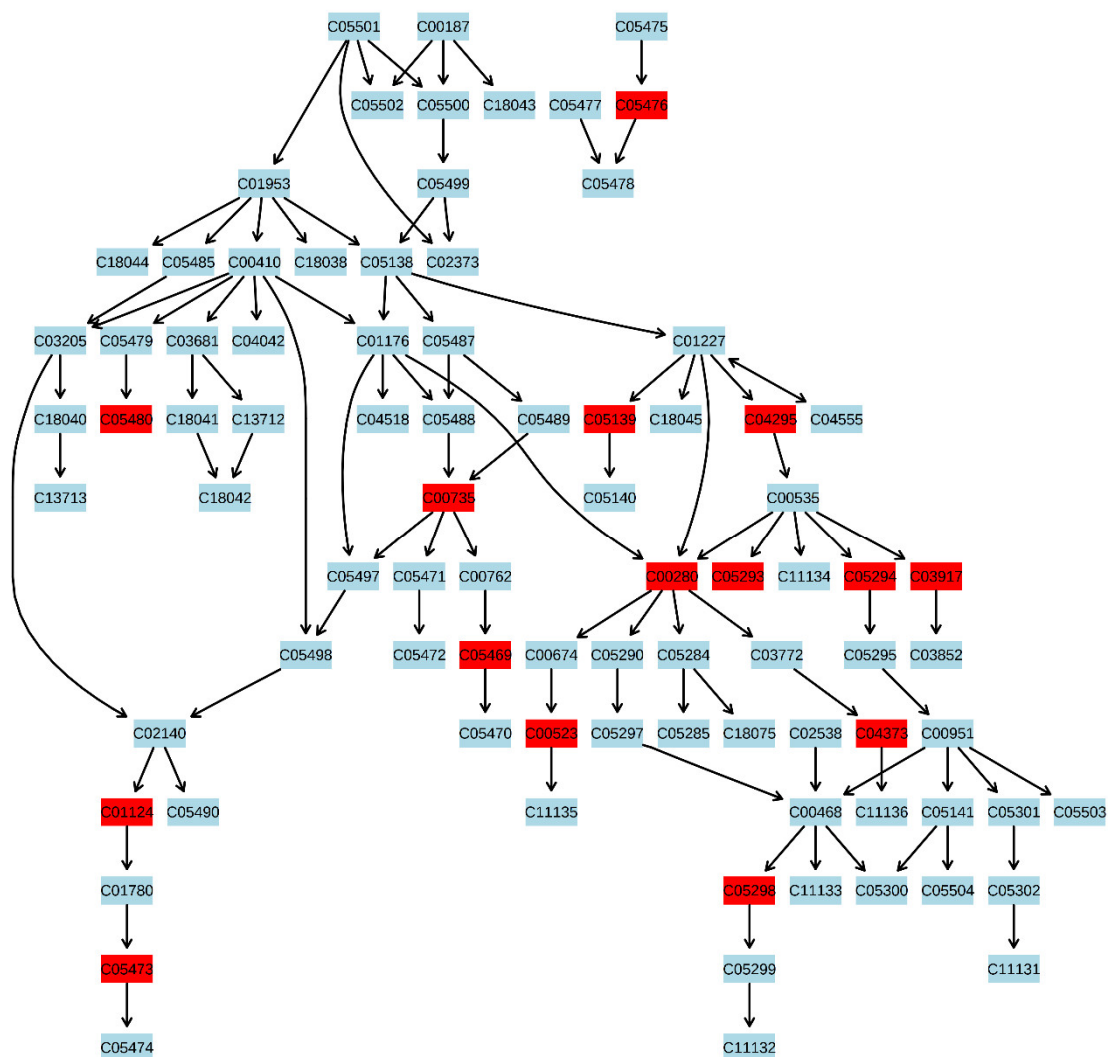

**Figure S13.** Projection of blood plasma metabolites with an abnormal concentration in males with stage 3 obesity on the steroid hormone biosynthesis pathway. Metabolites are labeled by KEGG identifiers. Altered metabolites are marked by red boxes. The image was generated using MetaboAnalyst software.

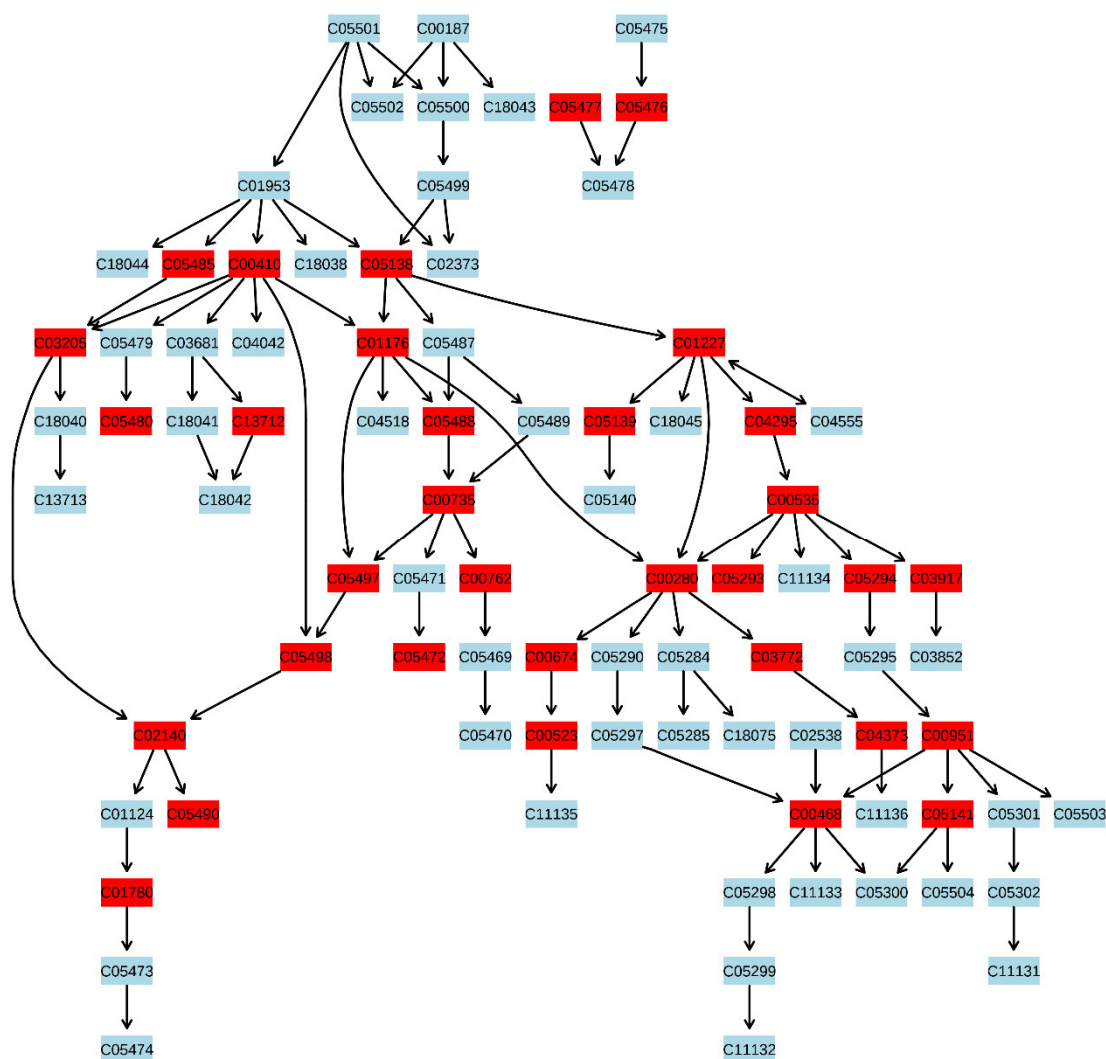

**Figure S14.** Projection of blood plasma metabolites with an abnormal concentration in females with stage 3 obesity on the steroid hormone biosynthesis pathway. Metabolites are labeled by KEGG identifiers. Altered metabolites are marked by red boxes. The image was generated using MetaboAnalyst software.

**Table S3.** Data related to the over-representation analysis (ORA) of blood plasma metabolites with an abnormal concentration in overweight males and females, presented in Figure S1.

|                                            | total | expected | hits | Raw p    | Holm p   | FDR      |
|--------------------------------------------|-------|----------|------|----------|----------|----------|
| Steroidogenesis                            | 43    | 3.57     | 14   | 2.80E-06 | 2.74E-04 | 2.74E-04 |
| Androstenedione Metabolism                 | 24    | 1.99     | 8    | 3.98E-04 | 3.86E-02 | 1.95E-02 |
| Androgen and Estrogen Metabolism           | 33    | 2.74     | 9    | 9.02E-04 | 8.66E-02 | 2.95E-02 |
| Aspartate Metabolism                       | 35    | 2.91     | 6    | 6.27E-02 | 1.00E+00 | 1.00E+00 |
| Urea Cycle                                 | 29    | 2.41     | 5    | 8.50E-02 | 1.00E+00 | 1.00E+00 |
| Ammonia Recycling                          | 32    | 2.66     | 5    | 1.19E-01 | 1.00E+00 | 1.00E+00 |
| Estrone Metabolism                         | 24    | 1.99     | 4    | 1.31E-01 | 1.00E+00 | 1.00E+00 |
| Beta-Alanine Metabolism                    | 34    | 2.82     | 5    | 1.44E-01 | 1.00E+00 | 1.00E+00 |
| Malate-Aspartate Shuttle                   | 10    | 0.83     | 2    | 1.99E-01 | 1.00E+00 | 1.00E+00 |
| Glucose-Alanine Cycle                      | 13    | 1.08     | 2    | 2.94E-01 | 1.00E+00 | 1.00E+00 |
| Glycine and Serine Metabolism              | 59    | 4.90     | 6    | 3.64E-01 | 1.00E+00 | 1.00E+00 |
| Cysteine Metabolism                        | 26    | 2.16     | 3    | 3.68E-01 | 1.00E+00 | 1.00E+00 |
| Retinol Metabolism                         | 37    | 3.07     | 4    | 3.69E-01 | 1.00E+00 | 1.00E+00 |
| Tryptophan Metabolism                      | 60    | 4.98     | 6    | 3.80E-01 | 1.00E+00 | 1.00E+00 |
| Glutamate Metabolism                       | 49    | 4.07     | 5    | 3.85E-01 | 1.00E+00 | 1.00E+00 |
| Phenylalanine and Tyrosine Metabolism      | 28    | 2.32     | 3    | 4.15E-01 | 1.00E+00 | 1.00E+00 |
| Alanine Metabolism                         | 17    | 1.41     | 2    | 4.19E-01 | 1.00E+00 | 1.00E+00 |
| Lysine Degradation                         | 30    | 2.49     | 3    | 4.61E-01 | 1.00E+00 | 1.00E+00 |
| Histidine Metabolism                       | 43    | 3.57     | 4    | 4.86E-01 | 1.00E+00 | 1.00E+00 |
| Citric Acid Cycle                          | 32    | 2.66     | 3    | 5.05E-01 | 1.00E+00 | 1.00E+00 |
| Warburg Effect                             | 58    | 4.81     | 5    | 5.37E-01 | 1.00E+00 | 1.00E+00 |
| Phenylacetate Metabolism                   | 9     | 0.75     | 1    | 5.43E-01 | 1.00E+00 | 1.00E+00 |
| Nicotinate and Nicotinamide Metabolism     | 37    | 3.07     | 3    | 6.07E-01 | 1.00E+00 | 1.00E+00 |
| D-Arginine and D-Ornithine Metabolism      | 11    | 0.91     | 1    | 6.16E-01 | 1.00E+00 | 1.00E+00 |
| Taurine and Hypotaurine Metabolism         | 12    | 1.00     | 1    | 6.49E-01 | 1.00E+00 | 1.00E+00 |
| Arginine and Proline Metabolism            | 53    | 4.40     | 4    | 6.57E-01 | 1.00E+00 | 1.00E+00 |
| Porphyrin Metabolism                       | 40    | 3.32     | 3    | 6.61E-01 | 1.00E+00 | 1.00E+00 |
| Folate Metabolism                          | 29    | 2.41     | 2    | 7.11E-01 | 1.00E+00 | 1.00E+00 |
| Pyrimidine Metabolism                      | 59    | 4.90     | 4    | 7.40E-01 | 1.00E+00 | 1.00E+00 |
| Amino Sugar Metabolism                     | 33    | 2.74     | 2    | 7.76E-01 | 1.00E+00 | 1.00E+00 |
| Gluconeogenesis                            | 35    | 2.91     | 2    | 8.04E-01 | 1.00E+00 | 1.00E+00 |
| Mitochondrial Electron Transport Chain     | 19    | 1.58     | 1    | 8.10E-01 | 1.00E+00 | 1.00E+00 |
| Nucleotide Sugars Metabolism               | 20    | 1.66     | 1    | 8.26E-01 | 1.00E+00 | 1.00E+00 |
| Catecholamine Biosynthesis                 | 20    | 1.66     | 1    | 8.26E-01 | 1.00E+00 | 1.00E+00 |
| Glutathione Metabolism                     | 21    | 1.74     | 1    | 8.41E-01 | 1.00E+00 | 1.00E+00 |
| Sulfate/Sulfite Metabolism                 | 22    | 1.83     | 1    | 8.54E-01 | 1.00E+00 | 1.00E+00 |
| Carnitine Synthesis                        | 22    | 1.83     | 1    | 8.54E-01 | 1.00E+00 | 1.00E+00 |
| Sphingolipid Metabolism                    | 40    | 3.32     | 2    | 8.61E-01 | 1.00E+00 | 1.00E+00 |
| Tyrosine Metabolism                        | 72    | 5.98     | 4    | 8.68E-01 | 1.00E+00 | 1.00E+00 |
| Propanoate Metabolism                      | 42    | 3.49     | 2    | 8.79E-01 | 1.00E+00 | 1.00E+00 |
| Purine Metabolism                          | 74    | 6.14     | 4    | 8.81E-01 | 1.00E+00 | 1.00E+00 |
| Glycolysis                                 | 25    | 2.08     | 1    | 8.88E-01 | 1.00E+00 | 1.00E+00 |
| Oxidation of Branched Chain Fatty Acids    | 26    | 2.16     | 1    | 8.98E-01 | 1.00E+00 | 1.00E+00 |
| Phytanic Acid Peroxisomal Oxidation        | 26    | 2.16     | 1    | 8.98E-01 | 1.00E+00 | 1.00E+00 |
| Pentose Phosphate Pathway                  | 29    | 2.41     | 1    | 9.22E-01 | 1.00E+00 | 1.00E+00 |
| Starch and Sucrose Metabolism              | 31    | 2.57     | 1    | 9.35E-01 | 1.00E+00 | 1.00E+00 |
| Arachidonic Acid Metabolism                | 69    | 5.73     | 3    | 9.39E-01 | 1.00E+00 | 1.00E+00 |
| Valine, Leucine and Isoleucine Degradation | 60    | 4.98     | 2    | 9.68E-01 | 1.00E+00 | 1.00E+00 |
| Bile Acid Biosynthesis                     | 65    | 5.40     | 1    | 9.97E-01 | 1.00E+00 | 1.00E+00 |

Tables S3-S14 were generated by MetaboAnalyst.

**Table S4.** Data related to the over-representation analysis (ORA) of blood plasma metabolites with an abnormal concentration in obese patients (stage 1 obesity in males and females), presented in Figure S2.

|                                                                   | total | expected | hits | Raw p    | Holm p   | FDR      |
|-------------------------------------------------------------------|-------|----------|------|----------|----------|----------|
| Steroidogenesis                                                   | 43    | 6.09     | 17   | 2.37E-05 | 2.32E-03 | 2.32E-03 |
| Glycine and Serine Metabolism                                     | 59    | 8.35     | 16   | 5.27E-03 | 5.11E-01 | 2.58E-01 |
| Androgen and Estrogen Metabolism                                  | 33    | 4.67     | 10   | 1.19E-02 | 1.00E+00 | 3.24E-01 |
| Androstenedione Metabolism                                        | 24    | 3.40     | 8    | 1.32E-02 | 1.00E+00 | 3.24E-01 |
| Arginine and Proline Metabolism                                   | 53    | 7.50     | 13   | 2.74E-02 | 1.00E+00 | 5.36E-01 |
| Glutamate Metabolism                                              | 49    | 6.94     | 12   | 3.40E-02 | 1.00E+00 | 5.55E-01 |
| Urea Cycle                                                        | 29    | 4.11     | 8    | 4.15E-02 | 1.00E+00 | 5.80E-01 |
| Aspartate Metabolism                                              | 35    | 4.96     | 9    | 4.77E-02 | 1.00E+00 | 5.84E-01 |
| Homocysteine Degradation                                          | 9     | 1.27     | 3    | 1.23E-01 | 1.00E+00 | 1.00E+00 |
| Ammonia Recycling                                                 | 32    | 4.53     | 7    | 1.54E-01 | 1.00E+00 | 1.00E+00 |
| Malate-Aspartate Shuttle                                          | 10    | 1.42     | 3    | 1.58E-01 | 1.00E+00 | 1.00E+00 |
| Glutathione Metabolism                                            | 21    | 2.97     | 5    | 1.64E-01 | 1.00E+00 | 1.00E+00 |
| Alanine Metabolism                                                | 17    | 2.41     | 4    | 2.11E-01 | 1.00E+00 | 1.00E+00 |
| Glucose-Alanine Cycle                                             | 13    | 1.84     | 3    | 2.76E-01 | 1.00E+00 | 1.00E+00 |
| Estrone Metabolism                                                | 24    | 3.40     | 4    | 4.49E-01 | 1.00E+00 | 1.00E+00 |
| Citric Acid Cycle                                                 | 32    | 4.53     | 5    | 4.83E-01 | 1.00E+00 | 1.00E+00 |
| Porphyrin Metabolism                                              | 40    | 5.66     | 6    | 5.09E-01 | 1.00E+00 | 1.00E+00 |
| Amino Sugar Metabolism                                            | 33    | 4.67     | 5    | 5.12E-01 | 1.00E+00 | 1.00E+00 |
| Cysteine Metabolism                                               | 26    | 3.68     | 4    | 5.15E-01 | 1.00E+00 | 1.00E+00 |
| Taurine and Hypotaurine Metabolism                                | 12    | 1.70     | 2    | 5.24E-01 | 1.00E+00 | 1.00E+00 |
| Catecholamine Biosynthesis                                        | 20    | 2.83     | 3    | 5.55E-01 | 1.00E+00 | 1.00E+00 |
| Selenoamino Acid Metabolism                                       | 28    | 3.96     | 4    | 5.77E-01 | 1.00E+00 | 1.00E+00 |
| Tyrosine Metabolism                                               | 72    | 10.20    | 10   | 5.83E-01 | 1.00E+00 | 1.00E+00 |
| Histidine Metabolism                                              | 43    | 6.09     | 6    | 5.85E-01 | 1.00E+00 | 1.00E+00 |
| Carnitine Synthesis                                               | 22    | 3.12     | 3    | 6.23E-01 | 1.00E+00 | 1.00E+00 |
| Beta-Alanine Metabolism                                           | 34    | 4.81     | 4    | 7.33E-01 | 1.00E+00 | 1.00E+00 |
| Phenylacetate Metabolism                                          | 9     | 1.27     | 1    | 7.48E-01 | 1.00E+00 | 1.00E+00 |
| Methionine Metabolism                                             | 43    | 6.09     | 5    | 7.53E-01 | 1.00E+00 | 1.00E+00 |
| Tryptophan Metabolism                                             | 60    | 8.50     | 7    | 7.72E-01 | 1.00E+00 | 1.00E+00 |
| Butyrate Metabolism                                               | 19    | 2.69     | 2    | 7.76E-01 | 1.00E+00 | 1.00E+00 |
| Mitochondrial Electron Transport Chain                            | 19    | 2.69     | 2    | 7.76E-01 | 1.00E+00 | 1.00E+00 |
| Phenylalanine and Tyrosine Metabolism                             | 28    | 3.96     | 3    | 7.83E-01 | 1.00E+00 | 1.00E+00 |
| Retinol Metabolism                                                | 37    | 5.24     | 4    | 7.94E-01 | 1.00E+00 | 1.00E+00 |
| Nucleotide Sugars Metabolism                                      | 20    | 2.83     | 2    | 8.00E-01 | 1.00E+00 | 1.00E+00 |
| Threonine and 2-Oxobutanoate Degradation                          | 20    | 2.83     | 2    | 8.00E-01 | 1.00E+00 | 1.00E+00 |
| D-Arginine and D-Ornithine Metabolism                             | 11    | 1.56     | 1    | 8.15E-01 | 1.00E+00 | 1.00E+00 |
| Lysine Degradation                                                | 30    | 4.25     | 3    | 8.22E-01 | 1.00E+00 | 1.00E+00 |
| Warburg Effect                                                    | 58    | 8.21     | 6    | 8.55E-01 | 1.00E+00 | 1.00E+00 |
| Ketone Body Metabolism                                            | 13    | 1.84     | 1    | 8.64E-01 | 1.00E+00 | 1.00E+00 |
| Propanoate Metabolism                                             | 42    | 5.95     | 4    | 8.69E-01 | 1.00E+00 | 1.00E+00 |
| Valine, Leucine and Isoleucine Degradation                        | 60    | 8.50     | 6    | 8.77E-01 | 1.00E+00 | 1.00E+00 |
| Oxidation of Branched Chain Fatty Acids                           | 26    | 3.68     | 2    | 9.03E-01 | 1.00E+00 | 1.00E+00 |
| Phytanic Acid Peroxisomal Oxidation                               | 26    | 3.68     | 2    | 9.03E-01 | 1.00E+00 | 1.00E+00 |
| Mitochondrial Beta-Oxidation of Short Chain Saturated Fatty Acids | 27    | 3.82     | 2    | 9.15E-01 | 1.00E+00 | 1.00E+00 |
| Nicotinate and Nicotinamide Metabolism                            | 37    | 5.24     | 3    | 9.15E-01 | 1.00E+00 | 1.00E+00 |
| Folate Metabolism                                                 | 29    | 4.11     | 2    | 9.34E-01 | 1.00E+00 | 1.00E+00 |
| Spermidine and Spermine Biosynthesis                              | 18    | 2.55     | 1    | 9.38E-01 | 1.00E+00 | 1.00E+00 |
| Pyrimidine Metabolism                                             | 59    | 8.35     | 5    | 9.39E-01 | 1.00E+00 | 1.00E+00 |
| Starch and Sucrose Metabolism                                     | 31    | 4.39     | 2    | 9.49E-01 | 1.00E+00 | 1.00E+00 |
| Riboflavin Metabolism                                             | 20    | 2.83     | 1    | 9.54E-01 | 1.00E+00 | 1.00E+00 |
| Lactose Synthesis                                                 | 20    | 2.83     | 1    | 9.54E-01 | 1.00E+00 | 1.00E+00 |
| Pantothenate and CoA Biosynthesis                                 | 21    | 2.97     | 1    | 9.61E-01 | 1.00E+00 | 1.00E+00 |
| Betaine Metabolism                                                | 21    | 2.97     | 1    | 9.61E-01 | 1.00E+00 | 1.00E+00 |
| Purine Metabolism                                                 | 74    | 10.50    | 6    | 9.65E-01 | 1.00E+00 | 1.00E+00 |
| Sulfate/Sulfite Metabolism                                        | 22    | 3.12     | 1    | 9.67E-01 | 1.00E+00 | 1.00E+00 |
| Transfer of Acetyl Groups into Mitochondria                       | 22    | 3.12     | 1    | 9.67E-01 | 1.00E+00 | 1.00E+00 |
| Glycerolipid Metabolism                                           | 25    | 3.54     | 1    | 9.79E-01 | 1.00E+00 | 1.00E+00 |
| Sphingolipid Metabolism                                           | 40    | 5.66     | 2    | 9.85E-01 | 1.00E+00 | 1.00E+00 |
| Pterine Biosynthesis                                              | 29    | 4.11     | 1    | 9.89E-01 | 1.00E+00 | 1.00E+00 |
| Pentose Phosphate Pathway                                         | 29    | 4.11     | 1    | 9.89E-01 | 1.00E+00 | 1.00E+00 |
| Bile Acid Biosynthesis                                            | 65    | 9.20     | 4    | 9.89E-01 | 1.00E+00 | 1.00E+00 |
| Pyruvate Metabolism                                               | 48    | 6.80     | 2    | 9.95E-01 | 1.00E+00 | 1.00E+00 |
| Fatty Acid Elongation In Mitochondria                             | 35    | 4.96     | 1    | 9.96E-01 | 1.00E+00 | 1.00E+00 |
| Gluconeogenesis                                                   | 35    | 4.96     | 1    | 9.96E-01 | 1.00E+00 | 1.00E+00 |
| Galactose Metabolism                                              | 38    | 5.38     | 1    | 9.97E-01 | 1.00E+00 | 1.00E+00 |
| Arachidonic Acid Metabolism                                       | 69    | 9.77     | 3    | 9.98E-01 | 1.00E+00 | 1.00E+00 |
| Fatty acid Metabolism                                             | 43    | 6.09     | 1    | 9.99E-01 | 1.00E+00 | 1.00E+00 |

**Table S5.** Data related to the over-representation analysis (ORA) of blood plasma metabolites with an abnormal concentration in obese patients (stage 2 obesity in males and females) , presented in Figure S3.

|                                            | total | expected | hits | Raw p    | Holm p   | FDR      |
|--------------------------------------------|-------|----------|------|----------|----------|----------|
| Steroidogenesis                            | 43    | 5.12     | 19   | 5.05E-08 | 4.95E-06 | 4.95E-06 |
| Androgen and Estrogen Metabolism           | 33    | 3.93     | 9    | 1.15E-02 | 1.00E+00 | 5.63E-01 |
| Androstenedione Metabolism                 | 24    | 2.86     | 7    | 1.75E-02 | 1.00E+00 | 5.71E-01 |
| Glycine and Serine Metabolism              | 59    | 7.03     | 12   | 3.87E-02 | 1.00E+00 | 9.20E-01 |
| Aspartate Metabolism                       | 35    | 4.17     | 8    | 4.70E-02 | 1.00E+00 | 9.20E-01 |
| Malate-Aspartate Shuttle                   | 10    | 1.19     | 3    | 1.06E-01 | 1.00E+00 | 1.00E+00 |
| Urea Cycle                                 | 29    | 3.46     | 6    | 1.20E-01 | 1.00E+00 | 1.00E+00 |
| Arginine and Proline Metabolism            | 53    | 6.31     | 9    | 1.69E-01 | 1.00E+00 | 1.00E+00 |
| Ammonia Recycling                          | 32    | 3.81     | 6    | 1.71E-01 | 1.00E+00 | 1.00E+00 |
| Glutamate Metabolism                       | 49    | 5.84     | 8    | 2.19E-01 | 1.00E+00 | 1.00E+00 |
| Homocysteine Degradation                   | 9     | 1.07     | 2    | 2.92E-01 | 1.00E+00 | 1.00E+00 |
| Alanine Metabolism                         | 17    | 2.03     | 3    | 3.30E-01 | 1.00E+00 | 1.00E+00 |
| Cysteine Metabolism                        | 26    | 3.10     | 4    | 3.76E-01 | 1.00E+00 | 1.00E+00 |
| Beta-Alanine Metabolism                    | 34    | 4.05     | 5    | 3.81E-01 | 1.00E+00 | 1.00E+00 |
| Histidine Metabolism                       | 43    | 5.12     | 6    | 4.07E-01 | 1.00E+00 | 1.00E+00 |
| Phenylalanine and Tyrosine Metabolism      | 28    | 3.34     | 4    | 4.33E-01 | 1.00E+00 | 1.00E+00 |
| Glucose-Alanine Cycle                      | 13    | 1.55     | 2    | 4.71E-01 | 1.00E+00 | 1.00E+00 |
| Carnitine Synthesis                        | 22    | 2.62     | 3    | 4.98E-01 | 1.00E+00 | 1.00E+00 |
| Citric Acid Cycle                          | 32    | 3.81     | 4    | 5.42E-01 | 1.00E+00 | 1.00E+00 |
| Estrone Metabolism                         | 24    | 2.86     | 3    | 5.60E-01 | 1.00E+00 | 1.00E+00 |
| Retinol Metabolism                         | 37    | 4.41     | 4    | 6.62E-01 | 1.00E+00 | 1.00E+00 |
| Mitochondrial Electron Transport Chain     | 19    | 2.26     | 2    | 6.82E-01 | 1.00E+00 | 1.00E+00 |
| Thiamine Metabolism                        | 9     | 1.07     | 1    | 6.82E-01 | 1.00E+00 | 1.00E+00 |
| Catecholamine Biosynthesis                 | 20    | 2.38     | 2    | 7.10E-01 | 1.00E+00 | 1.00E+00 |
| Lysine Degradation                         | 30    | 3.57     | 3    | 7.15E-01 | 1.00E+00 | 1.00E+00 |
| Glutathione Metabolism                     | 21    | 2.50     | 2    | 7.36E-01 | 1.00E+00 | 1.00E+00 |
| D-Arginine and D-Ornithine Metabolism      | 11    | 1.31     | 1    | 7.54E-01 | 1.00E+00 | 1.00E+00 |
| Amino Sugar Metabolism                     | 33    | 3.93     | 3    | 7.75E-01 | 1.00E+00 | 1.00E+00 |
| Taurine and Hypotaurine Metabolism         | 12    | 1.43     | 1    | 7.84E-01 | 1.00E+00 | 1.00E+00 |
| Ketone Body Metabolism                     | 13    | 1.55     | 1    | 8.10E-01 | 1.00E+00 | 1.00E+00 |
| Oxidation of Branched Chain Fatty Acids    | 26    | 3.10     | 2    | 8.37E-01 | 1.00E+00 | 1.00E+00 |
| Phytanic Acid Peroxisomal Oxidation        | 26    | 3.10     | 2    | 8.37E-01 | 1.00E+00 | 1.00E+00 |
| Nicotinate and Nicotinamide Metabolism     | 37    | 4.41     | 3    | 8.39E-01 | 1.00E+00 | 1.00E+00 |
| Warburg Effect                             | 58    | 6.91     | 5    | 8.44E-01 | 1.00E+00 | 1.00E+00 |
| Tryptophan Metabolism                      | 60    | 7.15     | 5    | 8.65E-01 | 1.00E+00 | 1.00E+00 |
| Selenoamino Acid Metabolism                | 28    | 3.34     | 2    | 8.66E-01 | 1.00E+00 | 1.00E+00 |
| Porphyrin Metabolism                       | 40    | 4.77     | 3    | 8.76E-01 | 1.00E+00 | 1.00E+00 |
| Folate Metabolism                          | 29    | 3.46     | 2    | 8.79E-01 | 1.00E+00 | 1.00E+00 |
| Propanoate Metabolism                      | 42    | 5.00     | 3    | 8.96E-01 | 1.00E+00 | 1.00E+00 |
| Purine Metabolism                          | 74    | 8.82     | 6    | 8.97E-01 | 1.00E+00 | 1.00E+00 |
| Methionine Metabolism                      | 43    | 5.12     | 3    | 9.05E-01 | 1.00E+00 | 1.00E+00 |
| Butyrate Metabolism                        | 19    | 2.26     | 1    | 9.12E-01 | 1.00E+00 | 1.00E+00 |
| Threonine and 2-Oxobutanoate Degradation   | 20    | 2.38     | 1    | 9.23E-01 | 1.00E+00 | 1.00E+00 |
| Betaine Metabolism                         | 21    | 2.50     | 1    | 9.32E-01 | 1.00E+00 | 1.00E+00 |
| Gluconeogenesis                            | 35    | 4.17     | 2    | 9.36E-01 | 1.00E+00 | 1.00E+00 |
| Sulfate/Sulfite Metabolism                 | 22    | 2.62     | 1    | 9.41E-01 | 1.00E+00 | 1.00E+00 |
| Valine, Leucine and Isoleucine Degradation | 60    | 7.15     | 4    | 9.43E-01 | 1.00E+00 | 1.00E+00 |
| Tyrosine Metabolism                        | 72    | 8.58     | 5    | 9.47E-01 | 1.00E+00 | 1.00E+00 |
| Glycerolipid Metabolism                    | 25    | 2.98     | 1    | 9.60E-01 | 1.00E+00 | 1.00E+00 |
| Glycolysis                                 | 25    | 2.98     | 1    | 9.60E-01 | 1.00E+00 | 1.00E+00 |
| Sphingolipid Metabolism                    | 40    | 4.77     | 2    | 9.63E-01 | 1.00E+00 | 1.00E+00 |
| Pterine Biosynthesis                       | 29    | 3.46     | 1    | 9.76E-01 | 1.00E+00 | 1.00E+00 |
| Pyrimidine Metabolism                      | 59    | 7.03     | 3    | 9.80E-01 | 1.00E+00 | 1.00E+00 |
| Bile Acid Biosynthesis                     | 65    | 7.74     | 3    | 9.89E-01 | 1.00E+00 | 1.00E+00 |
| Arachidonic Acid Metabolism                | 69    | 8.22     | 3    | 9.93E-01 | 1.00E+00 | 1.00E+00 |

**Table S6.** Data related to the over-representation analysis (ORA) of blood plasma metabolites with an abnormal concentration in obese patients (stage 3 obesity in males and females) , presented in Figure S4.

|                                                                    | total | expected | hits | Raw p    | Holm p   | FDR      |
|--------------------------------------------------------------------|-------|----------|------|----------|----------|----------|
| Steroidogenesis                                                    | 43    | 4.96     | 23   | 4.74E-12 | 4.64E-10 | 4.64E-10 |
| Androgen and Estrogen Metabolism                                   | 33    | 3.80     | 10   | 2.60E-03 | 2.52E-01 | 1.28E-01 |
| Androstenedione Metabolism                                         | 24    | 2.77     | 7    | 1.46E-02 | 1.00E+00 | 4.78E-01 |
| Glycine and Serine Metabolism                                      | 59    | 6.80     | 10   | 1.30E-01 | 1.00E+00 | 1.00E+00 |
| Homocysteine Degradation                                           | 9     | 1.04     | 2    | 2.78E-01 | 1.00E+00 | 1.00E+00 |
| Malate-Aspartate Shuttle                                           | 10    | 1.15     | 2    | 3.23E-01 | 1.00E+00 | 1.00E+00 |
| Cysteine Metabolism                                                | 26    | 3.00     | 4    | 3.51E-01 | 1.00E+00 | 1.00E+00 |
| Beta-Alanine Metabolism                                            | 34    | 3.92     | 5    | 3.53E-01 | 1.00E+00 | 1.00E+00 |
| Aspartate Metabolism                                               | 35    | 4.03     | 5    | 3.78E-01 | 1.00E+00 | 1.00E+00 |
| Taurine and Hypotaurine Metabolism                                 | 12    | 1.38     | 2    | 4.11E-01 | 1.00E+00 | 1.00E+00 |
| Retinol Metabolism                                                 | 37    | 4.26     | 5    | 4.26E-01 | 1.00E+00 | 1.00E+00 |
| Glutathione Metabolism                                             | 21    | 2.42     | 3    | 4.43E-01 | 1.00E+00 | 1.00E+00 |
| Glutamate Metabolism                                               | 49    | 5.65     | 6    | 5.05E-01 | 1.00E+00 | 1.00E+00 |
| Ammonia Recycling                                                  | 32    | 3.69     | 4    | 5.14E-01 | 1.00E+00 | 1.00E+00 |
| Estrone Metabolism                                                 | 24    | 2.77     | 3    | 5.36E-01 | 1.00E+00 | 1.00E+00 |
| Amino Sugar Metabolism                                             | 33    | 3.80     | 4    | 5.40E-01 | 1.00E+00 | 1.00E+00 |
| Tryptophan Metabolism                                              | 60    | 6.91     | 7    | 5.50E-01 | 1.00E+00 | 1.00E+00 |
| Histidine Metabolism                                               | 43    | 4.96     | 5    | 5.65E-01 | 1.00E+00 | 1.00E+00 |
| Arginine and Proline Metabolism                                    | 53    | 6.11     | 6    | 5.87E-01 | 1.00E+00 | 1.00E+00 |
| Mitochondrial Beta-Oxidation of Short Chain Saturated Fatty Acids  | 27    | 3.11     | 3    | 6.19E-01 | 1.00E+00 | 1.00E+00 |
| Phenylalanine and Tyrosine Metabolism                              | 28    | 3.23     | 3    | 6.45E-01 | 1.00E+00 | 1.00E+00 |
| Urea Cycle                                                         | 29    | 3.34     | 3    | 6.69E-01 | 1.00E+00 | 1.00E+00 |
| Catecholamine Biosynthesis                                         | 20    | 2.30     | 2    | 6.91E-01 | 1.00E+00 | 1.00E+00 |
| Lysine Degradation                                                 | 30    | 3.46     | 3    | 6.92E-01 | 1.00E+00 | 1.00E+00 |
| Citric Acid Cycle                                                  | 32    | 3.69     | 3    | 7.34E-01 | 1.00E+00 | 1.00E+00 |
| Ketone Body Metabolism                                             | 13    | 1.50     | 1    | 7.98E-01 | 1.00E+00 | 1.00E+00 |
| Glucose-Alanine Cycle                                              | 13    | 1.50     | 1    | 7.98E-01 | 1.00E+00 | 1.00E+00 |
| Nicotinate and Nicotinamide Metabolism                             | 37    | 4.26     | 3    | 8.21E-01 | 1.00E+00 | 1.00E+00 |
| Warburg Effect                                                     | 58    | 6.68     | 5    | 8.21E-01 | 1.00E+00 | 1.00E+00 |
| Oxidation of Branched Chain Fatty Acids                            | 26    | 3.00     | 2    | 8.22E-01 | 1.00E+00 | 1.00E+00 |
| Phytanic Acid Peroxisomal Oxidation                                | 26    | 3.00     | 2    | 8.22E-01 | 1.00E+00 | 1.00E+00 |
| Mitochondrial Beta-Oxidation of Medium Chain Saturated Fatty Acids | 27    | 3.11     | 2    | 8.38E-01 | 1.00E+00 | 1.00E+00 |
| Beta Oxidation of Very Long Chain Fatty Acids                      | 17    | 1.96     | 1    | 8.77E-01 | 1.00E+00 | 1.00E+00 |
| Alanine Metabolism                                                 | 17    | 1.96     | 1    | 8.77E-01 | 1.00E+00 | 1.00E+00 |
| Propanoate Metabolism                                              | 42    | 4.84     | 3    | 8.82E-01 | 1.00E+00 | 1.00E+00 |
| Fatty acid Metabolism                                              | 43    | 4.96     | 3    | 8.92E-01 | 1.00E+00 | 1.00E+00 |
| Butyrate Metabolism                                                | 19    | 2.19     | 1    | 9.04E-01 | 1.00E+00 | 1.00E+00 |
| Mitochondrial Electron Transport Chain                             | 19    | 2.19     | 1    | 9.04E-01 | 1.00E+00 | 1.00E+00 |
| Ethanol Degradation                                                | 19    | 2.19     | 1    | 9.04E-01 | 1.00E+00 | 1.00E+00 |
| Nucleotide Sugars Metabolism                                       | 20    | 2.30     | 1    | 9.16E-01 | 1.00E+00 | 1.00E+00 |
| Threonine and 2-Oxobutanoate Degradation                           | 20    | 2.30     | 1    | 9.16E-01 | 1.00E+00 | 1.00E+00 |
| Pantothenate and CoA Biosynthesis                                  | 21    | 2.42     | 1    | 9.26E-01 | 1.00E+00 | 1.00E+00 |
| Betaine Metabolism                                                 | 21    | 2.42     | 1    | 9.26E-01 | 1.00E+00 | 1.00E+00 |
| Pyrimidine Metabolism                                              | 59    | 6.80     | 4    | 9.26E-01 | 1.00E+00 | 1.00E+00 |
| Fatty Acid Elongation In Mitochondria                              | 35    | 4.03     | 2    | 9.27E-01 | 1.00E+00 | 1.00E+00 |
| Sulfate/Sulfite Metabolism                                         | 22    | 2.54     | 1    | 9.34E-01 | 1.00E+00 | 1.00E+00 |
| Transfer of Acetyl Groups into Mitochondria                        | 22    | 2.54     | 1    | 9.34E-01 | 1.00E+00 | 1.00E+00 |
| Purine Metabolism                                                  | 74    | 8.53     | 5    | 9.45E-01 | 1.00E+00 | 1.00E+00 |
| Caffeine Metabolism                                                | 24    | 2.77     | 1    | 9.49E-01 | 1.00E+00 | 1.00E+00 |
| Glycerolipid Metabolism                                            | 25    | 2.88     | 1    | 9.55E-01 | 1.00E+00 | 1.00E+00 |
| Glycolysis                                                         | 25    | 2.88     | 1    | 9.55E-01 | 1.00E+00 | 1.00E+00 |
| Porphyrin Metabolism                                               | 40    | 4.61     | 2    | 9.57E-01 | 1.00E+00 | 1.00E+00 |
| Sphingolipid Metabolism                                            | 40    | 4.61     | 2    | 9.57E-01 | 1.00E+00 | 1.00E+00 |
| Methionine Metabolism                                              | 43    | 4.96     | 2    | 9.68E-01 | 1.00E+00 | 1.00E+00 |
| Mitochondrial Beta-Oxidation of Long Chain Saturated Fatty Acids   | 28    | 3.23     | 1    | 9.69E-01 | 1.00E+00 | 1.00E+00 |
| Pentose Phosphate Pathway                                          | 29    | 3.34     | 1    | 9.73E-01 | 1.00E+00 | 1.00E+00 |
| Folate Metabolism                                                  | 29    | 3.34     | 1    | 9.73E-01 | 1.00E+00 | 1.00E+00 |
| Tyrosine Metabolism                                                | 72    | 8.30     | 4    | 9.76E-01 | 1.00E+00 | 1.00E+00 |
| Valine, Leucine and Isoleucine Degradation                         | 60    | 6.91     | 3    | 9.78E-01 | 1.00E+00 | 1.00E+00 |
| Bile Acid Biosynthesis                                             | 65    | 7.49     | 3    | 9.87E-01 | 1.00E+00 | 1.00E+00 |
| Gluconeogenesis                                                    | 35    | 4.03     | 1    | 9.87E-01 | 1.00E+00 | 1.00E+00 |
| Fatty Acid Biosynthesis                                            | 35    | 4.03     | 1    | 9.87E-01 | 1.00E+00 | 1.00E+00 |
| Arachidonic Acid Metabolism                                        | 69    | 7.95     | 3    | 9.91E-01 | 1.00E+00 | 1.00E+00 |
| Steroid Biosynthesis                                               | 48    | 5.53     | 1    | 9.98E-01 | 1.00E+00 | 1.00E+00 |
| Pyruvate Metabolism                                                | 48    | 5.53     | 1    | 9.98E-01 | 1.00E+00 | 1.00E+00 |

**Table S7.** Data related to the over-representation analysis (ORA) of blood plasma metabolites with an abnormal concentration in overweight males, presented in Figure S5.

|                                 | total | expected | hits | Raw p    | Holm p   | FDR      |
|---------------------------------|-------|----------|------|----------|----------|----------|
| Beta-Alanine Metabolism         | 34    | 0.50     | 3    | 1.16E-02 | 1.00E+00 | 1.00E+00 |
| Malate-Aspartate Shuttle        | 10    | 0.15     | 1    | 1.38E-01 | 1.00E+00 | 1.00E+00 |
| Catecholamine Biosynthesis      | 20    | 0.29     | 1    | 2.58E-01 | 1.00E+00 | 1.00E+00 |
| Tyrosine Metabolism             | 72    | 1.05     | 2    | 2.85E-01 | 1.00E+00 | 1.00E+00 |
| Purine Metabolism               | 74    | 1.08     | 2    | 2.96E-01 | 1.00E+00 | 1.00E+00 |
| Pterine Biosynthesis            | 29    | 0.42     | 1    | 3.52E-01 | 1.00E+00 | 1.00E+00 |
| Urea Cycle                      | 29    | 0.42     | 1    | 3.52E-01 | 1.00E+00 | 1.00E+00 |
| Ammonia Recycling               | 32    | 0.47     | 1    | 3.81E-01 | 1.00E+00 | 1.00E+00 |
| Aspartate Metabolism            | 35    | 0.51     | 1    | 4.09E-01 | 1.00E+00 | 1.00E+00 |
| Porphyrin Metabolism            | 40    | 0.59     | 1    | 4.52E-01 | 1.00E+00 | 1.00E+00 |
| Sphingolipid Metabolism         | 40    | 0.59     | 1    | 4.52E-01 | 1.00E+00 | 1.00E+00 |
| Steroidogenesis                 | 43    | 0.63     | 1    | 4.77E-01 | 1.00E+00 | 1.00E+00 |
| Glutamate Metabolism            | 49    | 0.72     | 1    | 5.23E-01 | 1.00E+00 | 1.00E+00 |
| Arginine and Proline Metabolism | 53    | 0.78     | 1    | 5.52E-01 | 1.00E+00 | 1.00E+00 |
| Pyrimidine Metabolism           | 59    | 0.86     | 1    | 5.92E-01 | 1.00E+00 | 1.00E+00 |
| Tryptophan Metabolism           | 60    | 0.88     | 1    | 5.98E-01 | 1.00E+00 | 1.00E+00 |

**Table S8.** Data related to the over-representation analysis (ORA) of blood plasma metabolites with an abnormal concentration in obese patients (stage 1 obesity in males), presented in Figure S6.

|                                            | total | expected | hits | Raw p    | Holm p   | FDR      |
|--------------------------------------------|-------|----------|------|----------|----------|----------|
| Phenylalanine and Tyrosine Metabolism      | 28    | 0.22     | 2    | 1.82E-02 | 1.00E+00 | 9.56E-01 |
| Urea Cycle                                 | 29    | 0.23     | 2    | 1.95E-02 | 1.00E+00 | 9.56E-01 |
| Arginine and Proline Metabolism            | 53    | 0.41     | 2    | 6.02E-02 | 1.00E+00 | 1.00E+00 |
| Valine, Leucine and Isoleucine Degradation | 60    | 0.47     | 2    | 7.53E-02 | 1.00E+00 | 1.00E+00 |
| Malate-Aspartate Shuttle                   | 10    | 0.08     | 1    | 7.58E-02 | 1.00E+00 | 1.00E+00 |
| D-Arginine and D-Ornithine Metabolism      | 11    | 0.09     | 1    | 8.30E-02 | 1.00E+00 | 1.00E+00 |
| Glucose-Alanine Cycle                      | 13    | 0.10     | 1    | 9.75E-02 | 1.00E+00 | 1.00E+00 |
| Tyrosine Metabolism                        | 72    | 0.56     | 2    | 1.04E-01 | 1.00E+00 | 1.00E+00 |
| Alanine Metabolism                         | 17    | 0.13     | 1    | 1.26E-01 | 1.00E+00 | 1.00E+00 |
| Glutathione Metabolism                     | 21    | 0.16     | 1    | 1.53E-01 | 1.00E+00 | 1.00E+00 |
| Androstenedione Metabolism                 | 24    | 0.19     | 1    | 1.73E-01 | 1.00E+00 | 1.00E+00 |
| Cysteine Metabolism                        | 26    | 0.20     | 1    | 1.87E-01 | 1.00E+00 | 1.00E+00 |
| Selenoamino Acid Metabolism                | 28    | 0.22     | 1    | 2.00E-01 | 1.00E+00 | 1.00E+00 |
| Folate Metabolism                          | 29    | 0.23     | 1    | 2.06E-01 | 1.00E+00 | 1.00E+00 |
| Lysine Degradation                         | 30    | 0.23     | 1    | 2.12E-01 | 1.00E+00 | 1.00E+00 |
| Ammonia Recycling                          | 32    | 0.25     | 1    | 2.25E-01 | 1.00E+00 | 1.00E+00 |
| Amino Sugar Metabolism                     | 33    | 0.26     | 1    | 2.31E-01 | 1.00E+00 | 1.00E+00 |
| Beta-Alanine Metabolism                    | 34    | 0.27     | 1    | 2.37E-01 | 1.00E+00 | 1.00E+00 |
| Aspartate Metabolism                       | 35    | 0.27     | 1    | 2.44E-01 | 1.00E+00 | 1.00E+00 |
| Nicotinate and Nicotinamide Metabolism     | 37    | 0.29     | 1    | 2.56E-01 | 1.00E+00 | 1.00E+00 |
| Propanoate Metabolism                      | 42    | 0.33     | 1    | 2.86E-01 | 1.00E+00 | 1.00E+00 |
| Histidine Metabolism                       | 43    | 0.34     | 1    | 2.91E-01 | 1.00E+00 | 1.00E+00 |
| Glutamate Metabolism                       | 49    | 0.38     | 1    | 3.25E-01 | 1.00E+00 | 1.00E+00 |
| Warburg Effect                             | 58    | 0.45     | 1    | 3.74E-01 | 1.00E+00 | 1.00E+00 |
| Glycine and Serine Metabolism              | 59    | 0.46     | 1    | 3.79E-01 | 1.00E+00 | 1.00E+00 |
| Tryptophan Metabolism                      | 60    | 0.47     | 1    | 3.84E-01 | 1.00E+00 | 1.00E+00 |
| Arachidonic Acid Metabolism                | 69    | 0.54     | 1    | 4.29E-01 | 1.00E+00 | 1.00E+00 |
| Purine Metabolism                          | 74    | 0.58     | 1    | 4.52E-01 | 1.00E+00 | 1.00E+00 |

**Table S9.** Data related to the over-representation analysis (ORA) of blood plasma metabolites with an abnormal concentration in obese patients (stage 2 obesity in males), presented in Figure S7.

|                                            | total | expected | hits | Raw p    | Holm p   | FDR      |
|--------------------------------------------|-------|----------|------|----------|----------|----------|
| Steroidogenesis                            | 43    | 2.14     | 7    | 4.03E-03 | 3.95E-01 | 3.95E-01 |
| Androgen and Estrogen Metabolism           | 33    | 1.64     | 4    | 7.67E-02 | 1.00E+00 | 1.00E+00 |
| Androstenedione Metabolism                 | 24    | 1.20     | 3    | 1.13E-01 | 1.00E+00 | 1.00E+00 |
| Ammonia Recycling                          | 32    | 1.59     | 3    | 2.10E-01 | 1.00E+00 | 1.00E+00 |
| Amino Sugar Metabolism                     | 33    | 1.64     | 3    | 2.24E-01 | 1.00E+00 | 1.00E+00 |
| Aspartate Metabolism                       | 35    | 1.74     | 3    | 2.51E-01 | 1.00E+00 | 1.00E+00 |
| Retinol Metabolism                         | 37    | 1.84     | 3    | 2.79E-01 | 1.00E+00 | 1.00E+00 |
| Glycine and Serine Metabolism              | 59    | 2.94     | 4    | 3.38E-01 | 1.00E+00 | 1.00E+00 |
| Histidine Metabolism                       | 43    | 2.14     | 3    | 3.63E-01 | 1.00E+00 | 1.00E+00 |
| Cysteine Metabolism                        | 26    | 1.29     | 2    | 3.75E-01 | 1.00E+00 | 1.00E+00 |
| Malate-Aspartate Shuttle                   | 10    | 0.50     | 1    | 4.01E-01 | 1.00E+00 | 1.00E+00 |
| Phenylalanine and Tyrosine Metabolism      | 28    | 1.39     | 2    | 4.11E-01 | 1.00E+00 | 1.00E+00 |
| Urea Cycle                                 | 29    | 1.44     | 2    | 4.29E-01 | 1.00E+00 | 1.00E+00 |
| Lysine Degradation                         | 30    | 1.49     | 2    | 4.47E-01 | 1.00E+00 | 1.00E+00 |
| Taurine and Hypotaurine Metabolism         | 12    | 0.60     | 1    | 4.60E-01 | 1.00E+00 | 1.00E+00 |
| Glucose-Alanine Cycle                      | 13    | 0.65     | 1    | 4.87E-01 | 1.00E+00 | 1.00E+00 |
| Alanine Metabolism                         | 17    | 0.85     | 1    | 5.83E-01 | 1.00E+00 | 1.00E+00 |
| Tryptophan Metabolism                      | 60    | 2.99     | 3    | 5.86E-01 | 1.00E+00 | 1.00E+00 |
| Porphyrin Metabolism                       | 40    | 1.99     | 2    | 6.04E-01 | 1.00E+00 | 1.00E+00 |
| Mitochondrial Electron Transport Chain     | 19    | 0.95     | 1    | 6.25E-01 | 1.00E+00 | 1.00E+00 |
| Glutathione Metabolism                     | 21    | 1.05     | 1    | 6.62E-01 | 1.00E+00 | 1.00E+00 |
| Caffeine Metabolism                        | 24    | 1.20     | 1    | 7.11E-01 | 1.00E+00 | 1.00E+00 |
| Estrone Metabolism                         | 24    | 1.20     | 1    | 7.11E-01 | 1.00E+00 | 1.00E+00 |
| Glutamate Metabolism                       | 49    | 2.44     | 2    | 7.15E-01 | 1.00E+00 | 1.00E+00 |
| Purine Metabolism                          | 74    | 3.69     | 3    | 7.30E-01 | 1.00E+00 | 1.00E+00 |
| Arginine and Proline Metabolism            | 53    | 2.64     | 2    | 7.56E-01 | 1.00E+00 | 1.00E+00 |
| Selenoamino Acid Metabolism                | 28    | 1.39     | 1    | 7.65E-01 | 1.00E+00 | 1.00E+00 |
| Pterine Biosynthesis                       | 29    | 1.44     | 1    | 7.77E-01 | 1.00E+00 | 1.00E+00 |
| Folate Metabolism                          | 29    | 1.44     | 1    | 7.77E-01 | 1.00E+00 | 1.00E+00 |
| Warburg Effect                             | 58    | 2.89     | 2    | 8.00E-01 | 1.00E+00 | 1.00E+00 |
| Citric Acid Cycle                          | 32    | 1.59     | 1    | 8.10E-01 | 1.00E+00 | 1.00E+00 |
| Beta-Alanine Metabolism                    | 34    | 1.69     | 1    | 8.29E-01 | 1.00E+00 | 1.00E+00 |
| Nicotinate and Nicotinamide Metabolism     | 37    | 1.84     | 1    | 8.54E-01 | 1.00E+00 | 1.00E+00 |
| Propanoate Metabolism                      | 42    | 2.09     | 1    | 8.88E-01 | 1.00E+00 | 1.00E+00 |
| Tyrosine Metabolism                        | 72    | 3.59     | 2    | 8.88E-01 | 1.00E+00 | 1.00E+00 |
| Valine, Leucine and Isoleucine Degradation | 60    | 2.99     | 1    | 9.58E-01 | 1.00E+00 | 1.00E+00 |
| Bile Acid Biosynthesis                     | 65    | 3.24     | 1    | 9.68E-01 | 1.00E+00 | 1.00E+00 |
| Arachidonic Acid Metabolism                | 69    | 3.44     | 1    | 9.74E-01 | 1.00E+00 | 1.00E+00 |



**Table S10.** Data related to the over-representation analysis (ORA) of blood plasma metabolites with an abnormal concentration in obese patients (stage 3 obesity in males), presented in Figure S8.

|                                            | total | expected | hits | Raw p    | Holm p   | FDR      |
|--------------------------------------------|-------|----------|------|----------|----------|----------|
| Steroidogenesis                            | 43    | 1.47     | 6    | 2.50E-03 | 2.45E-01 | 2.45E-01 |
| Androgen and Estrogen Metabolism           | 33    | 1.13     | 4    | 2.31E-02 | 1.00E+00 | 1.00E+00 |
| Androstenedione Metabolism                 | 24    | 0.82     | 3    | 4.53E-02 | 1.00E+00 | 1.00E+00 |
| Glycine and Serine Metabolism              | 59    | 2.02     | 4    | 1.37E-01 | 1.00E+00 | 1.00E+00 |
| Porphyrin Metabolism                       | 40    | 1.37     | 3    | 1.53E-01 | 1.00E+00 | 1.00E+00 |
| Phenylalanine and Tyrosine Metabolism      | 28    | 0.96     | 2    | 2.48E-01 | 1.00E+00 | 1.00E+00 |
| Urea Cycle                                 | 29    | 0.99     | 2    | 2.61E-01 | 1.00E+00 | 1.00E+00 |
| Malate-Aspartate Shuttle                   | 10    | 0.34     | 1    | 2.95E-01 | 1.00E+00 | 1.00E+00 |
| Ammonia Recycling                          | 32    | 1.09     | 2    | 3.00E-01 | 1.00E+00 | 1.00E+00 |
| Warburg Effect                             | 58    | 1.98     | 3    | 3.18E-01 | 1.00E+00 | 1.00E+00 |
| Tryptophan Metabolism                      | 60    | 2.05     | 3    | 3.37E-01 | 1.00E+00 | 1.00E+00 |
| Aspartate Metabolism                       | 35    | 1.20     | 2    | 3.38E-01 | 1.00E+00 | 1.00E+00 |
| Glucose-Alanine Cycle                      | 13    | 0.44     | 1    | 3.65E-01 | 1.00E+00 | 1.00E+00 |
| Sphingolipid Metabolism                    | 40    | 1.37     | 2    | 4.01E-01 | 1.00E+00 | 1.00E+00 |
| Histidine Metabolism                       | 43    | 1.47     | 2    | 4.38E-01 | 1.00E+00 | 1.00E+00 |
| Alanine Metabolism                         | 17    | 0.58     | 1    | 4.49E-01 | 1.00E+00 | 1.00E+00 |
| Mitochondrial Electron Transport Chain     | 19    | 0.65     | 1    | 4.87E-01 | 1.00E+00 | 1.00E+00 |
| Glutathione Metabolism                     | 21    | 0.72     | 1    | 5.22E-01 | 1.00E+00 | 1.00E+00 |
| Arginine and Proline Metabolism            | 53    | 1.81     | 2    | 5.51E-01 | 1.00E+00 | 1.00E+00 |
| Caffeine Metabolism                        | 24    | 0.82     | 1    | 5.70E-01 | 1.00E+00 | 1.00E+00 |
| Estrone Metabolism                         | 24    | 0.82     | 1    | 5.70E-01 | 1.00E+00 | 1.00E+00 |
| Glycolysis                                 | 25    | 0.85     | 1    | 5.85E-01 | 1.00E+00 | 1.00E+00 |
| Cysteine Metabolism                        | 26    | 0.89     | 1    | 6.00E-01 | 1.00E+00 | 1.00E+00 |
| Folate Metabolism                          | 29    | 0.99     | 1    | 6.40E-01 | 1.00E+00 | 1.00E+00 |
| Lysine Degradation                         | 30    | 1.03     | 1    | 6.53E-01 | 1.00E+00 | 1.00E+00 |
| Citric Acid Cycle                          | 32    | 1.09     | 1    | 6.77E-01 | 1.00E+00 | 1.00E+00 |
| Amino Sugar Metabolism                     | 33    | 1.13     | 1    | 6.88E-01 | 1.00E+00 | 1.00E+00 |
| Beta-Alanine Metabolism                    | 34    | 1.16     | 1    | 6.99E-01 | 1.00E+00 | 1.00E+00 |
| Gluconeogenesis                            | 35    | 1.20     | 1    | 7.10E-01 | 1.00E+00 | 1.00E+00 |
| Tyrosine Metabolism                        | 72    | 2.46     | 2    | 7.21E-01 | 1.00E+00 | 1.00E+00 |
| Nicotinate and Nicotinamide Metabolism     | 37    | 1.26     | 1    | 7.30E-01 | 1.00E+00 | 1.00E+00 |
| Retinol Metabolism                         | 37    | 1.26     | 1    | 7.30E-01 | 1.00E+00 | 1.00E+00 |
| Purine Metabolism                          | 74    | 2.53     | 2    | 7.35E-01 | 1.00E+00 | 1.00E+00 |
| Propanoate Metabolism                      | 42    | 1.44     | 1    | 7.75E-01 | 1.00E+00 | 1.00E+00 |
| Pyruvate Metabolism                        | 48    | 1.64     | 1    | 8.19E-01 | 1.00E+00 | 1.00E+00 |
| Glutamate Metabolism                       | 49    | 1.67     | 1    | 8.26E-01 | 1.00E+00 | 1.00E+00 |
| Valine, Leucine and Isoleucine Degradation | 60    | 2.05     | 1    | 8.84E-01 | 1.00E+00 | 1.00E+00 |
| Arachidonic Acid Metabolism                | 69    | 2.36     | 1    | 9.17E-01 | 1.00E+00 | 1.00E+00 |

**Table S11.** Data related to the over-representation analysis (ORA) of blood plasma metabolites with an abnormal concentration in overweight females, presented in Figure S9.

|                                                                    | total | expected | hits | Raw p    | Holm p   | FDR      |
|--------------------------------------------------------------------|-------|----------|------|----------|----------|----------|
| Arginine and Proline Metabolism                                    | 53    | 2.17     | 6    | 1.79E-02 | 1.00E+00 | 9.00E-01 |
| Phenylalanine and Tyrosine Metabolism                              | 28    | 1.15     | 4    | 2.45E-02 | 1.00E+00 | 9.00E-01 |
| Urea Cycle                                                         | 29    | 1.19     | 4    | 2.75E-02 | 1.00E+00 | 9.00E-01 |
| Androgen and Estrogen Metabolism                                   | 33    | 1.35     | 4    | 4.21E-02 | 1.00E+00 | 1.00E+00 |
| Steroidogenesis                                                    | 43    | 1.76     | 4    | 9.45E-02 | 1.00E+00 | 1.00E+00 |
| Glutathione Metabolism                                             | 21    | 0.86     | 2    | 2.12E-01 | 1.00E+00 | 1.00E+00 |
| Glycine and Serine Metabolism                                      | 59    | 2.42     | 4    | 2.19E-01 | 1.00E+00 | 1.00E+00 |
| Tryptophan Metabolism                                              | 60    | 2.46     | 4    | 2.28E-01 | 1.00E+00 | 1.00E+00 |
| Androstenedione Metabolism                                         | 24    | 0.98     | 2    | 2.58E-01 | 1.00E+00 | 1.00E+00 |
| Estrone Metabolism                                                 | 24    | 0.98     | 2    | 2.58E-01 | 1.00E+00 | 1.00E+00 |
| Selenoamino Acid Metabolism                                        | 28    | 1.15     | 2    | 3.20E-01 | 1.00E+00 | 1.00E+00 |
| Malate-Aspartate Shuttle                                           | 10    | 0.41     | 1    | 3.43E-01 | 1.00E+00 | 1.00E+00 |
| D-Arginine and D-Ornithine Metabolism                              | 11    | 0.45     | 1    | 3.71E-01 | 1.00E+00 | 1.00E+00 |
| Glucose-Alanine Cycle                                              | 13    | 0.53     | 1    | 4.22E-01 | 1.00E+00 | 1.00E+00 |
| Thyroid hormone synthesis                                          | 13    | 0.53     | 1    | 4.22E-01 | 1.00E+00 | 1.00E+00 |
| Aspartate Metabolism                                               | 35    | 1.44     | 2    | 4.26E-01 | 1.00E+00 | 1.00E+00 |
| Alanine Metabolism                                                 | 17    | 0.70     | 1    | 5.12E-01 | 1.00E+00 | 1.00E+00 |
| Fatty acid Metabolism                                              | 43    | 1.76     | 2    | 5.36E-01 | 1.00E+00 | 1.00E+00 |
| Mitochondrial Electron Transport Chain                             | 19    | 0.78     | 1    | 5.52E-01 | 1.00E+00 | 1.00E+00 |
| Catecholamine Biosynthesis                                         | 20    | 0.82     | 1    | 5.71E-01 | 1.00E+00 | 1.00E+00 |
| Tyrosine Metabolism                                                | 72    | 2.95     | 3    | 5.79E-01 | 1.00E+00 | 1.00E+00 |
| Glutamate Metabolism                                               | 49    | 2.01     | 2    | 6.09E-01 | 1.00E+00 | 1.00E+00 |
| Mitochondrial Beta-Oxidation of Short Chain Saturated Fatty Acids  | 27    | 1.11     | 1    | 6.82E-01 | 1.00E+00 | 1.00E+00 |
| Mitochondrial Beta-Oxidation of Medium Chain Saturated Fatty Acids | 27    | 1.11     | 1    | 6.82E-01 | 1.00E+00 | 1.00E+00 |
| Ammonia Recycling                                                  | 32    | 1.31     | 1    | 7.44E-01 | 1.00E+00 | 1.00E+00 |
| Citric Acid Cycle                                                  | 32    | 1.31     | 1    | 7.44E-01 | 1.00E+00 | 1.00E+00 |
| Beta-Alanine Metabolism                                            | 34    | 1.39     | 1    | 7.65E-01 | 1.00E+00 | 1.00E+00 |
| Fatty Acid Elongation In Mitochondria                              | 35    | 1.44     | 1    | 7.75E-01 | 1.00E+00 | 1.00E+00 |
| Retinol Metabolism                                                 | 37    | 1.52     | 1    | 7.94E-01 | 1.00E+00 | 1.00E+00 |
| Porphyrin Metabolism                                               | 40    | 1.64     | 1    | 8.19E-01 | 1.00E+00 | 1.00E+00 |
| Sphingolipid Metabolism                                            | 40    | 1.64     | 1    | 8.19E-01 | 1.00E+00 | 1.00E+00 |
| Purine Metabolism                                                  | 74    | 3.04     | 2    | 8.23E-01 | 1.00E+00 | 1.00E+00 |
| Histidine Metabolism                                               | 43    | 1.76     | 1    | 8.41E-01 | 1.00E+00 | 1.00E+00 |
| Warburg Effect                                                     | 58    | 2.38     | 1    | 9.18E-01 | 1.00E+00 | 1.00E+00 |
| Bile Acid Biosynthesis                                             | 65    | 2.67     | 1    | 9.40E-01 | 1.00E+00 | 1.00E+00 |

**Table S12.** Data related to the over-representation analysis (ORA) of blood plasma metabolites with an abnormal concentration in obese patients (stage 1 obesity in females), presented in Figure S10.

|                                                                    | total | expected | hits | Raw p    | Holm p   | FDR      |
|--------------------------------------------------------------------|-------|----------|------|----------|----------|----------|
| Steroidogenesis                                                    | 43    | 5.92     | 19   | 6.00E-07 | 5.88E-05 | 5.88E-05 |
| Androgen and Estrogen Metabolism                                   | 33    | 4.54     | 11   | 2.96E-03 | 2.87E-01 | 1.45E-01 |
| Glycine and Serine Metabolism                                      | 59    | 8.12     | 15   | 1.00E-02 | 9.63E-01 | 2.74E-01 |
| Androstenedione Metabolism                                         | 24    | 3.30     | 8    | 1.12E-02 | 1.00E+00 | 2.74E-01 |
| Aspartate Metabolism                                               | 35    | 4.82     | 10   | 1.52E-02 | 1.00E+00 | 2.98E-01 |
| Arginine and Proline Metabolism                                    | 53    | 7.30     | 13   | 2.20E-02 | 1.00E+00 | 3.59E-01 |
| Urea Cycle                                                         | 29    | 3.99     | 8    | 3.57E-02 | 1.00E+00 | 5.00E-01 |
| Ammonia Recycling                                                  | 32    | 4.41     | 8    | 6.10E-02 | 1.00E+00 | 6.72E-01 |
| Glutamate Metabolism                                               | 49    | 6.75     | 11   | 6.17E-02 | 1.00E+00 | 6.72E-01 |
| Homocysteine Degradation                                           | 9     | 1.24     | 3    | 1.15E-01 | 1.00E+00 | 1.00E+00 |
| Malate-Aspartate Shuttle                                           | 10    | 1.38     | 3    | 1.48E-01 | 1.00E+00 | 1.00E+00 |
| Glutathione Metabolism                                             | 21    | 2.89     | 5    | 1.51E-01 | 1.00E+00 | 1.00E+00 |
| Phenylalanine and Tyrosine Metabolism                              | 28    | 3.86     | 6    | 1.77E-01 | 1.00E+00 | 1.00E+00 |
| Citric Acid Cycle                                                  | 32    | 4.41     | 6    | 2.71E-01 | 1.00E+00 | 1.00E+00 |
| Porphyrin Metabolism                                               | 40    | 5.51     | 7    | 3.07E-01 | 1.00E+00 | 1.00E+00 |
| Beta-Alanine Metabolism                                            | 34    | 4.68     | 6    | 3.22E-01 | 1.00E+00 | 1.00E+00 |
| Histidine Metabolism                                               | 43    | 5.92     | 7    | 3.79E-01 | 1.00E+00 | 1.00E+00 |
| Alanine Metabolism                                                 | 17    | 2.34     | 3    | 4.22E-01 | 1.00E+00 | 1.00E+00 |
| Estrone Metabolism                                                 | 24    | 3.30     | 4    | 4.26E-01 | 1.00E+00 | 1.00E+00 |
| D-Arginine and D-Ornithine Metabolism                              | 11    | 1.51     | 2    | 4.60E-01 | 1.00E+00 | 1.00E+00 |
| Cysteine Metabolism                                                | 26    | 3.58     | 4    | 4.91E-01 | 1.00E+00 | 1.00E+00 |
| Mitochondrial Electron Transport Chain                             | 19    | 2.62     | 3    | 4.98E-01 | 1.00E+00 | 1.00E+00 |
| Taurine and Hypotaurine Metabolism                                 | 12    | 1.65     | 2    | 5.08E-01 | 1.00E+00 | 1.00E+00 |
| Nucleotide Sugars Metabolism                                       | 20    | 2.75     | 3    | 5.35E-01 | 1.00E+00 | 1.00E+00 |
| Threonine and 2-Oxobutanoate Degradation                           | 20    | 2.75     | 3    | 5.35E-01 | 1.00E+00 | 1.00E+00 |
| Glucose-Alanine Cycle                                              | 13    | 1.79     | 2    | 5.53E-01 | 1.00E+00 | 1.00E+00 |
| Methionine Metabolism                                              | 43    | 5.92     | 6    | 5.56E-01 | 1.00E+00 | 1.00E+00 |
| Carnitine Synthesis                                                | 22    | 3.03     | 3    | 6.03E-01 | 1.00E+00 | 1.00E+00 |
| Lysine Degradation                                                 | 30    | 4.13     | 4    | 6.11E-01 | 1.00E+00 | 1.00E+00 |
| Propanoate Metabolism                                              | 42    | 5.78     | 5    | 7.09E-01 | 1.00E+00 | 1.00E+00 |
| Warburg Effect                                                     | 58    | 7.99     | 7    | 7.10E-01 | 1.00E+00 | 1.00E+00 |
| Pyrimidine Metabolism                                              | 59    | 8.12     | 7    | 7.28E-01 | 1.00E+00 | 1.00E+00 |
| Phenylacetate Metabolism                                           | 9     | 1.24     | 1    | 7.38E-01 | 1.00E+00 | 1.00E+00 |
| Mitochondrial Beta-Oxidation of Short Chain Saturated Fatty Acids  | 27    | 3.72     | 3    | 7.42E-01 | 1.00E+00 | 1.00E+00 |
| Tryptophan Metabolism                                              | 60    | 8.26     | 7    | 7.44E-01 | 1.00E+00 | 1.00E+00 |
| Butyrate Metabolism                                                | 19    | 2.62     | 2    | 7.61E-01 | 1.00E+00 | 1.00E+00 |
| Nicotinate and Nicotinamide Metabolism                             | 37    | 5.09     | 4    | 7.74E-01 | 1.00E+00 | 1.00E+00 |
| Retinol Metabolism                                                 | 37    | 5.09     | 4    | 7.74E-01 | 1.00E+00 | 1.00E+00 |
| Pyruvaldehyde Degradation                                          | 10    | 1.38     | 1    | 7.74E-01 | 1.00E+00 | 1.00E+00 |
| Catecholamine Biosynthesis                                         | 20    | 2.75     | 2    | 7.86E-01 | 1.00E+00 | 1.00E+00 |
| Glycerol Phosphate Shuttle                                         | 11    | 1.51     | 1    | 8.06E-01 | 1.00E+00 | 1.00E+00 |
| Betaine Metabolism                                                 | 21    | 2.89     | 2    | 8.09E-01 | 1.00E+00 | 1.00E+00 |
| Purine Metabolism                                                  | 74    | 10.20    | 8    | 8.26E-01 | 1.00E+00 | 1.00E+00 |
| Amino Sugar Metabolism                                             | 33    | 4.54     | 3    | 8.56E-01 | 1.00E+00 | 1.00E+00 |
| Ketone Body Metabolism                                             | 13    | 1.79     | 1    | 8.56E-01 | 1.00E+00 | 1.00E+00 |
| Thyroid hormone synthesis                                          | 13    | 1.79     | 1    | 8.56E-01 | 1.00E+00 | 1.00E+00 |
| Valine, Leucine and Isoleucine Degradation                         | 60    | 8.26     | 6    | 8.59E-01 | 1.00E+00 | 1.00E+00 |
| Caffeine Metabolism                                                | 24    | 3.30     | 2    | 8.65E-01 | 1.00E+00 | 1.00E+00 |
| Vitamin K Metabolism                                               | 14    | 1.93     | 1    | 8.76E-01 | 1.00E+00 | 1.00E+00 |
| Tyrosine Metabolism                                                | 72    | 9.91     | 7    | 8.91E-01 | 1.00E+00 | 1.00E+00 |
| Oxidation of Branched Chain Fatty Acids                            | 26    | 3.58     | 2    | 8.94E-01 | 1.00E+00 | 1.00E+00 |
| Phytanic Acid Peroxisomal Oxidation                                | 26    | 3.58     | 2    | 8.94E-01 | 1.00E+00 | 1.00E+00 |
| Mitochondrial Beta-Oxidation of Medium Chain Saturated Fatty Acids | 27    | 3.72     | 2    | 9.06E-01 | 1.00E+00 | 1.00E+00 |
| Selenoamino Acid Metabolism                                        | 28    | 3.86     | 2    | 9.17E-01 | 1.00E+00 | 1.00E+00 |
| Folate Metabolism                                                  | 29    | 3.99     | 2    | 9.26E-01 | 1.00E+00 | 1.00E+00 |
| Spermidine and Spermine Biosynthesis                               | 18    | 2.48     | 1    | 9.32E-01 | 1.00E+00 | 1.00E+00 |
| Arachidonic Acid Metabolism                                        | 69    | 9.50     | 6    | 9.34E-01 | 1.00E+00 | 1.00E+00 |
| Starch and Sucrose Metabolism                                      | 31    | 4.27     | 2    | 9.42E-01 | 1.00E+00 | 1.00E+00 |
| Vitamin B6 Metabolism                                              | 20    | 2.75     | 1    | 9.50E-01 | 1.00E+00 | 1.00E+00 |
| Riboflavin Metabolism                                              | 20    | 2.75     | 1    | 9.50E-01 | 1.00E+00 | 1.00E+00 |
| Lactose Synthesis                                                  | 20    | 2.75     | 1    | 9.50E-01 | 1.00E+00 | 1.00E+00 |
| Pantothenate and CoA Biosynthesis                                  | 21    | 2.89     | 1    | 9.57E-01 | 1.00E+00 | 1.00E+00 |
| Bile Acid Biosynthesis                                             | 65    | 8.95     | 5    | 9.60E-01 | 1.00E+00 | 1.00E+00 |
| Sulfate/Sulfite Metabolism                                         | 22    | 3.03     | 1    | 9.63E-01 | 1.00E+00 | 1.00E+00 |
| Transfer of Acetyl Groups into Mitochondria                        | 22    | 3.03     | 1    | 9.63E-01 | 1.00E+00 | 1.00E+00 |
| Pyruvate Metabolism                                                | 48    | 6.61     | 3    | 9.72E-01 | 1.00E+00 | 1.00E+00 |
| Glycerolipid Metabolism                                            | 25    | 3.44     | 1    | 9.77E-01 | 1.00E+00 | 1.00E+00 |
| Plasmalogen Synthesis                                              | 26    | 3.58     | 1    | 9.80E-01 | 1.00E+00 | 1.00E+00 |
| Sphingolipid Metabolism                                            | 40    | 5.51     | 2    | 9.82E-01 | 1.00E+00 | 1.00E+00 |
| Mitochondrial Beta-Oxidation of Long Chain Saturated Fatty Acids   | 28    | 3.86     | 1    | 9.85E-01 | 1.00E+00 | 1.00E+00 |
| Phospholipid Biosynthesis                                          | 29    | 3.99     | 1    | 9.87E-01 | 1.00E+00 | 1.00E+00 |
| Pentose Phosphate Pathway                                          | 29    | 3.99     | 1    | 9.87E-01 | 1.00E+00 | 1.00E+00 |
| Fatty acid Metabolism                                              | 43    | 5.92     | 2    | 9.88E-01 | 1.00E+00 | 1.00E+00 |
| Fatty Acid Elongation In Mitochondria                              | 35    | 4.82     | 1    | 9.95E-01 | 1.00E+00 | 1.00E+00 |
| Gluconeogenesis                                                    | 35    | 4.82     | 1    | 9.95E-01 | 1.00E+00 | 1.00E+00 |
| Galactose Metabolism                                               | 38    | 5.23     | 1    | 9.97E-01 | 1.00E+00 | 1.00E+00 |
| Steroid Biosynthesis                                               | 48    | 6.61     | 1    | 9.99E-01 | 1.00E+00 | 1.00E+00 |

**Table S13.** Data related to the over-representation analysis (ORA) of blood plasma metabolites with an abnormal concentration in obese patients (stage 2 obesity in females), presented in Figure S11.

|                                                                    | total | expected | hits | Raw p    | Holm p   | FDR      |
|--------------------------------------------------------------------|-------|----------|------|----------|----------|----------|
| Steroidogenesis                                                    | 43    | 2.81     | 13   | 9.82E-07 | 9.62E-05 | 9.62E-05 |
| Androgen and Estrogen Metabolism                                   | 33    | 2.16     | 7    | 4.09E-03 | 3.96E-01 | 2.00E-01 |
| Androstenedione Metabolism                                         | 24    | 1.57     | 4    | 6.59E-02 | 1.00E+00 | 1.00E+00 |
| Malate-Aspartate Shuttle                                           | 10    | 0.65     | 2    | 1.35E-01 | 1.00E+00 | 1.00E+00 |
| Aspartate Metabolism                                               | 35    | 2.29     | 4    | 1.91E-01 | 1.00E+00 | 1.00E+00 |
| Estrone Metabolism                                                 | 24    | 1.57     | 3    | 2.04E-01 | 1.00E+00 | 1.00E+00 |
| Retinol Metabolism                                                 | 37    | 2.42     | 4    | 2.19E-01 | 1.00E+00 | 1.00E+00 |
| Phenylalanine and Tyrosine Metabolism                              | 28    | 1.83     | 3    | 2.75E-01 | 1.00E+00 | 1.00E+00 |
| Urea Cycle                                                         | 29    | 1.90     | 3    | 2.94E-01 | 1.00E+00 | 1.00E+00 |
| Citric Acid Cycle                                                  | 32    | 2.09     | 3    | 3.50E-01 | 1.00E+00 | 1.00E+00 |
| Amino Sugar Metabolism                                             | 33    | 2.16     | 3    | 3.68E-01 | 1.00E+00 | 1.00E+00 |
| Catecholamine Biosynthesis                                         | 20    | 1.31     | 2    | 3.81E-01 | 1.00E+00 | 1.00E+00 |
| Beta-Alanine Metabolism                                            | 34    | 2.22     | 3    | 3.87E-01 | 1.00E+00 | 1.00E+00 |
| Homocysteine Degradation                                           | 9     | 0.59     | 1    | 4.57E-01 | 1.00E+00 | 1.00E+00 |
| Cysteine Metabolism                                                | 26    | 1.70     | 2    | 5.17E-01 | 1.00E+00 | 1.00E+00 |
| Glycerol Phosphate Shuttle                                         | 11    | 0.72     | 1    | 5.27E-01 | 1.00E+00 | 1.00E+00 |
| Histidine Metabolism                                               | 43    | 2.81     | 3    | 5.44E-01 | 1.00E+00 | 1.00E+00 |
| Glycine and Serine Metabolism                                      | 59    | 3.86     | 4    | 5.50E-01 | 1.00E+00 | 1.00E+00 |
| Taurine and Hypotaurine Metabolism                                 | 12    | 0.79     | 1    | 5.58E-01 | 1.00E+00 | 1.00E+00 |
| Glucose-Alanine Cycle                                              | 13    | 0.85     | 1    | 5.87E-01 | 1.00E+00 | 1.00E+00 |
| Ammonia Recycling                                                  | 32    | 2.09     | 2    | 6.33E-01 | 1.00E+00 | 1.00E+00 |
| Glutamate Metabolism                                               | 49    | 3.21     | 3    | 6.36E-01 | 1.00E+00 | 1.00E+00 |
| Alanine Metabolism                                                 | 17    | 1.11     | 1    | 6.86E-01 | 1.00E+00 | 1.00E+00 |
| Arginine and Proline Metabolism                                    | 53    | 3.47     | 3    | 6.90E-01 | 1.00E+00 | 1.00E+00 |
| Tyrosine Metabolism                                                | 72    | 4.71     | 4    | 7.11E-01 | 1.00E+00 | 1.00E+00 |
| Mitochondrial Electron Transport Chain                             | 19    | 1.24     | 1    | 7.27E-01 | 1.00E+00 | 1.00E+00 |
| Warburg Effect                                                     | 58    | 3.79     | 3    | 7.48E-01 | 1.00E+00 | 1.00E+00 |
| Glutathione Metabolism                                             | 21    | 1.37     | 1    | 7.62E-01 | 1.00E+00 | 1.00E+00 |
| Betaine Metabolism                                                 | 21    | 1.37     | 1    | 7.62E-01 | 1.00E+00 | 1.00E+00 |
| Sulfate/Sulfite Metabolism                                         | 22    | 1.44     | 1    | 7.78E-01 | 1.00E+00 | 1.00E+00 |
| Mitochondrial Beta-Oxidation of Short Chain Saturated Fatty Acids  | 27    | 1.77     | 1    | 8.43E-01 | 1.00E+00 | 1.00E+00 |
| Mitochondrial Beta-Oxidation of Medium Chain Saturated Fatty Acids | 27    | 1.77     | 1    | 8.43E-01 | 1.00E+00 | 1.00E+00 |
| Arachidonic Acid Metabolism                                        | 69    | 4.51     | 3    | 8.47E-01 | 1.00E+00 | 1.00E+00 |
| Selenoamino Acid Metabolism                                        | 28    | 1.83     | 1    | 8.54E-01 | 1.00E+00 | 1.00E+00 |
| Phospholipid Biosynthesis                                          | 29    | 1.90     | 1    | 8.63E-01 | 1.00E+00 | 1.00E+00 |
| Folate Metabolism                                                  | 29    | 1.90     | 1    | 8.63E-01 | 1.00E+00 | 1.00E+00 |
| Lysine Degradation                                                 | 30    | 1.96     | 1    | 8.73E-01 | 1.00E+00 | 1.00E+00 |
| Purine Metabolism                                                  | 74    | 4.84     | 3    | 8.80E-01 | 1.00E+00 | 1.00E+00 |
| Fatty Acid Elongation In Mitochondria                              | 35    | 2.29     | 1    | 9.10E-01 | 1.00E+00 | 1.00E+00 |
| Nicotinate and Nicotinamide Metabolism                             | 37    | 2.42     | 1    | 9.22E-01 | 1.00E+00 | 1.00E+00 |
| Porphyrin Metabolism                                               | 40    | 2.62     | 1    | 9.37E-01 | 1.00E+00 | 1.00E+00 |
| Sphingolipid Metabolism                                            | 40    | 2.62     | 1    | 9.37E-01 | 1.00E+00 | 1.00E+00 |
| Bile Acid Biosynthesis                                             | 65    | 4.25     | 2    | 9.38E-01 | 1.00E+00 | 1.00E+00 |
| Propanoate Metabolism                                              | 42    | 2.75     | 1    | 9.45E-01 | 1.00E+00 | 1.00E+00 |
| Methionine Metabolism                                              | 43    | 2.81     | 1    | 9.49E-01 | 1.00E+00 | 1.00E+00 |
| Fatty acid Metabolism                                              | 43    | 2.81     | 1    | 9.49E-01 | 1.00E+00 | 1.00E+00 |
| Pyrimidine Metabolism                                              | 59    | 3.86     | 1    | 9.84E-01 | 1.00E+00 | 1.00E+00 |
| Valine, Leucine and Isoleucine Degradation                         | 60    | 3.93     | 1    | 9.85E-01 | 1.00E+00 | 1.00E+00 |
| Tryptophan Metabolism                                              | 60    | 3.93     | 1    | 9.85E-01 | 1.00E+00 | 1.00E+00 |

**Table S14.** Data related to the over-representation analysis (ORA) of blood plasma metabolites with an abnormal concentration in obese patients (stage 3 obesity in females), presented in Figure S12.

|                                                                    | total | expected | hits | Raw p    | Holm p   | FDR      |
|--------------------------------------------------------------------|-------|----------|------|----------|----------|----------|
| Steroidogenesis                                                    | 43    | 2.86     | 17   | 1.42E-10 | 1.39E-08 | 1.39E-08 |
| Androgen and Estrogen Metabolism                                   | 33    | 2.19     | 10   | 2.34E-05 | 2.27E-03 | 1.15E-03 |
| Androstenedione Metabolism                                         | 24    | 1.59     | 7    | 5.85E-04 | 5.62E-02 | 1.91E-02 |
| Arginine and Proline Metabolism                                    | 53    | 3.52     | 6    | 1.33E-01 | 1.00E+00 | 1.00E+00 |
| Malate-Aspartate Shuttle                                           | 10    | 0.66     | 2    | 1.39E-01 | 1.00E+00 | 1.00E+00 |
| Glycine and Serine Metabolism                                      | 59    | 3.92     | 6    | 1.91E-01 | 1.00E+00 | 1.00E+00 |
| Aspartate Metabolism                                               | 35    | 2.32     | 4    | 1.98E-01 | 1.00E+00 | 1.00E+00 |
| Estrone Metabolism                                                 | 24    | 1.59     | 3    | 2.10E-01 | 1.00E+00 | 1.00E+00 |
| Retinol Metabolism                                                 | 37    | 2.46     | 4    | 2.27E-01 | 1.00E+00 | 1.00E+00 |
| Phenylalanine and Tyrosine Metabolism                              | 28    | 1.86     | 3    | 2.83E-01 | 1.00E+00 | 1.00E+00 |
| Urea Cycle                                                         | 29    | 1.93     | 3    | 3.02E-01 | 1.00E+00 | 1.00E+00 |
| Ammonia Recycling                                                  | 32    | 2.12     | 3    | 3.58E-01 | 1.00E+00 | 1.00E+00 |
| Mitochondrial Electron Transport Chain                             | 19    | 1.26     | 2    | 3.63E-01 | 1.00E+00 | 1.00E+00 |
| Homocysteine Degradation                                           | 9     | 0.60     | 1    | 4.63E-01 | 1.00E+00 | 1.00E+00 |
| Mitochondrial Beta-Oxidation of Short Chain Saturated Fatty Acids  | 27    | 1.79     | 2    | 5.46E-01 | 1.00E+00 | 1.00E+00 |
| Ketone Body Metabolism                                             | 13    | 0.86     | 1    | 5.93E-01 | 1.00E+00 | 1.00E+00 |
| Glucose-Alanine Cycle                                              | 13    | 0.86     | 1    | 5.93E-01 | 1.00E+00 | 1.00E+00 |
| Lysine Degradation                                                 | 30    | 1.99     | 2    | 6.05E-01 | 1.00E+00 | 1.00E+00 |
| Citric Acid Cycle                                                  | 32    | 2.12     | 2    | 6.41E-01 | 1.00E+00 | 1.00E+00 |
| Glutamate Metabolism                                               | 49    | 3.25     | 3    | 6.46E-01 | 1.00E+00 | 1.00E+00 |
| Beta-Alanine Metabolism                                            | 34    | 2.26     | 2    | 6.74E-01 | 1.00E+00 | 1.00E+00 |
| Alanine Metabolism                                                 | 17    | 1.13     | 1    | 6.92E-01 | 1.00E+00 | 1.00E+00 |
| Butyrate Metabolism                                                | 19    | 1.26     | 1    | 7.32E-01 | 1.00E+00 | 1.00E+00 |
| Purine Metabolism                                                  | 74    | 4.91     | 4    | 7.43E-01 | 1.00E+00 | 1.00E+00 |
| Catecholamine Biosynthesis                                         | 20    | 1.33     | 1    | 7.50E-01 | 1.00E+00 | 1.00E+00 |
| Warburg Effect                                                     | 58    | 3.85     | 3    | 7.58E-01 | 1.00E+00 | 1.00E+00 |
| Glutathione Metabolism                                             | 21    | 1.39     | 1    | 7.67E-01 | 1.00E+00 | 1.00E+00 |
| Betaine Metabolism                                                 | 21    | 1.39     | 1    | 7.67E-01 | 1.00E+00 | 1.00E+00 |
| Tryptophan Metabolism                                              | 60    | 3.98     | 3    | 7.78E-01 | 1.00E+00 | 1.00E+00 |
| Sulfate/Sulfite Metabolism                                         | 22    | 1.46     | 1    | 7.83E-01 | 1.00E+00 | 1.00E+00 |
| Carnitine Synthesis                                                | 22    | 1.46     | 1    | 7.83E-01 | 1.00E+00 | 1.00E+00 |
| Histidine Metabolism                                               | 43    | 2.86     | 2    | 7.95E-01 | 1.00E+00 | 1.00E+00 |
| Fatty acid Metabolism                                              | 43    | 2.86     | 2    | 7.95E-01 | 1.00E+00 | 1.00E+00 |
| Cysteine Metabolism                                                | 26    | 1.73     | 1    | 8.36E-01 | 1.00E+00 | 1.00E+00 |
| Oxidation of Branched Chain Fatty Acids                            | 26    | 1.73     | 1    | 8.36E-01 | 1.00E+00 | 1.00E+00 |
| Phytanic Acid Peroxisomal Oxidation                                | 26    | 1.73     | 1    | 8.36E-01 | 1.00E+00 | 1.00E+00 |
| Mitochondrial Beta-Oxidation of Medium Chain Saturated Fatty Acids | 27    | 1.79     | 1    | 8.47E-01 | 1.00E+00 | 1.00E+00 |
| Folate Metabolism                                                  | 29    | 1.93     | 1    | 8.68E-01 | 1.00E+00 | 1.00E+00 |
| Tyrosine Metabolism                                                | 72    | 4.78     | 3    | 8.74E-01 | 1.00E+00 | 1.00E+00 |
| Amino Sugar Metabolism                                             | 33    | 2.19     | 1    | 9.00E-01 | 1.00E+00 | 1.00E+00 |
| Fatty Acid Elongation In Mitochondria                              | 35    | 2.32     | 1    | 9.13E-01 | 1.00E+00 | 1.00E+00 |
| Valine, Leucine and Isoleucine Degradation                         | 60    | 3.98     | 2    | 9.21E-01 | 1.00E+00 | 1.00E+00 |
| Nicotinate and Nicotinamide Metabolism                             | 37    | 2.46     | 1    | 9.25E-01 | 1.00E+00 | 1.00E+00 |
| Porphyrin Metabolism                                               | 40    | 2.66     | 1    | 9.39E-01 | 1.00E+00 | 1.00E+00 |
| Bile Acid Biosynthesis                                             | 65    | 4.32     | 2    | 9.41E-01 | 1.00E+00 | 1.00E+00 |
| Propanoate Metabolism                                              | 42    | 2.79     | 1    | 9.48E-01 | 1.00E+00 | 1.00E+00 |
| Methionine Metabolism                                              | 43    | 2.86     | 1    | 9.51E-01 | 1.00E+00 | 1.00E+00 |
| Arachidonic Acid Metabolism                                        | 69    | 4.58     | 1    | 9.93E-01 | 1.00E+00 | 1.00E+00 |

**Table S15.** Context support (Z scores calculated by annotation algorithm) for annotating candidate compounds.

| m/z     | KEGG ID | Z-score | Metabolite name                                                                                                |
|---------|---------|---------|----------------------------------------------------------------------------------------------------------------|
| 83.059  | C05827  | -2.22   | Methylimidazole acetaldehyde; 1-Methylimidazole-4-acetaldehyde; Methylimidazoleacetaldehyde                    |
| 84.044  | C01879  | -3.08   | 5-Oxoproline; Pidolic acid; Pyroglutamic acid; 5-Pyrrolidone-2-carboxylic acid; Pyroglutamate; 5-Oxo-L-proline |
| 84.081  | C05936  | -2.69   | N4-Acetylamino butanal; 4-Acetamidobutanal                                                                     |
| 84.959  | C01563  | -2.78   | Carbamate; Carbamic acid; Aminoformic acid                                                                     |
| 84.991  | C01353  | -2.23   | Carbonic acid; Dihydrogen carbonate; H <sub>2</sub> CO <sub>3</sub>                                            |
| 85.029  | C00086  | -4.27   | Urea; Carbamide                                                                                                |
| 85.963  | C01563  | -2.7    | Carbamate; Carbamic acid; Aminoformic acid                                                                     |
| 86.096  | C00410  | -4.84   | Progesterone; 4-Pregnene-3,20-dione                                                                            |
| 86.956  | C01563  | -3.58   | Carbamate; Carbamic acid; Aminoformic acid                                                                     |
| 86.963  | C01563  | -2.62   | Carbamate; Carbamic acid; Aminoformic acid                                                                     |
| 86.993  | C01353  | -3.35   | Carbonic acid; Dihydrogen carbonate; H <sub>2</sub> CO <sub>3</sub>                                            |
| 87.994  | C05828  | -3.54   | Methylimidazoleacetic acid; Tele-methylimidazoleacetic acid; 1-Methyl-4-imidazoleacetic acid                   |
| 88.076  | C00555  | -2.36   | 4-Aminobutyraldehyde; 4-Aminobutanal                                                                           |
| 88.952  | C01563  | -3.76   | Carbamate; Carbamic acid; Aminoformic acid                                                                     |
| 88.981  | C00555  | -3.62   | 4-Aminobutyraldehyde; 4-Aminobutanal                                                                           |
| 90.976  | C00197  | -2.36   | 3-Phospho-D-glycerate; D-Glycerate 3-phosphate; 3-Phospho-(R)-glycerate; 3-Phosphoglycerate                    |
| 91.054  | C00041  | -1.91   | L-Alanine; L-2-Aminopropionic acid; L-alpha-Alanine                                                            |
| 91.054  | C05688  | -1.94   | L-Selenocysteine                                                                                               |
| 91.054  | C05688  | -2.11   | L-Selenocysteine                                                                                               |
| 92.049  | C00037  | -1.78   | Glycine; Aminoacetic acid; Gly                                                                                 |
| 92.949  | C01563  | -3.72   | Carbamate; Carbamic acid; Aminoformic acid                                                                     |
| 93.012  | C15604  | -2.02   | Prenal                                                                                                         |
| 93.045  | C00042  | -3.28   | Succinate; Succinic acid; Butanedionic acid; Ethylenesuccinic acid                                             |
| 93.045  | C00256  | -1.87   | (R)-Lactate; D-Lactate; D-Lactic acid; D-2-Hydroxypropionic acid; D-2-Hydroxypropionic acid                    |
| 93.045  | C05670  | -4.53   | 3-Aminopropionitrile; beta-Aminopropionitrile                                                                  |
| 93.057  | C00062  | -2.96   | L-Arginine; (S)-2-Amino-5-guanidinovaleric acid; L-Arg                                                         |
| 96.014  | C00546  | -3.43   | Methylglyoxal; Pyruvaldehyde; Pyruvic aldehyde; 2-Ketopropionaldehyde; 2-Oxopropanal                           |
| 96.044  | C00931  | -2.4    | Porphobilinogen                                                                                                |
| 96.044  | C05665  | -1.76   | 3-Aminopropanal; beta-Aminopropion aldehyde                                                                    |
| 96.078  | C05335  | -2.45   | L-Selenomethionine                                                                                             |
| 96.958  | C00152  | -3.25   | L-Asparagine; 2-Aminosuccinamic acid                                                                           |
| 97.028  | C00937  | -3.35   | (R)-Lactaldehyde; D-Lactaldehyde; D-2-Hydroxypropionaldehyde                                                   |
| 97.028  | C05999  | -3.14   | Lactaldehyde; 2-Hydroxypropionaldehyde; 2-Hydroxypropanal                                                      |
| 97.076  | C00986  | -3.36   | 1,3-Diaminopropane; Trimethylenediamine; 1,3-Propanediamine; Propane-1,3-diamine                               |
| 97.969  | C04540  | -1.81   | N4-(Acetyl-beta-D-glucosaminyl)asparagine; N4-(beta-N-Acetyl-D-glucosaminyl)-L-asparagine                      |
| 97.991  | C00122  | -1.77   | Fumarate; Fumaric acid; trans-Butenedioic acid                                                                 |
| 98.949  | C00337  | -1.75   | (S)-Dihydroorotate; (S)-4,5-Dihydroorotate; L-Dihydroorotate; L-Dihydroorotic acid; Dihydro-L-orotic acid      |
| 98.975  | C00122  | -2.29   | Fumarate; Fumaric acid; trans-Butenedioic acid                                                                 |
| 98.995  | C00086  | -2.67   | Urea; Carbamide                                                                                                |
| 99.029  | C00037  | -3.42   | Glycine; Aminoacetic acid; Gly                                                                                 |
| 99.029  | C00151  | -2.54   | L-Amino acid; L-2-Amino acid                                                                                   |
| 99.029  | C00405  | -2.44   | D-Amino acid                                                                                                   |
| 99.029  | C00937  | -2.56   | (R)-Lactaldehyde; D-Lactaldehyde; D-2-Hydroxypropionaldehyde                                                   |
| 99.029  | C05167  | -2.58   | alpha-Amino acid                                                                                               |
| 99.029  | C05999  | -2.76   | Lactaldehyde; 2-Hydroxypropionaldehyde; 2-Hydroxypropanal                                                      |
| 99.043  | C00583  | -2.5    | Propane-1,2-diol; 1,2-Propanediol; Propylene glycol                                                            |
| 99.08   | C02055  | -1.67   | N-Acylglycine                                                                                                  |
| 99.98   | C01563  | -4.19   | Carbamate; Carbamic acid; Aminoformic acid                                                                     |
| 99.98   | C01563  | -4.5    | Carbamate; Carbamic acid; Aminoformic acid                                                                     |
| 100.03  | C00037  | -3.43   | Glycine; Aminoacetic acid; Gly                                                                                 |
| 100.03  | C00151  | -2.76   | L-Amino acid; L-2-Amino acid                                                                                   |
| 100.03  | C00405  | -2.74   | D-Amino acid                                                                                                   |
| 100.03  | C05167  | -2.94   | alpha-Amino acid                                                                                               |
| 100.05  | C00583  | -3.28   | Propane-1,2-diol; 1,2-Propanediol; Propylene glycol                                                            |
| 100.112 | C00410  | -6.76   | Progesterone; 4-Pregnene-3,20-dione                                                                            |
| 100.981 | C01563  | -3.43   | Carbamate; Carbamic acid; Aminoformic acid                                                                     |
| 100.981 | C01563  | -3.56   | Carbamate; Carbamic acid; Aminoformic acid                                                                     |
| 100.981 | C01563  | -3.58   | Carbamate; Carbamic acid; Aminoformic acid                                                                     |
| 100.981 | C01563  | -3.74   | Carbamate; Carbamic acid; Aminoformic acid                                                                     |
| 100.991 | C00086  | -4.19   | Urea; Carbamide                                                                                                |
| 101.007 | C01353  | -1.68   | Carbonic acid; Dihydrogen carbonate; H <sub>2</sub> CO <sub>3</sub>                                            |
| 101.048 | C00583  | -3.55   | Propane-1,2-diol; 1,2-Propanediol; Propylene glycol                                                            |
| 101.059 | C00931  | -2.15   | Porphobilinogen                                                                                                |
| 101.119 | C00410  | -6.2    | Progesterone; 4-Pregnene-3,20-dione                                                                            |
| 101.977 | C01563  | -3.36   | Carbamate; Carbamic acid; Aminoformic acid                                                                     |
| 101.977 | C01563  | -3.47   | Carbamate; Carbamic acid; Aminoformic acid                                                                     |
| 102.055 | C00188  | -2.87   | L-Threonine; 2-Amino-3-hydroxybutyric acid                                                                     |
| 102.055 | C17234  | -2.78   | 2-Aminobut-2-enoate; (2Z)-2-Aminobut-2-enoic acid; 2-Ammoniobut-2-enoate                                       |
| 102.97  | C01563  | -3.32   | Carbamate; Carbamic acid; Aminoformic acid                                                                     |
| 103.039 | C00109  | -2.7    | 2-Oxobutanoate; 2-Ketobutyric acid; 2-Oxobutyric acid; 2-Oxobutyrate; 2-Oxobutanoic acid                       |
| 103.039 | C00232  | -1.74   | Succinate semialdehyde; Succinic semialdehyde; 4-Oxobutanoate                                                  |
| 103.075 | C00931  | -1.73   | Porphobilinogen                                                                                                |
| 103.084 | C00152  | -1.91   | L-Asparagine; 2-Aminosuccinamic acid                                                                           |
| 104.03  | C05642  | -2.23   | Formyl-N-acetyl-5-methoxykynurenamine                                                                          |
| 104.053 | C00073  | -2.33   | L-Methionine; Methionine; L-2-Amino-4methylthiobutyric acid                                                    |
| 104.07  | C02356  | -2.72   | (S)-2-Aminobutanoate; (S)-2-Aminobutanoic acid; (S)-2-Aminobutyric acid                                        |

|         |        |       |                                                                                                               |
|---------|--------|-------|---------------------------------------------------------------------------------------------------------------|
| 104.07  | C05698 | -3.28 | Selenohomocysteine                                                                                            |
| 104.973 | C05172 | -2.86 | Selenophosphoric acid; Selenophosphate                                                                        |
| 105.017 | C00168 | -2.44 | Hydroxypyruvate; Hydroxypyruvic acid; 3-Hydroxypyruvate; 3-Hydroxypyruvic acid                                |
| 105.017 | C01146 | -2.48 | 2-Hydroxy-3-oxopropanoate; Tartronate semialdehyde                                                            |
| 105.034 | C02055 | -2.17 | N-Acylglycine                                                                                                 |
| 105.034 | C02055 | -2.19 | N-Acylglycine                                                                                                 |
| 106.049 | C00065 | -2.98 | L-Serine; L-2-Amino-3-hydroxypropionic acid; L-3-Hydroxy-alanine; Serine                                      |
| 106.049 | C00740 | -3.2  | D-Serine                                                                                                      |
| 108.039 | C00258 | -3.23 | D-Glycerate; Glycerate; (R)-Glycerate; Glyceric acid                                                          |
| 108.987 | C02166 | -1.85 | Leukotriene C4; LTC4                                                                                          |
| 110.008 | C00022 | -2.59 | Pyruvate; Pyruvic acid; 2-Oxopropanoate; 2-Oxopropanoic acid; Pyrroacemic acid                                |
| 110.049 | C05130 | -5.65 | Imidazole-4-acetaldehyde; Imidazole acetaldehyde                                                              |
| 110.103 | C00956 | -3.49 | L-2-Amino adipate; L-alpha-Amino adipate; L-alpha-Amino adipic acid; L-2-Amino adipic acid                    |
| 110.975 | C00086 | -3.2  | Urea; Carbamide                                                                                               |
| 111.01  | C00022 | -2.25 | Pyruvate; Pyruvic acid; 2-Oxopropanoate; 2-Oxopropanoic acid; Pyrroacemic acid                                |
| 111.042 | C05130 | -5.29 | Imidazole-4-acetaldehyde; Imidazole acetaldehyde                                                              |
| 111.053 | C00956 | -2.71 | L-2-Amino adipate; L-alpha-Amino adipate; L-alpha-Amino adipic acid; L-2-Amino adipic acid                    |
| 111.053 | C05130 | -3.6  | Imidazole-4-acetaldehyde; Imidazole acetaldehyde                                                              |
| 111.064 | C05141 | -3.84 | Estrinol; 1,3,5(10)-Estratriene-3,16-alpha,17beta-triol                                                       |
| 111.079 | C00233 | -2.22 | 4-Methyl-2-oxopentanoate; 2-Oxoisocaproate                                                                    |
| 111.091 | C00986 | -2.24 | 1,3-Diaminopropane; Trimethylenediamine; 1,3-Propanediamine; Propane-1,3-diamine                              |
| 111.978 | C05527 | -3.18 | 3-Sulfinylpyruvate; 3-Sulfino pyruvate                                                                        |
| 112.006 | C00022 | -2.05 | Pyruvate; Pyruvic acid; 2-Oxopropanoate; 2-Oxopropanoic acid; Pyrroacemic acid                                |
| 112.036 | C00099 | -2.04 | beta-Alanine; 3-Aminopropionic acid; 3-Aminopropanoate                                                        |
| 112.036 | C00213 | -2.88 | Sarcosine; N-Methylglycine                                                                                    |
| 112.036 | C00956 | -1.69 | L-2-Amino adipate; L-alpha-Amino adipate; L-alpha-Amino adipic acid; L-2-Amino adipic acid                    |
| 112.051 | C00956 | -3.07 | L-2-Amino adipate; L-alpha-Amino adipate; L-alpha-Amino adipic acid; L-2-Amino adipic acid                    |
| 112.051 | C05130 | -3.55 | Imidazole-4-acetaldehyde; Imidazole acetaldehyde                                                              |
| 112.086 | C00134 | -3.17 | Putrescine; 1,4-Butanediamine; 1,4-Diaminobutane; Tetramethylenediamine; Butane-1,4-diamine                   |
| 112.086 | C00388 | -3.74 | Histamine; 1H-Imidazole-4-ethanamine; 2-(4-Imidazolyl)ethylamine                                              |
| 112.99  | C00785 | -4.09 | Urocanate; Urocanic acid                                                                                      |
| 113.009 | C00022 | -2.87 | Pyruvate; Pyruvic acid; 2-Oxopropanoate; 2-Oxopropanoic acid; Pyrroacemic acid                                |
| 113.009 | C00222 | -1.72 | 3-Oxopropanoate; Malonate semialdehyde                                                                        |
| 113.034 | C00099 | -1.78 | beta-Alanine; 3-Aminopropionic acid; 3-Aminopropanoate                                                        |
| 113.034 | C00213 | -2.27 | Sarcosine; N-Methylglycine                                                                                    |
| 113.034 | C02055 | -1.66 | N-Acylglycine                                                                                                 |
| 113.038 | C00213 | -2.49 | Sarcosine; N-Methylglycine                                                                                    |
| 113.038 | C00213 | -2.66 | Sarcosine; N-Methylglycine                                                                                    |
| 113.059 | C05130 | -2.09 | Imidazole-4-acetaldehyde; Imidazole acetaldehyde                                                              |
| 114.031 | C00106 | -1.92 | Uracil                                                                                                        |
| 114.04  | C00099 | -2.25 | beta-Alanine; 3-Aminopropionic acid; 3-Aminopropanoate                                                        |
| 114.04  | C00213 | -2.35 | Sarcosine; N-Methylglycine                                                                                    |
| 114.066 | C00791 | -2.74 | Creatinine; 1-Methylglycocyanamide                                                                            |
| 114.954 | C00160 | -3.69 | Glycolate; Glycolic acid; Hydroxyacetic acid                                                                  |
| 114.968 | C00161 | -2.09 | 2-Oxo acid; 2-Oxocarboxylate; 2-Oxocarboxylic acid; 2-Oxo carboxylate                                         |
| 115.07  | C00791 | -3.43 | Creatinine; 1-Methylglycocyanamide                                                                            |
| 115.111 | C01888 | -2.25 | Aminoacetone; 1-Amino-2-propanone                                                                             |
| 115.957 | C00785 | -3.6  | Urocanate; Urocanic acid                                                                                      |
| 115.978 | C00160 | -3.02 | Glycolate; Glycolic acid; Hydroxyacetic acid                                                                  |
| 115.978 | C00160 | -3.05 | Glycolate; Glycolic acid; Hydroxyacetic acid                                                                  |
| 115.978 | C02929 | -4.34 | 2-Hydroxy carboxylate                                                                                         |
| 115.978 | C02929 | -4.51 | 2-Hydroxy carboxylate                                                                                         |
| 115.978 | C15565 | -2.33 | (S)-2-Hydroxy acid; (S)-2-Hydroxy acid; (S)-2-Hydroxyalkanoic acid; (S)-2-Hydroxycarboxylic acid              |
| 115.978 | C15565 | -2.35 | (S)-2-Hydroxy acid; (S)-2-Hydroxy acid; (S)-2-Hydroxyalkanoic acid; (S)-2-Hydroxycarboxylic acid              |
| 116.034 | C00152 | -2.94 | L-Asparagine; 2-Aminosuccinic acid                                                                            |
| 116.048 | C00429 | -2.03 | 5,6-Dihydrouracil; Dihydro-2,4(1H,3H)-pyrimidinedione; Dihydrouracile; Dihydrouracil                          |
| 116.048 | C02512 | -3.57 | 3-Cyano-L-alanine; L-3-Cyanoalanine; L-beta-Cyanoalanine                                                      |
| 116.96  | C00160 | -2.93 | Glycolate; Glycolic acid; Hydroxyacetic acid                                                                  |
| 116.975 | C00160 | -2.77 | Glycolate; Glycolic acid; Hydroxyacetic acid                                                                  |
| 116.975 | C02929 | -3.47 | 2-Hydroxy carboxylate                                                                                         |
| 116.975 | C15565 | -2.71 | (S)-2-Hydroxy acid; (S)-2-Hydroxy acid; (S)-2-Hydroxyalkanoic acid; (S)-2-Hydroxycarboxylic acid              |
| 116.994 | C00433 | -3.57 | 2,5-Dioxopentanoate; 2-Oxoglutarate semialdehyde                                                              |
| 117.021 | C00122 | -2.26 | Fumarate; Fumaric acid; trans-Butenedioic acid                                                                |
| 117.021 | C02119 | -1.76 | 3-Acylpyruvate                                                                                                |
| 117.954 | C00108 | -1.94 | Anthranilate; Anthranilic acid; o-Aminobenzoic acid; Vitamin L1; 2-Aminobenzoate                              |
| 118.064 | C00079 | -2.82 | L-Phenylalanine; (S)-alpha-Amino-beta-phenylpropionic acid                                                    |
| 118.064 | C00581 | -3.4  | Guanidinoacetate; Guanidinoacetic acid; Glycocyanine; N-Amidinoglycine; Guanidoacetic acid                    |
| 118.086 | C05335 | -2.32 | L-Selenomethionine                                                                                            |
| 118.947 | C00160 | -3.5  | Glycolate; Glycolic acid; Hydroxyacetic acid                                                                  |
| 118.971 | C05823 | -2.8  | 3-Mercaptolactate; L-3-Mercaptolactate; (R)-3-Mercaptolactate                                                 |
| 118.991 | C01563 | -2.89 | Carbamate; Carbamic acid; Aminoformic acid                                                                    |
| 119.017 | C00122 | -2.2  | Fumarate; Fumaric acid; trans-Butenedioic acid                                                                |
| 119.036 | C00042 | -1.9  | Succinate; Succinic acid; Butanedioic acid; Ethylenesuccinic acid                                             |
| 119.048 | C00166 | -4.49 | Phenylpyruvate; Phenylpyruvic acid; alpha-Ketohydrocinnamic acid; keto-Phenylpyruvate                         |
| 119.951 | C00160 | -4.47 | Glycolate; Glycolic acid; Hydroxyacetic acid                                                                  |
| 119.96  | C00168 | -2.21 | Hydroxypyruvate; Hydroxypyruvic acid; 3-Hydroxypyruvate; 3-Hydroxypyruvic acid                                |
| 119.975 | C00160 | -2.46 | Glycolate; Glycolic acid; Hydroxyacetic acid                                                                  |
| 119.987 | C01563 | -2.92 | Carbamate; Carbamic acid; Aminoformic acid                                                                    |
| 120.003 | C01879 | -2.58 | 5-Oxoproline; Pidoic acid; Pyroglutamic acid; 5-Pyrrolidone-2-carboxylic acid; Pyroglutamate; 5-Oxo-L-proline |
| 120.052 | C00300 | -2.17 | Creatine; alpha-Methylguanidino acetic acid; Methylglycocyanine                                               |
| 120.065 | C00188 | -3.31 | L-Threonine; 2-Amino-3-hydroxybutyric acid                                                                    |
| 120.065 | C00581 | -3.89 | Guanidinoacetate; Guanidinoacetic acid; Glycocyanine; N-Amidinoglycine; Guanidoacetic acid                    |
| 121.029 | C08276 | -3.03 | 3-(Methylthio)propanoate; 3-(Methylthio)propionic acid; 3-Methylthiopropionate; 3-(Methylsulfanyl)propanoate  |

|         |        |       |                                                                                                                  |
|---------|--------|-------|------------------------------------------------------------------------------------------------------------------|
| 121.039 | C00042 | -2.5  | Succinate; Succinic acid; Butanedionic acid; Ethylenesuccinic acid                                               |
| 121.966 | C04540 | -2.2  | N4-(Acetyl-beta-D-glucosaminy)l asparagine; N4-(beta-N-Acetyl-D-glucosaminy)l-L-asparagine                       |
| 121.985 | C01563 | -2.92 | Carbamate; Carbamic acid; Aminoformic acid                                                                       |
| 122.026 | C00097 | -1.83 | L-Cysteine; L-2-Amino-3-mercaptopropionic acid                                                                   |
| 122.096 | C00410 | -6.23 | Progesterone; 4-Pregnene-3,20-dione                                                                              |
| 123.016 | C00064 | -2.87 | L-Glutamine; L-2-Aminoglutaramic acid                                                                            |
| 123.016 | C05823 | -1.8  | 3-Mercaptolactate; L-3-Mercaptolactate; (R)-3-Mercaptolactate                                                    |
| 123.024 | C00097 | -1.7  | L-Cysteine; L-2-Amino-3-mercaptopropionic acid                                                                   |
| 123.024 | C08276 | -2.17 | 3-(Methylthio)propanoate; 3-(Methylthio)propionic acid; 3-Methylthiopropionate; 3-(Methylsulfanyl)propanoate     |
| 123.043 | C00166 | -3.99 | Phenylpyruvate; Phenylpyruvic acid; alpha-Ketohydrocinnamic acid; keto-Phenylpyruvate                            |
| 123.082 | C05341 | -1.84 | beta-Alanyl-L-lysine                                                                                             |
| 123.099 | C00410 | -5.73 | Progesterone; 4-Pregnene-3,20-dione                                                                              |
| 123.927 | C00155 | -2.23 | L-Homocysteine; L-2-Amino-4-mercaptobutyric acid; Homocysteine                                                   |
| 124.024 | C00097 | -1.88 | L-Cysteine; L-2-Amino-3-mercaptopropionic acid                                                                   |
| 124.024 | C05726 | -1.72 | S-Substituted L-cysteine; R-S-Cysteine; L-Cysteine S-conjugate                                                   |
| 124.024 | C15604 | -1.72 | Prenal                                                                                                           |
| 124.037 | C17234 | -1.89 | 2-Aminobut-2-enoate; (2Z)-2-Aminobut-2-enoic acid; 2-Ammoniobut-2-enoate                                         |
| 124.046 | C00378 | -2.06 | Thiamine; Thiamin; Vitamin B1; Aneurin; Antiberiberi factor                                                      |
| 124.974 | C00547 | -2.28 | L-Noradrenaline; Noradrenaline; Norepinephrine; Arterenol; 4-[(1R)-2-Amino-1-hydroxyethyl]-1,2-benzenediol       |
| 125.02  | C00232 | -2.02 | Succinate semialdehyde; Succinic semialdehyde; 4-Oxobutanoate                                                    |
| 125.02  | C00232 | -2.34 | Succinate semialdehyde; Succinic semialdehyde; 4-Oxobutanoate                                                    |
| 125.069 | C05827 | -3.08 | Methylimidazole acetaldehyde; 1-Methylimidazole-4-acetaldehyde; Methylimidazoleacetaldehyde                      |
| 125.986 | C01563 | -2.8  | Carbamate; Carbamic acid; Aminoformic acid                                                                       |
| 126.036 | C00555 | -3.26 | 4-Aminobutyraldehyde; 4-Aminobutanal                                                                             |
| 126.053 | C00334 | -2.34 | 4-Aminobutanoate; 4-Aminobutanoic acid; 4-Aminobutyrate; 4-Aminobutyric acid; gamma-Aminobutyric acid            |
| 126.053 | C02356 | -2.63 | (S)-2-Aminobutanoate; (S)-2-Aminobutanoic acid; (S)-2-Aminobutyric acid                                          |
| 126.921 | C00547 | -1.74 | L-Noradrenaline; Noradrenaline; Norepinephrine; Arterenol; 4-[(1R)-2-Amino-1-hydroxyethyl]-1,2-benzenediol       |
| 126.968 | C05823 | -2.66 | 3-Mercaptolactate; L-3-Mercaptolactate; (R)-3-Mercaptolactate                                                    |
| 126.989 | C01563 | -3.14 | Carbamate; Carbamic acid; Aminoformic acid                                                                       |
| 127.023 | C00109 | -3.2  | 2-Oxobutanoate; 2-Ketobutyric acid; 2-Oxobutyric acid; 2-Oxobutyrate; 2-Oxobutanoic acid; alpha-Ketobutyric acid |
| 127.023 | C00232 | -3.97 | Succinate semialdehyde; Succinic semialdehyde; 4-Oxobutanoate                                                    |
| 127.023 | C15604 | -3.16 | Prenal                                                                                                           |
| 127.072 | C05827 | -5.26 | Methylimidazole acetaldehyde; 1-Methylimidazole-4-acetaldehyde; Methylimidazoleacetaldehyde                      |
| 127.121 | C00881 | -2.48 | Deoxycytidine; 2'-Deoxycytidine                                                                                  |
| 128.019 | C00258 | -2.31 | D-Glycerate; Glycerate; (R)-Glycerate; Glyceric acid                                                             |
| 128.068 | C05130 | -3.63 | Imidazole-4-acetaldehyde; Imidazole acetaldehyde                                                                 |
| 128.104 | C00956 | -2.83 | L-2-Amino adipate; L-alpha-Amino adipate; L-alpha-Amino adipic acid; L-2-Amino adipic acid                       |
| 128.95  | C04540 | -2.83 | N4-(Acetyl-beta-D-glucosaminy)l asparagine; N4-(beta-N-Acetyl-D-glucosaminy)l-L-asparagine                       |
| 128.962 | C05823 | -2.63 | 3-Mercaptolactate; L-3-Mercaptolactate; (R)-3-Mercaptolactate                                                    |
| 128.985 | C00086 | -4.36 | Urea; Carbamide                                                                                                  |
| 129.02  | C00258 | -2.51 | D-Glycerate; Glycerate; (R)-Glycerate; Glyceric acid                                                             |
| 129.088 | C05130 | -3.29 | Imidazole-4-acetaldehyde; Imidazole acetaldehyde                                                                 |
| 130.016 | C00258 | -2.84 | D-Glycerate; Glycerate; (R)-Glycerate; Glyceric acid                                                             |
| 130.049 | C01879 | -1.69 | 5-Oxoproline; Pidolic acid; Pyroglutamic acid; 5-Pyrrolidone-2-carboxylic acid; Pyroglutamate; 5-Oxo-L-proline   |
| 130.049 | C01879 | -1.71 | 5-Oxoproline; Pidolic acid; Pyroglutamic acid; 5-Pyrrolidone-2-carboxylic acid; Pyroglutamate; 5-Oxo-L-proline   |
| 130.085 | C00062 | -2.68 | L-Arginine; (S)-2-Amino-5-guanidinovaleric acid; L-Arg                                                           |
| 130.085 | C05936 | -3.66 | N4-Acetylaminobutanal; 4-Acetamidobutanal                                                                        |
| 131.019 | C00258 | -2.6  | D-Glycerate; Glycerate; (R)-Glycerate; Glyceric acid                                                             |
| 131.051 | C00064 | -1.71 | L-Glutamine; L-2-Aminoglutaramic acid                                                                            |
| 131.068 | C00956 | -1.83 | L-2-Amino adipate; L-alpha-Amino adipate; L-alpha-Amino adipic acid; L-2-Amino adipic acid; L-2-                 |
| 131.085 | C05936 | -3.15 | N4-Acetylaminobutanal; 4-Acetamidobutanal                                                                        |
| 131.085 | C05936 | -3.22 | N4-Acetylaminobutanal; 4-Acetamidobutanal                                                                        |
| 131.962 | C00160 | -1.87 | Glycolate; Glycolic acid; Hydroxyacetic acid                                                                     |
| 131.973 | C00988 | -4.35 | 2-Phosphoglycolate; Phosphoglycolic acid                                                                         |
| 132.076 | C05842 | -1.73 | N1-Methyl-2-pyridone-5-carboxamide; N'-Methyl-2-pyridone-5-carboxamide; 1-Methyl-5-carboxylamide-2-pyridone      |
| 132.101 | C00123 | -2.01 | L-Leucine; 2-Amino-4-methylvaleric acid; (2S)-alpha-2-Amino-4-methylvaleric acid; (2S)-alpha-Leucine             |
| 132.972 | C01353 | -3.45 | Carbonic acid; Dihydrogen carbonate; H2CO3                                                                       |
| 133.016 | C00036 | -2.1  | Oxaloacetate; Oxalacetic acid; Oxaloacetic acid; 2-Oxobutanedioic acid; 2-Oxosuccinic acid; keto-Oxaloacetate    |
| 133.032 | C00134 | -2.05 | Putrescine; 1,4-Butanediamine; 1,4-Diaminobutane; Tetramethylenediamine; Butane-1,4-diamine                      |
| 133.06  | C00152 | -4.62 | L-Asparagine; 2-Aminosuccinamic acid                                                                             |
| 133.06  | C02642 | -3.02 | 3-Ureidopropionate; 3-Ureidopropanoate; beta-Ureidopropionic acid; N-Carbamoyl-beta-alanine                      |
| 133.085 | C06425 | -2.07 | Icosanoic acid; Eicosanoic acid; Arachidic acid                                                                  |
| 133.968 | C03508 | -3.16 | L-2-Amino-3-oxobutanoic acid; L-2-Amino-3-oxobutanoate; L-2-Amino-acetoacetate; (S)-2-Amino-3-oxobutanoic acid   |
| 134.044 | C04377 | -1.68 | 5,10-Methylenetetrahydromethanopterin; N5,N10-Methylenetetrahydromethanopterin                                   |
| 134.063 | C02642 | -3.57 | 3-Ureidopropionate; 3-Ureidopropanoate; beta-Ureidopropionic acid; N-Carbamoyl-beta-alanine                      |
| 134.067 | C02642 | -1.94 | 3-Ureidopropionate; 3-Ureidopropanoate; beta-Ureidopropionic acid; N-Carbamoyl-beta-alanine                      |
| 134.067 | C05130 | -2.12 | Imidazole-4-acetaldehyde; Imidazole acetaldehyde                                                                 |
| 134.089 | C06425 | -2.08 | Icosanoic acid; Eicosanoic acid; Arachidic acid                                                                  |
| 135.002 | C00117 | -2.62 | D-Ribose 5-phosphate; Ribose 5-phosphate                                                                         |
| 135.049 | C00049 | -2.33 | L-Aspartate; L-Aspartic acid; 2-Aminosuccinic acid; L-Asp                                                        |
| 135.049 | C00402 | -2.57 | D-Aspartate; D-Aspartic acid                                                                                     |
| 135.08  | C00535 | -5.68 | Testosterone; 17beta-Hydroxy-4-androsten-3-one                                                                   |
| 135.965 | C00433 | -2.26 | 2,5-Dioxopentanoate; 2-Oxoglutarate semialdehyde                                                                 |
| 135.977 | C00062 | -3    | L-Arginine; (S)-2-Amino-5-guanidinovaleric acid; L-Arg                                                           |
| 136.002 | C00149 | -2.54 | (S)-Malate; L-Malate; L-Apple acid; L-Malic acid; L-2-Hydroxybutanedioic acid; Malate; Malic acid                |
| 136.047 | C00049 | -1.98 | L-Aspartate; L-Aspartic acid; 2-Aminosuccinic acid; L-Asp                                                        |
| 136.047 | C00155 | -2.98 | L-Homocysteine; L-2-Amino-4-mercaptobutyric acid; Homocysteine                                                   |
| 136.047 | C00791 | -3.1  | Creatinine; 1-Methylglycocyanamide                                                                               |
| 136.075 | C00166 | -3.5  | Phenylpyruvate; Phenylpyruvic acid; alpha-Ketohydrocinnamic acid; keto-Phenylpyruvate                            |
| 137.002 | C00433 | -2.1  | 2,5-Dioxopentanoate; 2-Oxoglutarate semialdehyde                                                                 |
| 137.048 | C00155 | -1.78 | L-Homocysteine; L-2-Amino-4-mercaptobutyric acid; Homocysteine                                                   |
| 137.048 | C00791 | -2.24 | Creatinine; 1-Methylglycocyanamide                                                                               |
| 137.048 | C00791 | -2.31 | Creatinine; 1-Methylglycocyanamide                                                                               |



|         |        |       |                                                                                                                  |
|---------|--------|-------|------------------------------------------------------------------------------------------------------------------|
| 137.076 | C00931 | -2.2  | Porphobilinogen                                                                                                  |
| 137.106 | C03406 | -2.9  | N-(L-Arginino)succinate; 2-(Nomega-L-Arginino)succinate; L-Argininosuccinate; L-Argininosuccinic acid            |
| 137.997 | C01563 | -3.38 | Carbamate; Carbamic acid; Aminoformic acid                                                                       |
| 138.015 | C00064 | -2.6  | L-Glutamine; L-2-Aminoglutaramic acid                                                                            |
| 138.054 | C00148 | -3.43 | L-Proline; 2-Pyrrolidinecarboxylic acid                                                                          |
| 138.054 | C00791 | -3.36 | Creatinine; 1-Methylglyocyamidine                                                                                |
| 138.998 | C00122 | -4.16 | Fumarate; Fumaric acid; trans-Butenedioic acid                                                                   |
| 138.998 | C02119 | -2.43 | 3-Acylpyruvate                                                                                                   |
| 139.05  | C00148 | -2.68 | L-Proline; 2-Pyrrolidinecarboxylic acid                                                                          |
| 139.05  | C00785 | -2.32 | Urocanate; Urocanic acid                                                                                         |
| 139.073 | C00379 | -1.77 | Xylitol                                                                                                          |
| 139.962 | C04540 | -1.79 | N4-(Acetyl-beta-D-glucosaminy)l-asparagine; N4-(beta-N-Acetyl-D-glucosaminy)l-L-asparagine                       |
| 140.001 | C00122 | -1.92 | Fumarate; Fumaric acid; trans-Butenedioic acid                                                                   |
| 140.032 | C03508 | -2.91 | L-2-Amino-3-oxobutanoic acid; L-2-Amino-3-oxobutanoate; L-2-Amino-acetoacetate; (S)-2-Amino-3-oxobutanoic acid   |
| 140.067 | C05335 | -2.55 | L-Selenomethionine                                                                                               |
| 140.067 | C05828 | -3.55 | Methylimidazoleacetic acid; Tele-methylimidazoleacetic acid; 1-Methyl-4-imidazoleacetic acid                     |
| 140.104 | C00410 | -7.33 | Progesterone; 4-Pregnene-3,20-dione                                                                              |
| 140.903 | C00031 | -2.86 | D-Glucose; Grape sugar; Dextrose; Glucose; D-Glucopyranose                                                       |
| 140.959 | C04540 | -1.78 | N4-(Acetyl-beta-D-glucosaminy)l-asparagine; N4-(beta-N-Acetyl-D-glucosaminy)l-L-asparagine                       |
| 140.983 | C04540 | -2.31 | N4-(Acetyl-beta-D-glucosaminy)l-asparagine; N4-(beta-N-Acetyl-D-glucosaminy)l-L-asparagine                       |
| 141.005 | C00122 | -2    | Fumarate; Fumaric acid; trans-Butenedioic acid                                                                   |
| 141.005 | C02119 | -1.97 | 3-Acylpyruvate                                                                                                   |
| 141.005 | C17234 | -4.51 | 2-Aminobut-2-enoate; (2Z)-2-Aminobut-2-enoic acid; 2-Ammoniobut-2-enoate                                         |
| 141.054 | C00785 | -3.43 | Urocanate; Urocanic acid                                                                                         |
| 141.070 | C05335 | -2.12 | L-Selenomethionine                                                                                               |
| 141.070 | C05335 | -2.14 | L-Selenomethionine                                                                                               |
| 141.070 | C05828 | -2.56 | Methylimidazoleacetic acid; Tele-methylimidazoleacetic acid; 1-Methyl-4-imidazoleacetic acid                     |
| 141.138 | C00642 | -2.43 | 4-Hydroxyphenylacetate; 4-Hydroxyphenylacetic acid                                                               |
| 141.958 | C00160 | -2.16 | Glycolate; Glycolic acid; Hydroxyacetic acid                                                                     |
| 141.983 | C00988 | -2.2  | 2-Phosphoglycolate; Phosphoglycolic acid                                                                         |
| 142.008 | C02305 | -4.53 | Phosphocreatine; N-Phosphocreatine; Creatine phosphate                                                           |
| 142.008 | C17234 | -4.22 | 2-Aminobut-2-enoate; (2Z)-2-Aminobut-2-enoic acid; 2-Ammoniobut-2-enoate                                         |
| 142.034 | C03508 | -2.38 | L-2-Amino-3-oxobutanoic acid; L-2-Amino-3-oxobutanoate; L-2-Amino-acetoacetate; (S)-2-Amino-3-oxobutanoic acid   |
| 142.048 | C00295 | -1.77 | Orotate; Orotic acid; Uracil-6-carboxylic acid                                                                   |
| 142.097 | C00921 | -3    | Dihydropteroate; 7,8-Dihydropteroate                                                                             |
| 142.900 | C00031 | -2.72 | D-Glucose; Grape sugar; Dextrose; Glucose; D-Glucopyranose                                                       |
| 142.962 | C00160 | -3.75 | Glycolate; Glycolic acid; Hydroxyacetic acid                                                                     |
| 142.976 | C00168 | -2.84 | Hydroxypyruvate; Hydroxypyruvic acid; 3-Hydroxypyruvate; 3-Hydroxypyruvic acid                                   |
| 142.976 | C00957 | -2.16 | Mercaptopyruvate; 3-Mercaptopyruvic acid; 3-Mercaptopyruvate                                                     |
| 142.976 | C01146 | -2.7  | 2-Hydroxy-3-oxopropanoate; Tartronate semialdehyde                                                               |
| 143.001 | C01353 | -2.5  | Carbonic acid; Dihydrogen carbonate; H2CO3                                                                       |
| 143.001 | C17234 | -2.22 | 2-Aminobut-2-enoate; (2Z)-2-Aminobut-2-enoic acid; 2-Ammoniobut-2-enoate                                         |
| 143.053 | C00188 | -1.86 | L-Threonine; 2-Amino-3-hydroxybutyric acid                                                                       |
| 143.053 | C03824 | -3.39 | 2-Aminomuconate semialdehyde; 2-Aminomuconate 6-semialdehyde                                                     |
| 143.068 | C00134 | -2.58 | Putrescine; 1,4-Butanediamine; 1,4-Diaminobutane; Tetramethylenediamine; Butane-1,4-diamine                      |
| 143.068 | C05828 | -2.15 | Methylimidazoleacetic acid; Tele-methylimidazoleacetic acid; 1-Methyl-4-imidazoleacetic acid                     |
| 143.996 | C01563 | -3    | Carbamate; Carbamic acid; Aminoformic acid                                                                       |
| 144.048 | C00188 | -3.05 | L-Threonine; 2-Amino-3-hydroxybutyric acid                                                                       |
| 144.063 | C00188 | -2.98 | L-Threonine; 2-Amino-3-hydroxybutyric acid                                                                       |
| 144.943 | C00320 | -2.39 | Thiosulfate; Hyposulfite                                                                                         |
| 144.981 | C03508 | -2.58 | L-2-Amino-3-oxobutanoic acid; L-2-Amino-3-oxobutanoate; L-2-Amino-acetoacetate; (S)-2-Amino-3-oxobutanoic acid   |
| 144.992 | C00258 | -2.34 | D-Glycerate; Glycerate; (R)-Glycerate; Glyceric acid                                                             |
| 144.992 | C05823 | -2.62 | 3-Mercaptolactate; L-3-Mercaptolactate; (R)-3-Mercaptolactate                                                    |
| 145.034 | C00109 | -3.04 | 2-Oxobutanoate; 2-Ketobutyric acid; 2-Oxobutyric acid; 2-Oxobutyrate; 2-Oxobutanoic acid; alpha-Ketobutyric acid |
| 146.030 | C00026 | -3.29 | 2-Oxoglutarate; Oxoglutaric acid; 2-Ketoglutaric acid; alpha-Ketoglutaric acid                                   |
| 146.059 | C00581 | -2.99 | Guanidinoacetate; Guanidinoacetic acid; Glycocyamine; N-Amidinoglycine; Guanidoacetic acid                       |
| 146.080 | C02946 | -3.06 | 4-Acetamidobutanoate; N4-Acetylamino-butanoate                                                                   |
| 146.080 | C04076 | -3.16 | L-2-Amino adipate 6-semialdehyde; 2-Amino adipate 6-semialdehyde; L-Allysine; Allysine                           |
| 146.090 | C01035 | -4.86 | 4-Guanidinobutanoate; 4-Guanidinobutyric acid                                                                    |
| 146.996 | C00086 | -2.94 | Urea; Carbamide                                                                                                  |
| 147.031 | C00026 | -3.82 | 2-Oxoglutarate; Oxoglutaric acid; 2-Ketoglutaric acid; alpha-Ketoglutaric acid                                   |
| 147.075 | C04076 | -2.23 | L-2-Amino adipate 6-semialdehyde; 2-Amino adipate 6-semialdehyde; L-Allysine; Allysine                           |
| 147.952 | C00160 | -2.51 | Glycolate; Glycolic acid; Hydroxyacetic acid                                                                     |
| 147.989 | C01563 | -3.97 | Carbamate; Carbamic acid; Aminoformic acid                                                                       |
| 148.027 | C00258 | -2.57 | D-Glycerate; Glycerate; (R)-Glycerate; Glyceric acid                                                             |
| 148.058 | C00025 | -3    | L-Glutamate; L-Glutamic acid; L-Glutaminic acid; Glutamate                                                       |
| 148.058 | C00302 | -2.86 | Glutamate; Glutaminic acid; 2-Aminoglutaric acid                                                                 |
| 148.078 | C00064 | -2.21 | L-Glutamine; L-2-Aminoglutaramic acid                                                                            |
| 148.078 | C00064 | -2.28 | L-Glutamine; L-2-Aminoglutaramic acid                                                                            |
| 148.096 | C00152 | -2.49 | L-Asparagine; 2-Aminosuccinamic acid                                                                             |
| 148.096 | C01035 | -2.67 | 4-Guanidinobutanoate; 4-Guanidinobutyric acid                                                                    |
| 148.111 | C00047 | -2.72 | L-Lysine; Lysine acid; 2,6-Diaminohexanoic acid                                                                  |
| 148.935 | C00279 | -2.21 | D-Erythrose 4-phosphate                                                                                          |
| 149.077 | C00064 | -2.19 | L-Glutamine; L-2-Aminoglutaramic acid                                                                            |
| 150.027 | C00612 | -1.77 | N1-Acetylspermidine                                                                                              |
| 150.058 | C00073 | -2.23 | L-Methionine; Methionine; L-2-Amino-4methylthiobutyric acid                                                      |
| 150.058 | C05578 | -2.73 | 5,6-Dihydroxyindole; DHI                                                                                         |
| 150.931 | C00197 | -2.38 | 3-Phospho-D-glycerate; D-Glycerate 3-phosphate; 3-Phospho-(R)-glycerate; 3-Phosphoglycerate                      |
| 151.035 | C00258 | -2.7  | D-Glycerate; Glycerate; (R)-Glycerate; Glyceric acid                                                             |
| 151.982 | C02305 | -2.69 | Phosphocreatine; N-Phosphocreatine; Creatine phosphate                                                           |
| 152.081 | C00152 | -4.36 | L-Asparagine; 2-Aminosuccinamic acid                                                                             |
| 152.106 | C00233 | -1.87 | 4-Methyl-2-oxopentanoate; 2-Oxoisocaproate                                                                       |
| 152.144 | C01051 | -2.1  | Uroporphyrinogen III                                                                                             |

|         |        |       |                                                                                                                  |
|---------|--------|-------|------------------------------------------------------------------------------------------------------------------|
| 153.016 | C00433 | -1.78 | 2,5-Dioxopentanoate; 2-Oxoglutarate semialdehyde                                                                 |
| 153.016 | C00791 | -2.04 | Creatinine; 1-Methylglycocyanamide                                                                               |
| 153.032 | C00022 | -2.6  | Pyruvate; Pyruvic acid; 2-Oxopropanoate; 2-Oxopropanoic acid; Pyroracemic acid                                   |
| 153.032 | C01879 | -3.35 | 5-Oxoproline; Pidolic acid; Pyroglutamic acid; 5-Pyrrolidone-2-carboxylic acid; Pyroglutamate; 5-Oxo-L-proline   |
| 153.032 | C01879 | -3.4  | 5-Oxoproline; Pidolic acid; Pyroglutamic acid; 5-Pyrrolidone-2-carboxylic acid; Pyroglutamate; 5-Oxo-L-proline   |
| 153.032 | C04281 | -3.22 | L-1-Pyrroline-3-hydroxy-5-carboxylate; 3-Hydroxy-L-1-pyrroline-5-carboxylate                                     |
| 153.032 | C04281 | -3.42 | L-1-Pyrroline-3-hydroxy-5-carboxylate; 3-Hydroxy-L-1-pyrroline-5-carboxylate                                     |
| 153.050 | C00233 | -1.72 | 4-Methyl-2-oxopentanoate; 2-Oxoisocaproate                                                                       |
| 153.050 | C04043 | -2.06 | 3,4-Dihydroxyphenylacetaldehyde; Protocatechuatealdehyde                                                         |
| 153.099 | C02714 | -3.04 | N-Acetylputrescine                                                                                               |
| 154.033 | C01879 | -3.96 | 5-Oxoproline; Pidolic acid; Pyroglutamic acid; 5-Pyrrolidone-2-carboxylic acid; Pyroglutamate; 5-Oxo-L-proline   |
| 154.033 | C04281 | -2.67 | L-1-Pyrroline-3-hydroxy-5-carboxylate; 3-Hydroxy-L-1-pyrroline-5-carboxylate                                     |
| 154.058 | C00300 | -2.24 | Creatine; alpha-Methylguanidino acetic acid; Methylglycocyanamine                                                |
| 154.058 | C00300 | -2.26 | Creatine; alpha-Methylguanidino acetic acid; Methylglycocyanamine                                                |
| 154.058 | C05842 | -2.21 | N1-Methyl-2-pyridone-5-carboxamide; N'-Methyl-2-pyridone-5-carboxamide; 1-Methyl-5-carboxylamide-2-pyridone      |
| 154.058 | C05843 | -2.33 | N1-Methyl-4-pyridone-5-carboxamide; N'-Methyl-4-pyridone-5-carboxamide; 1-Methyl-4-pyridone-3-carboximide        |
| 154.083 | C03758 | -1.96 | Dopamine; 4-(2-Aminoethyl)-1,2-benzenediol; 4-(2-Aminoethyl)benzene-1,2-diol; 3,4-Dihydroxyphenethylamine        |
| 155.013 | C00433 | -2.45 | 2,5-Dioxopentanoate; 2-Oxoglutarate semialdehyde                                                                 |
| 155.013 | C00606 | -2.29 | 3-Sulfinio-L-alanine; L-Cysteinesulfinic acid; 3-Sulphino-L-alanine; 3-Sulfinioalanine                           |
| 155.013 | C00791 | -2.58 | Creatinine; 1-Methylglycocyanamide                                                                               |
| 155.027 | C00791 | -4.05 | Creatinine; 1-Methylglycocyanamide                                                                               |
| 155.042 | C00152 | -2.8  | L-Asparagine; 2-Aminosuccinamic acid                                                                             |
| 155.053 | C00152 | -1.84 | L-Asparagine; 2-Aminosuccinamic acid                                                                             |
| 155.053 | C00300 | -2.43 | Creatine; alpha-Methylguanidino acetic acid; Methylglycocyanamine                                                |
| 155.066 | C00300 | -1.67 | Creatine; alpha-Methylguanidino acetic acid; Methylglycocyanamine                                                |
| 155.08  | C00077 | -2.74 | L-Ornithine; (S)-2,5-Diaminovaleric acid; (S)-2,5-Diaminopentanoic acid; (S)-2,5-Diaminopentanoate               |
| 155.099 | C06425 | -2.3  | Icosanoic acid; Eicosanoic acid; Arachidic acid                                                                  |
| 155.978 | C02119 | -1.89 | 3-Acylpyruvate                                                                                                   |
| 156.001 | C00433 | -2.44 | 2,5-Dioxopentanoate; 2-Oxoglutarate semialdehyde                                                                 |
| 156.001 | C03508 | -3.07 | L-2-Amino-3-oxobutanoic acid; L-2-Amino-3-oxobutanoate; L-2-Amino-acetoacetate; (S)-2-Amino-3-oxobutanoic acid   |
| 156.076 | C00077 | -2.32 | L-Ornithine; (S)-2,5-Diaminovaleric acid; (S)-2,5-Diaminopentanoic acid; (S)-2,5-Diaminopentanoate               |
| 156.076 | C00135 | -3.01 | L-Histidine; (S)-alpha-Amino-1H-imidazole-4-propionic acid                                                       |
| 157.014 | C00149 | -2.34 | (S)-Malate; L-Malate; L-Apple acid; L-Malic acid; L-2-Hydroxybutanedioic acid; Malate; Malic acid                |
| 157.014 | C00581 | -3.02 | Guanidinoacetate; Guanidinoacetic acid; Glycocyanamine; N-Amidinoglycine; Guanidoacetic acid                     |
| 157.014 | C00581 | -3.33 | Guanidinoacetate; Guanidinoacetic acid; Glycocyanamine; N-Amidinoglycine; Guanidoacetic acid                     |
| 157.014 | C03508 | -2.96 | L-2-Amino-3-oxobutanoic acid; L-2-Amino-3-oxobutanoate; L-2-Amino-acetoacetate; (S)-2-Amino-3-oxobutanoic acid   |
| 157.027 | C00295 | -2.72 | Orotate; Orotic acid; Uracil-6-carboxylic acid                                                                   |
| 157.083 | C00077 | -2.19 | L-Ornithine; (S)-2,5-Diaminovaleric acid; (S)-2,5-Diaminopentanoic acid; (S)-2,5-Diaminopentanoate               |
| 157.083 | C00135 | -2.16 | L-Histidine; (S)-alpha-Amino-1H-imidazole-4-propionic acid                                                       |
| 157.120 | C00931 | -2.42 | Porphobilinogen                                                                                                  |
| 158.021 | C00155 | -3.85 | L-Homocysteine; L-2-Amino-4-mercaptobutyric acid; Homocysteine                                                   |
| 158.021 | C00188 | -4.05 | L-Threonine; 2-Amino-3-hydroxybutyric acid                                                                       |
| 158.021 | C00295 | -2.16 | Orotate; Orotic acid; Uracil-6-carboxylic acid                                                                   |
| 158.021 | C00581 | -3.85 | Guanidinoacetate; Guanidinoacetic acid; Glycocyanamine; N-Amidinoglycine; Guanidoacetic acid                     |
| 158.021 | C00581 | -4.03 | Guanidinoacetate; Guanidinoacetic acid; Glycocyanamine; N-Amidinoglycine; Guanidoacetic acid                     |
| 158.093 | C00062 | -2.13 | L-Arginine; (S)-2-Amino-5-guanidinovaleric acid; L-Arg                                                           |
| 158.996 | C00168 | -2.7  | Hydroxypyruvate; Hydroxypyruvic acid; 3-Hydroxypyruvate; 3-Hydroxypyruvic acid                                   |
| 158.996 | C03508 | -3.49 | L-2-Amino-3-oxobutanoic acid; L-2-Amino-3-oxobutanoate; L-2-Amino-acetoacetate; (S)-2-Amino-3-oxobutanoic acid   |
| 159.014 | C00149 | -2.42 | (S)-Malate; L-Malate; L-Apple acid; L-Malic acid; L-2-Hydroxybutanedioic acid; Malate; Malic acid                |
| 159.014 | C00188 | -3.9  | L-Threonine; 2-Amino-3-hydroxybutyric acid                                                                       |
| 159.048 | C00134 | -2.53 | Putrescine; 1,4-Butanediamine; 1,4-Diaminobutane; Tetramethylenediamine; Butane-1,4-diamine                      |
| 159.048 | C00183 | -1.9  | L-Valine; 2-Amino-3-methylbutyric acid                                                                           |
| 159.048 | C00183 | -1.91 | L-Valine; 2-Amino-3-methylbutyric acid                                                                           |
| 159.048 | C05335 | -2.26 | L-Selenomethionine                                                                                               |
| 159.048 | C05335 | -2.33 | L-Selenomethionine                                                                                               |
| 159.075 | C00064 | -3.55 | L-Glutamine; L-2-Aminoglutaramic acid                                                                            |
| 160.017 | C00155 | -3.3  | L-Homocysteine; L-2-Amino-4-mercaptobutyric acid; Homocysteine                                                   |
| 160.017 | C00188 | -2.87 | L-Threonine; 2-Amino-3-hydroxybutyric acid                                                                       |
| 160.060 | C00049 | -2.03 | L-Aspartate; L-Aspartic acid; 2-Aminosuccinic acid; L-Asp                                                        |
| 160.969 | C05823 | -3.08 | 3-Mercaptolactate; L-3-Mercaptolactate; (R)-3-Mercaptolactate                                                    |
| 160.991 | C00108 | -1.92 | Anthranilate; Anthranilic acid; o-Aminobenzoic acid; Vitamin L1; 2-Aminobenzoate                                 |
| 161.012 | C00188 | -2.44 | L-Threonine; 2-Amino-3-hydroxybutyric acid                                                                       |
| 161.012 | C01353 | -1.96 | Carbonic acid; Dihydrogen carbonate; H2CO3                                                                       |
| 161.969 | C00169 | -3.84 | Carbamoyl phosphate                                                                                              |
| 161.969 | C05823 | -3.27 | 3-Mercaptolactate; L-3-Mercaptolactate; (R)-3-Mercaptolactate                                                    |
| 161.969 | C05823 | -3.28 | 3-Mercaptolactate; L-3-Mercaptolactate; (R)-3-Mercaptolactate                                                    |
| 162.007 | C00258 | -2.64 | D-Glycerate; Glycerate; (R)-Glycerate; Glyceric acid                                                             |
| 162.073 | C05130 | -2.68 | Imidazole-4-acetaldehyde; Imidazole acetaldehyde                                                                 |
| 163.002 | C00258 | -2.19 | D-Glycerate; Glycerate; (R)-Glycerate; Glyceric acid                                                             |
| 163.044 | C05828 | -3.9  | Methylimidazoleacetic acid; Tele-methylimidazoleacetic acid; 1-Methyl-4-imidazoleacetic acid                     |
| 163.044 | C15606 | -1.7  | 1,2-Dihydroxy-5-(methylthio)pent-1-en-3-one; 1,2-Dihydroxy-5-(methylsulfanyl)pent-1-en-3-one                     |
| 163.073 | C01035 | -1.76 | 4-Guanidinobutanoate; 4-Guanidinobutyric acid                                                                    |
| 163.115 | C00109 | -3.42 | 2-Oxobutanoate; 2-Ketobutyric acid; 2-Oxobutyric acid; 2-Oxobutyrate; 2-Oxobutanoic acid; alpha-Ketobutyric acid |
| 163.967 | C00169 | -3.33 | Carbamoyl phosphate                                                                                              |
| 163.967 | C05823 | -2.36 | 3-Mercaptolactate; L-3-Mercaptolactate; (R)-3-Mercaptolactate                                                    |
| 163.967 | C05823 | -2.44 | 3-Mercaptolactate; L-3-Mercaptolactate; (R)-3-Mercaptolactate                                                    |
| 164.029 | C00295 | -3.43 | Orotate; Orotic acid; Uracil-6-carboxylic acid                                                                   |
| 164.029 | C05827 | -2.41 | Methylimidazole acetaldehyde; 1-Methylimidazole-4-acetaldehyde; Methylimidazoleacetaldehyde                      |
| 164.029 | C05827 | -2.56 | Methylimidazole acetaldehyde; 1-Methylimidazole-4-acetaldehyde; Methylimidazoleacetaldehyde                      |
| 164.046 | C05828 | -4.25 | Methylimidazoleacetic acid; Tele-methylimidazoleacetic acid; 1-Methyl-4-imidazoleacetic acid                     |
| 164.046 | C15606 | -1.69 | 1,2-Dihydroxy-5-(methylthio)pent-1-en-3-one; 1,2-Dihydroxy-5-(methylsulfanyl)pent-1-en-3-one                     |
| 165.011 | C00279 | -3.13 | D-Erythrose 4-phosphate                                                                                          |
| 165.053 | C00166 | -3.18 | Phenylpyruvate; Phenylpyruvic acid; alpha-Ketohydrocinnamic acid; keto-Phenylpyruvate                            |

|         |        |       |                                                                                                                |
|---------|--------|-------|----------------------------------------------------------------------------------------------------------------|
| 165.053 | C02763 | -3.38 | 2-Hydroxy-3-phenylpropenoate; enol-Phenylpyruvate; enol-Phenylpyruvic acid; enol-alpha-Ketohydrocinnamic acid  |
| 165.111 | C00956 | -2.12 | L-2-Amino adipate; L-alpha-Amino adipate; L-alpha-Amino adipic acid; L-2-Amino adipic acid                     |
| 165.962 | C04540 | -1.9  | N4-(Acetyl-beta-D-glucosaminy) asparagine; N4-(beta-N-Acetyl-D-glucosaminy)-L-asparagine                       |
| 165.965 | C00049 | -2.46 | L-Aspartate; L-Aspartic acid; 2-Aminosuccinic acid; L-Asp                                                      |
| 166.993 | C05828 | -2.03 | Methylimidazoleacetic acid; Tele-methylimidazoleacetic acid; 1-Methyl-4-imidazoleacetic acid                   |
| 167.012 | C01563 | -2.31 | Carbamate; Carbamic acid; Aminoformic acid                                                                     |
| 167.012 | C02835 | -2.04 | Imidazole-4-acetate; Imidazoleacetic acid; 4-Imidazoleacetate                                                  |
| 167.051 | C15999 | -2.01 | L-Methionine (S)-S-oxide                                                                                       |
| 167.066 | C05576 | -2.6  | 3,4-Dihydroxyphenylethyleneglycol                                                                              |
| 168.05  | C00025 | -4.08 | L-Glutamate; L-Glutamic acid; L-Glutaminic acid; Glutamate                                                     |
| 168.05  | C15999 | -4.22 | L-Methionine (S)-S-oxide                                                                                       |
| 168.992 | C00074 | -1.98 | Phosphoenolpyruvate; Phosphoenolpyruvic acid; PEP                                                              |
| 168.992 | C00433 | -1.77 | 2,5-Dioxopentanoate; 2-Oxoglutarate semialdehyde                                                               |
| 169.015 | C00026 | -3.33 | 2-Oxoglutarate; Oxoglutaric acid; 2-Ketoglutaric acid; alpha-Ketoglutaric acid                                 |
| 169.147 | C00315 | -1.75 | Spermidine; N-(3-Aminopropyl)-1,4-butane-diamine                                                               |
| 169.147 | C00315 | -1.76 | Spermidine; N-(3-Aminopropyl)-1,4-butane-diamine                                                               |
| 169.998 | C00433 | -1.69 | 2,5-Dioxopentanoate; 2-Oxoglutarate semialdehyde                                                               |
| 170.012 | C00026 | -2.56 | 2-Oxoglutarate; Oxoglutaric acid; 2-Ketoglutaric acid; alpha-Ketoglutaric acid                                 |
| 170.033 | C00300 | -2.08 | Creatine; alpha-Methylguanidino acetic acid; Methylglycocyanine                                                |
| 170.047 | C00025 | -3.61 | L-Glutamate; L-Glutamic acid; L-Glutaminic acid; Glutamate                                                     |
| 170.047 | C00302 | -3.61 | Glutamate; Glutaminic acid; 2-Aminoglutaric acid                                                               |
| 170.047 | C05938 | -4.5  | L-4-Hydroxyglutamate semialdehyde                                                                              |
| 170.058 | C00064 | -2.92 | L-Glutamine; L-2-Aminoglutaramic acid                                                                          |
| 170.058 | C00064 | -2.99 | L-Glutamine; L-2-Aminoglutaramic acid                                                                          |
| 170.086 | C00179 | -2.67 | Agmatine; (4-Aminobutyl) guanidine                                                                             |
| 170.086 | C00179 | -2.83 | Agmatine; (4-Aminobutyl) guanidine                                                                             |
| 170.086 | C00547 | -2.34 | L-Noradrenaline; Noradrenaline; Norepinephrine; Arterenol; 4-[(1R)-2-Amino-1-hydroxyethyl]-1,2-benzenediol     |
| 170.927 | C03232 | -2.74 | 3-Phosphonoxy pyruvate; 3-Phosphonoxy pyruvic acid; 3-Phosphohydroxy pyruvate                                  |
| 170.993 | C00433 | -2.01 | 2,5-Dioxopentanoate; 2-Oxoglutarate semialdehyde                                                               |
| 170.993 | C00433 | -2.02 | 2,5-Dioxopentanoate; 2-Oxoglutarate semialdehyde                                                               |
| 170.993 | C01353 | -1.81 | Carbonic acid; Dihydrogen carbonate; H2CO3                                                                     |
| 170.993 | C02362 | -1.68 | 2-Oxosuccinamate; 2-Oxosuccinamic acid; gamma-Aminooxaloacetate; Oxaloacetamide                                |
| 171.008 | C00062 | -2.97 | L-Arginine; (S)-2-Amino-5-guanidinovaleric acid; L-Arg                                                         |
| 171.008 | C01180 | -3.41 | 4-Methylthio-2-oxobutanoic acid; 4-Methylthio-2-oxobutanoate; 4-(Methylsulfanyl)-2-oxobutanoate                |
| 171.032 | C00300 | -2.49 | Creatine; alpha-Methylguanidino acetic acid; Methylglycocyanine                                                |
| 171.032 | C00300 | -2.76 | Creatine; alpha-Methylguanidino acetic acid; Methylglycocyanine                                                |
| 171.032 | C00300 | -2.78 | Creatine; alpha-Methylguanidino acetic acid; Methylglycocyanine                                                |
| 171.042 | C00025 | -3.55 | L-Glutamate; L-Glutamic acid; L-Glutaminic acid; Glutamate                                                     |
| 171.042 | C00025 | -3.58 | L-Glutamate; L-Glutamic acid; L-Glutaminic acid; Glutamate                                                     |
| 171.042 | C00302 | -3.15 | Glutamate; Glutaminic acid; 2-Aminoglutaric acid                                                               |
| 171.042 | C00302 | -3.33 | Glutamate; Glutaminic acid; 2-Aminoglutaric acid                                                               |
| 171.042 | C05938 | -2.8  | L-4-Hydroxyglutamate semialdehyde                                                                              |
| 171.042 | C05938 | -3.24 | L-4-Hydroxyglutamate semialdehyde                                                                              |
| 171.063 | C05576 | -1.78 | 3,4-Dihydroxyphenylethyleneglycol                                                                              |
| 171.075 | C00547 | -1.89 | L-Noradrenaline; Noradrenaline; Norepinephrine; Arterenol; 4-[(1R)-2-Amino-1-hydroxyethyl]-1,2-benzenediol     |
| 171.991 | C00975 | -2.45 | Dihydroxyfumarate; Dihydroxyfumaric acid                                                                       |
| 171.991 | C03459 | -2.67 | 2-Hydroxy-3-oxosuccinate; Oxaloglycolate                                                                       |
| 172.012 | C05922 | -1.66 | Formamidopyrimidine nucleoside triphosphate                                                                    |
| 172.029 | C00300 | -2.57 | Creatine; alpha-Methylguanidino acetic acid; Methylglycocyanine                                                |
| 172.029 | C00300 | -2.58 | Creatine; alpha-Methylguanidino acetic acid; Methylglycocyanine                                                |
| 172.042 | C00025 | -2.57 | L-Glutamate; L-Glutamic acid; L-Glutaminic acid; Glutamate                                                     |
| 173.012 | C01180 | -3.54 | 4-Methylthio-2-oxobutanoic acid; 4-Methylthio-2-oxobutanoate; 4-(Methylsulfanyl)-2-oxobutanoate                |
| 173.03  | C00300 | -3.71 | Creatine; alpha-Methylguanidino acetic acid; Methylglycocyanine                                                |
| 173.03  | C00300 | -3.92 | Creatine; alpha-Methylguanidino acetic acid; Methylglycocyanine                                                |
| 173.041 | C00073 | -2.36 | L-Methionine; Methionine; L-2-Amino-4methylthiobutyric acid                                                    |
| 173.041 | C00073 | -2.48 | L-Methionine; Methionine; L-2-Amino-4methylthiobutyric acid                                                    |
| 173.041 | C00300 | -3.4  | Creatine; alpha-Methylguanidino acetic acid; Methylglycocyanine                                                |
| 173.116 | C05341 | -3.14 | beta-Alanyl-L-lysine                                                                                           |
| 174.059 | C00123 | -2.55 | L-Leucine; 2-Amino-4-methylvaleric acid; (2S)-alpha-2-Amino-4-methylvaleric acid; (2S)-alpha-Leucine           |
| 174.11  | C00931 | -2.02 | Porphobilinogen                                                                                                |
| 174.127 | C00931 | -1.84 | Porphobilinogen                                                                                                |
| 174.967 | C05527 | -1.83 | 3-Sulfinylpyruvate; 3-Sulfinopyruvate                                                                          |
| 175.057 | C00300 | -3.36 | Creatine; alpha-Methylguanidino acetic acid; Methylglycocyanine                                                |
| 175.117 | C00062 | -2.87 | L-Arginine; (S)-2-Amino-5-guanidinovaleric acid; L-Arg                                                         |
| 175.995 | C00606 | -3.17 | 3-Sulfinyl-L-alanine; L-Cysteinesulfinic acid; 3-Sulphino-L-alanine; 3-Sulfinoalanine                          |
| 176.011 | C00108 | -1.7  | Anthranilate; Anthranilic acid; o-Aminobenzoic acid; Vitamin L1; 2-Aminobenzoate                               |
| 176.101 | C00327 | -2.56 | L-Citrulline; 2-Amino-5-ureidovaleric acid; Citrulline                                                         |
| 176.123 | C00062 | -2.2  | L-Arginine; (S)-2-Amino-5-guanidinovaleric acid; L-Arg                                                         |
| 176.974 | C05527 | -2.13 | 3-Sulfinylpyruvate; 3-Sulfinopyruvate                                                                          |
| 177.007 | C00606 | -1.98 | 3-Sulfinyl-L-alanine; L-Cysteinesulfinic acid; 3-Sulphino-L-alanine; 3-Sulfinoalanine                          |
| 177.007 | C00785 | -3.05 | Urocanate; Urocanic acid                                                                                       |
| 177.007 | C03508 | -2.8  | L-2-Amino-3-oxobutanoic acid; L-2-Amino-3-oxobutanoate; L-2-Amino-acetoacetate; (S)-2-Amino-3-oxobutanoic acid |
| 177.064 | C00499 | -2.74 | Allantoate; Allantoic acid                                                                                     |
| 177.064 | C03758 | -2.62 | Dopamine; 4-(2-Aminoethyl)-1,2-benzenediol; 4-(2-Aminoethyl)benzene-1,2-diol; 3,4-Dihydroxyphenethylamine      |
| 177.111 | C06425 | -1.68 | Icosanoic acid; Eicosanoic acid; Arachidic acid                                                                |
| 177.979 | C05823 | -3.34 | 3-Mercaptolactate; L-3-Mercaptolactate; (R)-3-Mercaptolactate                                                  |
| 178.007 | C00606 | -1.94 | 3-Sulfinyl-L-alanine; L-Cysteinesulfinic acid; 3-Sulphino-L-alanine; 3-Sulfinoalanine                          |
| 178.007 | C00785 | -2.08 | Urocanate; Urocanic acid                                                                                       |
| 178.007 | C00785 | -2.18 | Urocanate; Urocanic acid                                                                                       |
| 178.007 | C00785 | -2.24 | Urocanate; Urocanic acid                                                                                       |
| 178.027 | C00155 | -3.71 | L-Homocysteine; L-2-Amino-4-mercaptoputyric acid; Homocysteine                                                 |
| 178.074 | C03758 | -2.34 | Dopamine; 4-(2-Aminoethyl)-1,2-benzenediol; 4-(2-Aminoethyl)benzene-1,2-diol; 3,4-Dihydroxyphenethylamine      |
| 178.968 | C00988 | -3.77 | 2-Phosphoglycolate; Phosphoglycolic acid                                                                       |

|         |        |       |                                                                                                                |
|---------|--------|-------|----------------------------------------------------------------------------------------------------------------|
| 179.002 | C00785 | -3.98 | Urocanate; Urocanic acid                                                                                       |
| 179.002 | C00785 | -4.31 | Urocanate; Urocanic acid                                                                                       |
| 179.002 | C03508 | -3.05 | L-2-Amino-3-oxobutanoic acid; L-2-Amino-3-oxobutanoate; L-2-Amino-acetoacetate; (S)-2-Amino-3-oxobutanoic acid |
| 179.022 | C00188 | -2.11 | L-Threonine; 2-Amino-3-hydroxybutyric acid                                                                     |
| 179.022 | C05828 | -4.06 | Methylimidazoleacetic acid; Tele-methylimidazoleacetic acid; 1-Methyl-4-imidazoleacetic acid                   |
| 179.063 | C00499 | -1.89 | Allantoate; Allantoic acid                                                                                     |
| 179.083 | C05828 | -2.97 | Methylimidazoleacetic acid; Tele-methylimidazoleacetic acid; 1-Methyl-4-imidazoleacetic acid                   |
| 179.105 | C05642 | -2.73 | Formyl-N-acetyl-5-methoxykynurenamine                                                                          |
| 179.98  | C05823 | -2.35 | 3-Mercaptolactate; L-3-Mercaptolactate; (R)-3-Mercaptolactate                                                  |
| 180.003 | C00295 | -3.13 | Orotate; Orotic acid; Uracil-6-carboxylic acid                                                                 |
| 180.003 | C00785 | -3.69 | Urocanate; Urocanic acid                                                                                       |
| 180.003 | C00785 | -3.73 | Urocanate; Urocanic acid                                                                                       |
| 180.003 | C03824 | -2.27 | 2-Aminomuconate semialdehyde; 2-Aminomuconate 6-semialdehyde                                                   |
| 180.022 | C05828 | -2.72 | Methylimidazoleacetic acid; Tele-methylimidazoleacetic acid; 1-Methyl-4-imidazoleacetic acid                   |
| 180.022 | C05828 | -2.78 | Methylimidazoleacetic acid; Tele-methylimidazoleacetic acid; 1-Methyl-4-imidazoleacetic acid                   |
| 180.022 | C05828 | -2.83 | Methylimidazoleacetic acid; Tele-methylimidazoleacetic acid; 1-Methyl-4-imidazoleacetic acid                   |
| 180.043 | C03680 | -2.25 | 4-Imidazolone-5-propanoate; 4-Imidazolone-5-propionic acid; 4,5-Dihydro-4-oxo-5-imidazolepropanoate            |
| 180.043 | C03680 | -2.41 | 4-Imidazolone-5-propanoate; 4-Imidazolone-5-propionic acid; 4,5-Dihydro-4-oxo-5-imidazolepropanoate            |
| 181.011 | C00295 | -2.13 | Orotate; Orotic acid; Uracil-6-carboxylic acid                                                                 |
| 181.011 | C00785 | -3.07 | Urocanate; Urocanic acid                                                                                       |
| 181.011 | C03824 | -2.98 | 2-Aminomuconate semialdehyde; 2-Aminomuconate 6-semialdehyde                                                   |
| 181.011 | C03824 | -3.08 | 2-Aminomuconate semialdehyde; 2-Aminomuconate 6-semialdehyde                                                   |
| 181.029 | C05828 | -2.62 | Methylimidazoleacetic acid; Tele-methylimidazoleacetic acid; 1-Methyl-4-imidazoleacetic acid                   |
| 181.029 | C05828 | -2.65 | Methylimidazoleacetic acid; Tele-methylimidazoleacetic acid; 1-Methyl-4-imidazoleacetic acid                   |
| 182.008 | C03824 | -1.9  | 2-Aminomuconate semialdehyde; 2-Aminomuconate 6-semialdehyde                                                   |
| 182.081 | C00082 | -3.1  | L-Tyrosine; (S)-3-(p-Hydroxyphenyl)alanine; (S)-2-Amino-3-(p-hydroxyphenyl)propionic acid; Tyrosine            |
| 182.993 | C00160 | -2.62 | Glycolate; Glycolic acid; Hydroxyacetic acid                                                                   |
| 183.017 | C00025 | -2.58 | L-Glutamate; L-Glutamic acid; L-Glutaminic acid; Glutamate                                                     |
| 183.062 | C05582 | -2.06 | Homovanillate; Homovanillic acid; 3-Methoxy-4-hydroxyphenylacetate                                             |
| 183.062 | C05583 | -3.27 | 3-Methoxy-4-hydroxyphenylglycolaldehyde                                                                        |
| 183.113 | C05476 | -5.49 | Tetrahydrocorticosterone                                                                                       |
| 183.976 | C03232 | -3.16 | 3-Phosphonoxypropionate; 3-Phosphonoxypropionic acid; 3-Phosphohydroxypropionate                               |
| 184.002 | C00940 | -3.94 | 2-Oxoglutarate; 2-Oxoglutaric acid; alpha-Ketoglutarate; 2-Ketoglutarate                                       |
| 184.002 | C05572 | -3.93 | 4-Oxoglutarate; 4-Ketoglutarate                                                                                |
| 184.094 | C00109 | -2.28 | 2-Oxobutanoate; 2-Ketobutyric acid; 2-Oxobutyric acid; 2-Oxobutyrate; 2-Oxobutanoic acid                       |
| 185.063 | C00152 | -2.21 | L-Asparagine; 2-Aminosuccinamic acid                                                                           |
| 185.096 | C00788 | -2.55 | L-Adrenaline; (R)-(-)-Adrenaline; (R)-(-)-Epinephrine; (R)-(-)-Epinephrine; (R)-(-)-Adrenaline                 |
| 185.096 | C00788 | -2.74 | L-Adrenaline; (R)-(-)-Adrenaline; (R)-(-)-Epinephrine; (R)-(-)-Epinephrine; (R)-(-)-Adrenaline                 |
| 185.096 | C05589 | -1.98 | L-Normetanephrine                                                                                              |
| 185.096 | C05589 | -2.23 | L-Normetanephrine                                                                                              |
| 185.153 | C05665 | -2.51 | 3-Aminopropanal; beta-Aminopropionaldehyde                                                                     |
| 185.177 | C00064 | -1.99 | L-Glutamine; L-2-Aminoglutaric acid                                                                            |
| 185.942 | C03232 | -3.71 | 3-Phosphonoxypropionate; 3-Phosphonoxypropionic acid; 3-Phosphohydroxypropionate                               |
| 186.014 | C00025 | -1.86 | L-Glutamate; L-Glutamic acid; L-Glutaminic acid; Glutamate                                                     |
| 186.097 | C01035 | -4.22 | 4-Guanidinobutanoate; 4-Guanidinobutyric acid                                                                  |
| 186.965 | C00975 | -4.31 | Dihydroxyfumarate; Dihydroxyfumaric acid                                                                       |
| 186.965 | C03459 | -4.6  | 2-Hydroxy-3-oxosuccinate; Oxalloglycolate                                                                      |
| 186.993 | C00117 | -2.95 | D-Ribose 5-phosphate; Ribose 5-phosphate                                                                       |
| 187.008 | C00940 | -2.6  | 2-Oxoglutarate; 2-Oxoglutaric acid; alpha-Ketoglutarate; 2-Ketoglutarate                                       |
| 187.008 | C05572 | -2.17 | 4-Oxoglutarate; 4-Ketoglutarate                                                                                |
| 187.948 | C00152 | -3.12 | L-Asparagine; 2-Aminosuccinamic acid                                                                           |
| 187.971 | C00975 | -2.31 | Dihydroxyfumarate; Dihydroxyfumaric acid                                                                       |
| 187.971 | C03459 | -2.8  | 2-Hydroxy-3-oxosuccinate; Oxalloglycolate                                                                      |
| 188.023 | C00025 | -3.01 | L-Glutamate; L-Glutamic acid; L-Glutaminic acid; Glutamate                                                     |
| 188.023 | C00302 | -2.21 | Glutamate; Glutaminic acid; 2-Aminoglutaric acid                                                               |
| 188.023 | C01005 | -1.97 | O-Phospho-L-serine; L-O-Phosphoserine; 3-Phosphoserine; Dextroserine; 3-Phospho-L-serine                       |
| 188.023 | C02532 | -1.98 | O-Phospho-D-serine; D-O-Phosphoserine                                                                          |
| 188.07  | C00079 | -2.37 | L-Phenylalanine; (S)-alpha-Amino-beta-phenylpropionic acid                                                     |
| 188.102 | C06425 | -1.85 | Icosanoic acid; Eicosanoic acid; Arachidic acid                                                                |
| 188.162 | C00956 | -1.89 | L-2-Amino adipate; L-alpha-Amino adipate; L-alpha-Amino adipic acid; L-2-Amino adipic acid                     |
| 188.18  | C00612 | -2.66 | N1-Acetylspermidine                                                                                            |
| 188.967 | C00975 | -2.3  | Dihydroxyfumarate; Dihydroxyfumaric acid                                                                       |
| 188.967 | C00975 | -2.43 | Dihydroxyfumarate; Dihydroxyfumaric acid                                                                       |
| 188.967 | C03459 | -2.3  | 2-Hydroxy-3-oxosuccinate; Oxalloglycolate                                                                      |
| 188.967 | C03459 | -2.48 | 2-Hydroxy-3-oxosuccinate; Oxalloglycolate                                                                      |
| 189.074 | C00079 | -2.85 | L-Phenylalanine; (S)-alpha-Amino-beta-phenylpropionic acid                                                     |
| 189.110 | C00337 | -1.88 | (S)-Dihydroorotate; (S)-4,5-Dihydroorotate; L-Dihydroorotate; L-Dihydroorotic acid; Dihydro-L-rotic acid       |
| 190.052 | C01717 | -2.77 | 4-Hydroxy-2-quinolinecarboxylic acid; Kynurenic acid; Kynurenate                                               |
| 190.075 | C00079 | -1.85 | L-Phenylalanine; (S)-alpha-Amino-beta-phenylpropionic acid                                                     |
| 190.075 | C00624 | -2.41 | N-Acetyl-L-glutamate; N-Acetyl-L-glutamic acid                                                                 |
| 190.124 | C05711 | -1.92 | gamma-Glutamyl-beta-cyanoalanine                                                                               |
| 190.965 | C00975 | -1.86 | Dihydroxyfumarate; Dihydroxyfumaric acid                                                                       |
| 190.965 | C03459 | -2.14 | 2-Hydroxy-3-oxosuccinate; Oxalloglycolate                                                                      |
| 190.987 | C00606 | -2.39 | 3-Sulphino-L-alanine; L-Cysteinesulfinic acid; 3-Sulphino-L-alanine; 3-Sulphinoalanine                         |
| 191.009 | C00062 | -2.75 | L-Arginine; (S)-2-Amino-5-guanidinovaleric acid; L-Arg                                                         |
| 191.04  | C01236 | -1.91 | D-Glucono-1,5-lactone 6-phosphate; 6-Phospho-D-glucono-1,5-lactone                                             |
| 191.072 | C00624 | -2.45 | N-Acetyl-L-glutamate; N-Acetyl-L-glutamic acid                                                                 |
| 191.072 | C00624 | -2.79 | N-Acetyl-L-glutamate; N-Acetyl-L-glutamic acid                                                                 |
| 191.104 | C00233 | -2.26 | 4-Methyl-2-oxopentanoate; 2-Oxoisocaproate                                                                     |
| 191.104 | C05699 | -2.47 | L-Selenocystathionine                                                                                          |
| 191.125 | C00956 | -2.14 | L-2-Amino adipate; L-alpha-Amino adipate; L-alpha-Amino adipic acid; L-2-Amino adipic acid                     |
| 191.977 | C00606 | -3.11 | 3-Sulphino-L-alanine; L-Cysteinesulfinic acid; 3-Sulphino-L-alanine; 3-Sulphinoalanine                         |
| 192.061 | C00547 | -2.71 | L-Noradrenaline; Noradrenaline; Norepinephrine; Arterenol; 4-[(1R)-2-Amino-1-hydroxyethyl]-1,2-benzenediol     |

|         |        |       |                                                                                                                   |
|---------|--------|-------|-------------------------------------------------------------------------------------------------------------------|
| 192.977 | C00606 | -2.48 | 3-Sulfinol-L-alanine; L-Cysteinesulfinic acid; 3-Sulphino-L-alanine; 3-Sulfinolalanine                            |
| 192.977 | C00606 | -2.48 | 3-Sulfinol-L-alanine; L-Cysteinesulfinic acid; 3-Sulphino-L-alanine; 3-Sulfinolalanine                            |
| 192.977 | C03232 | -1.85 | 3-Phosphonoxypropionate; 3-Phosphonoxypropionic acid; 3-Phosphohydroxypropionate                                  |
| 193.001 | C00086 | -5.18 | Urea; Carbamide                                                                                                   |
| 193.043 | C03758 | -2.02 | Dopamine; 4-(2-Aminoethyl)-1,2-benzenediol; 4-(2-Aminoethyl)benzene-1,2-diol                                      |
| 193.043 | C03758 | -2.13 | Dopamine; 4-(2-Aminoethyl)-1,2-benzenediol; 4-(2-Aminoethyl)benzene-1,2-diol                                      |
| 193.043 | C03758 | -2.16 | Dopamine; 4-(2-Aminoethyl)-1,2-benzenediol; 4-(2-Aminoethyl)benzene-1,2-diol                                      |
| 193.043 | C05576 | -2.76 | 3,4-Dihydroxyphenylethylenglycol                                                                                  |
| 193.158 | C12287 | -2.32 | beta-Ionone; trans-beta-Ionone                                                                                    |
| 194.042 | C01693 | -3.64 | L-Dopachrome; 2-L-Carboxy-2,3-dihydroindole-5,6-quinone                                                           |
| 194.042 | C03758 | -3.04 | Dopamine; 4-(2-Aminoethyl)-1,2-benzenediol; 4-(2-Aminoethyl)benzene-1,2-diol                                      |
| 194.042 | C03758 | -3.19 | Dopamine; 4-(2-Aminoethyl)-1,2-benzenediol; 4-(2-Aminoethyl)benzene-1,2-diol                                      |
| 194.042 | C03758 | -3.32 | Dopamine; 4-(2-Aminoethyl)-1,2-benzenediol; 4-(2-Aminoethyl)benzene-1,2-diol                                      |
| 194.042 | C03758 | -3.4  | Dopamine; 4-(2-Aminoethyl)-1,2-benzenediol; 4-(2-Aminoethyl)benzene-1,2-diol                                      |
| 194.042 | C04185 | -3.49 | 5,6-Dihydroxyindole-2-carboxylate; DHICA                                                                          |
| 194.042 | C15566 | -3.38 | D-Dopachrome                                                                                                      |
| 194.091 | C05298 | -1.8  | 2-Hydroxyestrone                                                                                                  |
| 194.925 | C03232 | -3.1  | 3-Phosphonoxypropionate; 3-Phosphonoxypropionic acid; 3-Phosphohydroxypropionate                                  |
| 194.962 | C00417 | -2.58 | cis-Aconitate; cis-Aconitic acid                                                                                  |
| 195.018 | C03680 | -2.6  | 4-Imidazolone-5-propanoate; 4-Imidazolone-5-propionic acid; 4,5-Dihydro-4-oxo-5-imidazolepropanoate               |
| 195.043 | C01693 | -2.47 | L-Dopachrome; 2-L-Carboxy-2,3-dihydroindole-5,6-quinone                                                           |
| 195.043 | C01693 | -2.78 | L-Dopachrome; 2-L-Carboxy-2,3-dihydroindole-5,6-quinone                                                           |
| 195.043 | C03758 | -2.95 | Dopamine; 4-(2-Aminoethyl)-1,2-benzenediol; 4-(2-Aminoethyl)benzene-1,2-diol                                      |
| 195.043 | C03758 | -2.96 | Dopamine; 4-(2-Aminoethyl)-1,2-benzenediol; 4-(2-Aminoethyl)benzene-1,2-diol                                      |
| 195.043 | C04185 | -2.73 | 5,6-Dihydroxyindole-2-carboxylate; DHICA                                                                          |
| 195.043 | C15566 | -2.74 | D-Dopachrome                                                                                                      |
| 195.133 | C05642 | -3.24 | Formyl-N-acetyl-5-methoxykynurenine                                                                               |
| 195.967 | C00062 | -3.66 | L-Arginine; (S)-2-Amino-5-guanidinovaleric acid; L-Arg                                                            |
| 195.967 | C00606 | -2.88 | 3-Sulfinol-L-alanine; L-Cysteinesulfinic acid; 3-Sulphino-L-alanine; 3-Sulfinolalanine                            |
| 196.017 | C03680 | -4.79 | 4-Imidazolone-5-propanoate; 4-Imidazolone-5-propionic acid; 4,5-Dihydro-4-oxo-5-imidazolepropanoate               |
| 196.017 | C03680 | -5.01 | 4-Imidazolone-5-propanoate; 4-Imidazolone-5-propionic acid; 4,5-Dihydro-4-oxo-5-imidazolepropanoate               |
| 196.017 | C03680 | -5.03 | 4-Imidazolone-5-propanoate; 4-Imidazolone-5-propionic acid; 4,5-Dihydro-4-oxo-5-imidazolepropanoate               |
| 196.040 | C03758 | -2.97 | Dopamine; 4-(2-Aminoethyl)-1,2-benzenediol; 4-(2-Aminoethyl)benzene-1,2-diol; 3,4-Dihydroxyphenethylamine         |
| 196.916 | C00024 | -1.92 | Acetyl-CoA; Acetyl coenzyme A                                                                                     |
| 196.973 | C00417 | -2.41 | cis-Aconitate; cis-Aconitic acid                                                                                  |
| 196.994 | C00337 | -2.43 | (S)-Dihydroorotate; (S)-4,5-Dihydroorotate; L-Dihydroorotate; L-Dihydroorotic acid; Dihydro-L-rotic acid          |
| 197.012 | C00026 | -3.58 | 2-Oxoglutarate; Oxoglutaric acid; 2-Ketoglutaric acid; alpha-Ketoglutaric acid                                    |
| 197.012 | C03680 | -4.21 | 4-Imidazolone-5-propanoate; 4-Imidazolone-5-propionic acid; 4,5-Dihydro-4-oxo-5-imidazolepropanoate               |
| 197.012 | C03680 | -4.61 | 4-Imidazolone-5-propanoate; 4-Imidazolone-5-propionic acid; 4,5-Dihydro-4-oxo-5-imidazolepropanoate               |
| 197.057 | C00439 | -1.66 | N-Formimino-L-glutamate; N-Formimidoyl-L-glutamate                                                                |
| 197.057 | C16674 | -1.8  | Formylisoglutamine; DL-Formylisoglutamine                                                                         |
| 197.096 | C00062 | -3.23 | L-Arginine; (S)-2-Amino-5-guanidinovaleric acid; L-Arg                                                            |
| 197.979 | C03406 | -1.85 | N-(L-Arginino)succinate; 2-(Nomega-L-Arginino)succinate; L-Argininosuccinate; L-Argininosuccinic acid             |
| 198.001 | C00337 | -2.91 | (S)-Dihydroorotate; (S)-4,5-Dihydroorotate; L-Dihydroorotate; L-Dihydroorotic acid; Dihydro-L-rotic acid          |
| 198.001 | C00337 | -2.98 | (S)-Dihydroorotate; (S)-4,5-Dihydroorotate; L-Dihydroorotate; L-Dihydroorotic acid; Dihydro-L-rotic acid          |
| 198.012 | C03680 | -3.78 | 4-Imidazolone-5-propanoate; 4-Imidazolone-5-propionic acid; 4,5-Dihydro-4-oxo-5-imidazolepropanoate               |
| 198.042 | C01042 | -1.88 | N-Acetyl-L-aspartate; N-Acetyl-L-aspartic acid                                                                    |
| 198.042 | C01045 | -3.44 | N-Formyl-L-glutamate                                                                                              |
| 198.084 | C00327 | -2.72 | L-Citrulline; 2-Amino-5-ureidovaleric acid; Citrulline                                                            |
| 198.127 | C00931 | -1.74 | Porphobilinogen                                                                                                   |
| 198.990 | C00337 | -3.11 | (S)-Dihydroorotate; (S)-4,5-Dihydroorotate; L-Dihydroorotate; L-Dihydroorotic acid; Dihydro-L-rotic acid          |
| 198.990 | C00337 | -3.4  | (S)-Dihydroorotate; (S)-4,5-Dihydroorotate; L-Dihydroorotate; L-Dihydroorotic acid; Dihydro-L-rotic acid          |
| 199.031 | C00438 | -1.94 | N-Carbamoyl-L-aspartate                                                                                           |
| 199.031 | C01045 | -3.28 | N-Formyl-L-glutamate                                                                                              |
| 199.048 | C00499 | -3.79 | Allantoate; Allantoic acid                                                                                        |
| 199.069 | C05382 | -1.72 | Sedoheptulose 7-phosphate; D-Sedoheptulose 7-phosphate; D-alto-Heptulose 7-phosphate                              |
| 199.145 | C05476 | -5.09 | Tetrahydrocorticosterone                                                                                          |
| 199.170 | C05665 | -2.11 | 3-Aminopropanal; beta-Aminopropion aldehyde                                                                       |
| 199.989 | C00337 | -2.1  | (S)-Dihydroorotate; (S)-4,5-Dihydroorotate; L-Dihydroorotate; L-Dihydroorotic acid; Dihydro-L-rotic acid          |
| 200.043 | C00499 | -3.48 | Allantoate; Allantoic acid                                                                                        |
| 200.043 | C00499 | -3.54 | Allantoate; Allantoic acid                                                                                        |
| 200.043 | C01042 | -2.08 | N-Acetyl-L-aspartate; N-Acetyl-L-aspartic acid                                                                    |
| 200.043 | C01045 | -1.75 | N-Formyl-L-glutamate                                                                                              |
| 200.068 | C00109 | -2.22 | 2-Oxobutanoate; 2-Ketobutyric acid; 2-Oxobutyric acid; 2-Oxobutyrates; 2-Oxobutanoic acid; alpha-Ketobutyric acid |
| 201.045 | C00499 | -2.25 | Allantoate; Allantoic acid                                                                                        |
| 201.086 | C00750 | -2.07 | Spermine; N,N'-Bis(3-aminopropyl)-1,4-butanediamine                                                               |
| 201.141 | C00637 | -1.76 | Indole-3-acetaldehyde; 2-(Indol-3-yl)acetaldehyde; Indoleacetaldehyde                                             |
| 202.066 | C00233 | -1.66 | 4-Methyl-2-oxopentanoate; 2-Oxoisocaproate                                                                        |
| 202.088 | C00078 | -1.92 | L-Tryptophan; Tryptophan; (S)-alpha-Amino-beta-(3-indolyl)-propionic acid                                         |
| 202.117 | C05642 | -2.91 | Formyl-N-acetyl-5-methoxykynurenine                                                                               |
| 203.052 | C00031 | -2.95 | D-Glucose; Grape sugar; Dextrose; Glucose; D-Glucopyranose                                                        |
| 203.052 | C00095 | -4.46 | D-Fructose; Levulose; Fruit sugar; D-arabino-Hexulose                                                             |
| 203.052 | C00124 | -2.31 | D-Galactose; D-Galactopyranose                                                                                    |
| 203.052 | C00137 | -1.85 | myo-Inositol; D-myo-Inositol; 1D-myo-Inositol; L-myo-Inositol; 1L-myo-Inositol; meso-Inositol; Inositol           |
| 203.052 | C00159 | -3.5  | D-Mannose; Mannose; Seminose; Carubinose; D-Mannopyranose                                                         |
| 203.052 | C00221 | -3.14 | beta-D-Glucose; beta-D-Glucopyranose                                                                              |
| 203.052 | C00267 | -3.24 | alpha-D-Glucose                                                                                                   |
| 203.052 | C00984 | -2.01 | alpha-D-Galactose                                                                                                 |
| 203.052 | C01798 | -2.73 | D-Glucoside                                                                                                       |
| 203.052 | C02336 | -3.51 | beta-D-Fructose; beta-Fruit sugar; beta-D-arabino-Hexulose; beta-Levulose; Fructose                               |
| 203.052 | C02478 | -3.04 | beta-D-Mannoside                                                                                                  |
| 204.018 | C00166 | -2.34 | Phenylpyruvate; Phenylpyruvic acid; alpha-Ketohydrocinnamic acid; keto-Phenylpyruvate                             |
| 204.056 | C00031 | -2.06 | D-Glucose; Grape sugar; Dextrose; Glucose; D-Glucopyranose                                                        |

|         |        |       |                                                                                                                |
|---------|--------|-------|----------------------------------------------------------------------------------------------------------------|
| 204.056 | C00095 | -3.27 | D-Fructose; Levulose; Fruit sugar; D-arabino-Hexulose                                                          |
| 204.056 | C00159 | -2.25 | D-Mannose; Mannose; Seminose; Carubinose; D-Mannopyranose                                                      |
| 204.056 | C00221 | -1.84 | beta-D-Glucose; beta-D-Glucopyranose                                                                           |
| 204.056 | C00267 | -2.05 | alpha-D-Glucose                                                                                                |
| 204.056 | C01798 | -1.75 | D-Glucoside                                                                                                    |
| 204.056 | C02336 | -2.38 | beta-D-Fructose; beta-Fruit sugar; beta-D-arabino-Hexulose; beta-Levulose; Fructose                            |
| 204.056 | C02478 | -2.05 | beta-D-Mannoside                                                                                               |
| 205.001 | C00785 | -2.45 | Urocanate; Urocanic acid                                                                                       |
| 205.057 | C00031 | -2.85 | D-Glucose; Grape sugar; Dextrose; Glucose; D-Glucopyranose                                                     |
| 205.057 | C00095 | -4.3  | D-Fructose; Levulose; Fruit sugar; D-arabino-Hexulose                                                          |
| 205.057 | C00124 | -1.9  | D-Galactose; D-Galactopyranose                                                                                 |
| 205.057 | C00137 | -2.02 | myo-Inositol; D-myo-Inositol; 1D-myo-Inositol; L-myo-Inositol; 1L-myo-Inositol; meso-Inositol; Inositol        |
| 205.057 | C00159 | -3.29 | D-Mannose; Mannose; Seminose; Carubinose; D-Mannopyranose                                                      |
| 205.057 | C00221 | -3.18 | beta-D-Glucose; beta-D-Glucopyranose                                                                           |
| 205.057 | C00267 | -3.23 | alpha-D-Glucose                                                                                                |
| 205.057 | C00984 | -1.75 | alpha-D-Galactose                                                                                              |
| 205.057 | C01798 | -2.94 | D-Glucoside                                                                                                    |
| 205.057 | C02336 | -4.01 | beta-D-Fructose; beta-Fruit sugar; beta-D-arabino-Hexulose; beta-Levulose; Fructose                            |
| 205.057 | C02478 | -3.01 | beta-D-Mannoside                                                                                               |
| 205.095 | C00078 | -2.61 | L-Tryptophan; Tryptophan; (S)-alpha-Amino-beta-(3-indolyl)-propionic acid                                      |
| 205.968 | C00940 | -2.63 | 2-Oxoglutaramate; 2-Oxoglutaramic acid; alpha-Ketoglutaramate; 2-Ketoglutaramate                               |
| 206.005 | C03508 | -2.48 | L-2-Amino-3-oxobutanoic acid; L-2-Amino-3-oxobutanoate; L-2-Amino-acetoacetate; (S)-2-Amino-3-oxobutanoic acid |
| 206.033 | C00025 | -3.38 | L-Glutamate; L-Glutamic acid; L-Glutaminic acid; Glutamate                                                     |
| 206.068 | C01693 | -3.69 | L-Dopachrome; 2-L-Carboxy-2,3-dihydroindole-5,6-quinone                                                        |
| 206.068 | C02051 | -4.53 | Lipoylprotein; H-Protein-lipoyllysine; [GCSH]-N6-lipoyl-L-lysine; [CcvH]-N6-lipoyl-L-lysine                    |
| 206.068 | C15972 | -2.2  | Enzyme N6-(lipoyl)lysine; Lipoamide-E; [E2 protein]-N6-lipoyl-L-lysine                                         |
| 206.098 | C00078 | -1.96 | L-Tryptophan; Tryptophan; (S)-alpha-Amino-beta-(3-indolyl)-propionic acid                                      |
| 206.098 | C00078 | -2.07 | L-Tryptophan; Tryptophan; (S)-alpha-Amino-beta-(3-indolyl)-propionic acid                                      |
| 206.151 | C00612 | -1.76 | N1-Acetylspermidine                                                                                            |
| 206.19  | C05648 | -1.69 | 5-Hydroxy-N-formylkynurenine; 5-Hydroxy-N-formyl-L-kynurenine                                                  |
| 207.953 | C00160 | -3.7  | Glycolate; Glycolic acid; Hydroxyacetic acid                                                                   |
| 207.988 | C03406 | -2.65 | N-(L-Arginino)succinate; 2-(Nomega-L-Arginino)succinate; L-Argininosuccinate; L-Argininosuccinic acid          |
| 207.988 | C03722 | -2.68 | Quinolate; Pyridine-2,3-dicarboxylate; Quinolinic acid; 2,3-Pyridinedicarboxylic acid                          |
| 207.988 | C03722 | -2.71 | Quinolate; Pyridine-2,3-dicarboxylate; Quinolinic acid; 2,3-Pyridinedicarboxylic acid                          |
| 207.988 | C03722 | -2.88 | Quinolate; Pyridine-2,3-dicarboxylate; Quinolinic acid; 2,3-Pyridinedicarboxylic acid                          |
| 208.11  | C03852 | -4.87 | Androstan-3alpha,17beta-diol; 5alpha-Androstan-3alpha,17beta-diol                                              |
| 208.818 | C00062 | -2.65 | L-Arginine; (S)-2-Amino-5-guanidinovaleric acid; L-Arg                                                         |
| 208.978 | C00197 | -3.5  | 3-Phospho-D-glycerate; D-Glycerate 3-phosphate; 3-Phospho-(R)-glycerate; 3-Phosphoglycerate                    |
| 208.978 | C00631 | -3.51 | 2-Phospho-D-glycerate; D-Glycerate 2-phosphate; 2-Phospho-(R)-glycerate                                        |
| 209.033 | C15650 | -3.64 | 2,3-Diketo-5-methylthiopentyl-1-phosphate; 5-(Methylthio)-2,3-dioxopentyl phosphate                            |
| 209.048 | C00499 | -3.71 | Allantoate; Allantoic acid                                                                                     |
| 209.078 | C00931 | -1.81 | Porphobilinogen                                                                                                |
| 209.995 | C00062 | -3.15 | L-Arginine; (S)-2-Amino-5-guanidinovaleric acid; L-Arg                                                         |
| 210.05  | C00279 | -2.7  | D-Erythrose 4-phosphate                                                                                        |
| 210.078 | C00931 | -2.32 | Porphobilinogen                                                                                                |
| 210.115 | C06425 | -2.99 | Icosanoic acid; Eicosanoic acid; Arachidic acid                                                                |
| 210.973 | C03680 | -2.51 | 4-Imidazolone-5-propanoate; 4-Imidazolone-5-propionic acid; 4,5-Dihydro-4-oxo-5-imidazolepropanoate            |
| 211.011 | C05565 | -3.82 | Hydantoin-5-propionate; Hydantoin-propionate                                                                   |
| 211.128 | C00735 | -4.59 | Cortisol; Hydrocortisone; 11beta,17alpha,21-Trihydroxy-4-pregnene-3,20-dione; Kendall's compound F             |
| 212.085 | C03758 | -2.37 | Dopamine; 4-(2-Aminoethyl)-1,2-benzenediol; 4-(2-Aminoethyl)benzene-1,2-diol; 3,4-Dihydroxyphenethylamine      |
| 212.949 | C00975 | -4.07 | Dihydroxyfumarate; Dihydroxyfumaric acid                                                                       |
| 212.975 | C00417 | -3.08 | cis-Aconitate; cis-Aconitic acid                                                                               |
| 212.975 | C00785 | -4.51 | Urocanate; Urocanic acid                                                                                       |
| 213.046 | C00624 | -2    | N-Acetyl-L-glutamate; N-Acetyl-L-glutamic acid                                                                 |
| 213.077 | C06213 | -2.35 | N-Methyltryptamine; N-Methylindoleethylamine; 1-Methyl-2-(3-indolyl)ethylamine                                 |
| 213.081 | C05699 | -2.99 | L-Selenocystathionine                                                                                          |
| 213.081 | C06213 | -2.02 | N-Methyltryptamine; N-Methylindoleethylamine; 1-Methyl-2-(3-indolyl)ethylamine                                 |
| 213.081 | C06213 | -2.13 | N-Methyltryptamine; N-Methylindoleethylamine; 1-Methyl-2-(3-indolyl)ethylamine                                 |
| 213.975 | C00417 | -3.17 | cis-Aconitate; cis-Aconitic acid                                                                               |
| 214.073 | C00062 | -2.33 | L-Arginine; (S)-2-Amino-5-guanidinovaleric acid; L-Arg                                                         |
| 214.073 | C00062 | -2.36 | L-Arginine; (S)-2-Amino-5-guanidinovaleric acid; L-Arg                                                         |
| 214.073 | C06751 | -2.05 | Prenyl-L-cysteine; S-Prenyl-L-cysteine                                                                         |
| 214.089 | C05699 | -2.57 | L-Selenocystathionine                                                                                          |
| 214.113 | C00499 | -2.71 | Allantoate; Allantoic acid                                                                                     |
| 214.984 | C00417 | -3.02 | cis-Aconitate; cis-Aconitic acid                                                                               |
| 214.984 | C00417 | -3.26 | cis-Aconitate; cis-Aconitic acid                                                                               |
| 215.069 | C00062 | -4.65 | L-Arginine; (S)-2-Amino-5-guanidinovaleric acid; L-Arg                                                         |
| 215.069 | C00062 | -4.85 | L-Arginine; (S)-2-Amino-5-guanidinovaleric acid; L-Arg                                                         |
| 215.099 | C02140 | -3    | Corticosterone; 11beta,21-Dihydroxy-4-pregnene-3,20-dione; Kendall's compound B; Reichstein's substance H      |
| 215.205 | C01888 | -2    | Aminoacetone; 1-Amino-2-propanone                                                                              |
| 215.991 | C04409 | -2.86 | 2-Amino-3-carboxymuconate semialdehyde; 2-Amino-3-(3-oxoprop-1-enyl)-but-2-enedioate                           |
| 216.056 | C00327 | -2.06 | L-Citrulline; 2-Amino-5-ureidovaleric acid; Citrulline                                                         |
| 216.084 | C00062 | -1.74 | L-Arginine; (S)-2-Amino-5-guanidinovaleric acid; L-Arg                                                         |
| 216.088 | C05576 | -3.03 | 3,4-Dihydroxyphenylethyleneglycol                                                                              |
| 217.002 | C01419 | -1.87 | Cys-Gly; L-Cysteinylglycine                                                                                    |
| 217.002 | C05729 | -1.73 | R-S-Cysteinylglycine                                                                                           |
| 217.955 | C00160 | -3.31 | Glycolate; Glycolic acid; Hydroxyacetic acid                                                                   |
| 218.009 | C01419 | -2.58 | Cys-Gly; L-Cysteinylglycine                                                                                    |
| 218.009 | C01419 | -2.74 | Cys-Gly; L-Cysteinylglycine                                                                                    |
| 218.009 | C05729 | -2.45 | R-S-Cysteinylglycine                                                                                           |
| 218.009 | C05729 | -2.48 | R-S-Cysteinylglycine                                                                                           |
| 218.919 | C00197 | -2.21 | 3-Phospho-D-glycerate; D-Glycerate 3-phosphate; 3-Phospho-(R)-glycerate; 3-Phosphoglycerate                    |
| 219.098 | C00791 | -3.76 | Creatinine; 1-Methylglycocyamidine                                                                             |

|         |        |       |                                                                                                                  |
|---------|--------|-------|------------------------------------------------------------------------------------------------------------------|
| 219.957 | C00160 | -3.21 | Glycolate; Glycolic acid; Hydroxyacetic acid                                                                     |
| 220.029 | C00064 | -1.68 | L-Glutamine; L-2-Aminoglutaramic acid                                                                            |
| 220.064 | C00134 | -2.15 | Putrescine; 1,4-Butanediamine; 1,4-Diaminobutane; Tetramethylenediamine; Butane-1,4-diamine                      |
| 220.979 | C03372 | -1.69 | Acylglycerone phosphate; Dihydroxyacetone phosphate acyl ester; 1-Acyl-glycerone 3-phosphate                     |
| 220.998 | C00188 | -1.88 | L-Threonine; 2-Amino-3-hydroxybutyric acid                                                                       |
| 221.024 | C05583 | -2.74 | 3-Methoxy-4-hydroxyphenylglycolaldehyde                                                                          |
| 221.173 | C00239 | -3.15 | dCMP; Deoxycytidylic acid; Deoxycytidine monophosphate; Deoxycytidylate; 2'-Deoxycytidine 5'-monophosphate       |
| 222.007 | C00109 | -2    | 2-Oxobutanoate; 2-Ketobutyric acid; 2-Oxobutyric acid; 2-Oxobutyrate; 2-Oxobutanoic acid; alpha-Ketobutyric acid |
| 222.093 | C00931 | -2.89 | Porphobilinogen                                                                                                  |
| 222.941 | C03232 | -2.31 | 3-Phosphonoxypropionate; 3-Phosphonoxypropionic acid; 3-Phosphohydroxypropionate                                 |
| 222.967 | C03671 | -4.14 | 2-Pyrone-4,6-dicarboxylate                                                                                       |
| 223.012 | C03508 | -2.45 | L-2-Amino-3-oxobutanoic acid; L-2-Amino-3-oxobutanoate; L-2-Amino-acetoacetate; (S)-2-Amino-3-oxobutanoic acid   |
| 223.205 | C00931 | -1.72 | Porphobilinogen                                                                                                  |
| 223.943 | C03232 | -2.75 | 3-Phosphonoxypropionate; 3-Phosphonoxypropionic acid; 3-Phosphohydroxypropionate                                 |
| 223.943 | C03232 | -2.82 | 3-Phosphonoxypropionate; 3-Phosphonoxypropionic acid; 3-Phosphohydroxypropionate                                 |
| 223.998 | C04409 | -2.37 | 2-Amino-3-carboxymuconate semialdehyde; 2-Amino-3-(3-oxoprop-1-enyl)-but-2-enedioate                             |
| 224.095 | C05576 | -2.06 | 3,4-Dihydroxyphenylethyleneglycol                                                                                |
| 224.202 | C00233 | -2.24 | 4-Methyl-2-oxopentanoate; 2-Oxoisocaproate                                                                       |
| 225.034 | C00279 | -1.72 | D-Erythrose 4-phosphate                                                                                          |
| 225.965 | C00160 | -4.17 | Glycolate; Glycolic acid; Hydroxyacetic acid                                                                     |
| 225.998 | C04409 | -2.29 | 2-Amino-3-carboxymuconate semialdehyde; 2-Amino-3-(3-oxoprop-1-enyl)-but-2-enedioate                             |
| 225.998 | C04409 | -2.32 | 2-Amino-3-carboxymuconate semialdehyde; 2-Amino-3-(3-oxoprop-1-enyl)-but-2-enedioate                             |
| 225.998 | C04409 | -2.56 | 2-Amino-3-carboxymuconate semialdehyde; 2-Amino-3-(3-oxoprop-1-enyl)-but-2-enedioate                             |
| 226.042 | C00279 | -2.26 | D-Erythrose 4-phosphate                                                                                          |
| 226.07  | C00956 | -2.33 | L-2-Amino adipate; L-alpha-Amino adipate; L-alpha-Amino adipic acid; L-2-Amino adipic acid                       |
| 226.951 | C00197 | -2.24 | 3-Phospho-D-glycerate; D-Glycerate 3-phosphate; 3-Phospho-(R)-glycerate; 3-Phosphoglycerate                      |
| 227.100 | C00931 | -2.95 | Porphobilinogen                                                                                                  |
| 227.176 | C05298 | -3.41 | 2-Hydroxyestrone                                                                                                 |
| 227.234 | C00233 | -2.14 | 4-Methyl-2-oxopentanoate; 2-Oxoisocaproate                                                                       |
| 227.954 | C00197 | -1.96 | 3-Phospho-D-glycerate; D-Glycerate 3-phosphate; 3-Phospho-(R)-glycerate; 3-Phosphoglycerate                      |
| 228.023 | C00624 | -3.24 | N-Acetyl-L-glutamate; N-Acetyl-L-glutamic acid                                                                   |
| 228.023 | C02470 | -1.81 | Xanthurenic acid; Xanthurenate                                                                                   |
| 228.023 | C03287 | -3.32 | L-Glutamyl 5-phosphate; L-Glutamate 5-phosphate                                                                  |
| 228.082 | C00642 | -1.83 | 4-Hydroxyphenylacetate; 4-Hydroxyphenylacetic acid                                                               |
| 228.102 | C00499 | -2.55 | Allantoate; Allantoic acid                                                                                       |
| 228.127 | C00612 | -1.99 | N1-Acetylspermidine                                                                                              |
| 228.173 | C05141 | -3.51 | Estriol; 1,3,5(10)-Estratriene-3,16-alpha,17beta-triol                                                           |
| 228.955 | C00119 | -1.69 | 5-Phospho-alpha-D-ribose 1-diphosphate; 5-Phosphoribosyl diphosphate; 5-Phosphoribosyl 1-pyrophosphate; PRPP     |
| 229.029 | C00624 | -3.02 | N-Acetyl-L-glutamate; N-Acetyl-L-glutamic acid                                                                   |
| 229.029 | C00624 | -3.03 | N-Acetyl-L-glutamate; N-Acetyl-L-glutamic acid                                                                   |
| 229.029 | C03287 | -2.95 | L-Glutamyl 5-phosphate; L-Glutamate 5-phosphate                                                                  |
| 229.98  | C05379 | -2.13 | Oxalosuccinate; Oxalosuccinic acid                                                                               |
| 230.033 | C00624 | -2.86 | N-Acetyl-L-glutamate; N-Acetyl-L-glutamic acid                                                                   |
| 230.033 | C00624 | -3.15 | N-Acetyl-L-glutamate; N-Acetyl-L-glutamic acid                                                                   |
| 230.033 | C03287 | -3.3  | L-Glutamyl 5-phosphate; L-Glutamate 5-phosphate                                                                  |
| 230.067 | C02972 | -1.7  | Dihydrolipoylprotein; [H protein]-dihydrolipoyllysine; [GCSH]-N6-[(R)-dihydrolipoyl]-L-lysine                    |
| 230.959 | C00279 | -2.54 | D-Erythrose 4-phosphate                                                                                          |
| 231.17  | C05642 | -2.57 | Formyl-N-acetyl-5-methoxykynurenine                                                                              |
| 232.054 | C03680 | -2.31 | 4-Imidazolone-5-propanoate; 4-Imidazolone-5-propionic acid; 4,5-Dihydro-4-oxo-5-imidazolepropanoate              |
| 232.129 | C06425 | -2.78 | Icosanoic acid; Eicosanoic acid; Arachidic acid                                                                  |
| 232.927 | C03232 | -2.45 | 3-Phosphonoxypropionate; 3-Phosphonoxypropionic acid; 3-Phosphohydroxypropionate                                 |
| 232.97  | C00785 | -2.16 | Urocanate; Urocanic acid                                                                                         |
| 233.151 | C00535 | -4.56 | Testosterone; 17beta-Hydroxy-4-androsten-3-one                                                                   |
| 234.026 | C02305 | -2.79 | Phosphocreatine; N-Phosphocreatine; Creatine phosphate                                                           |
| 234.151 | C05141 | -4.36 | Estriol; 1,3,5(10)-Estratriene-3,16-alpha,17beta-triol                                                           |
| 234.181 | C00931 | -2.22 | Porphobilinogen                                                                                                  |
| 235.129 | C00523 | -2.3  | Androsterone; 3alpha-Hydroxy-5alpha-androstan-17-one                                                             |
| 235.238 | C00410 | -7.79 | Progesterone; 4-Pregnene-3,20-dione                                                                              |
| 236.041 | C00233 | -1.89 | 4-Methyl-2-oxopentanoate; 2-Oxoisocaproate                                                                       |
| 236.13  | C00931 | -1.82 | Porphobilinogen                                                                                                  |
| 236.998 | C03406 | -2.28 | N-(L-Arginino)succinate; 2-(Nomega-L-Arginino)succinate; L-Argininosuccinate; L-Argininosuccinic acid            |
| 237.181 | C00931 | -2.29 | Porphobilinogen                                                                                                  |
| 238.079 | C00931 | -2.09 | Porphobilinogen                                                                                                  |
| 238.148 | C01598 | -2.71 | Melatonin; N-Acetyl-5-methoxytryptamine                                                                          |
| 238.971 | C00160 | -1.93 | Glycolate; Glycolic acid; Hydroxyacetic acid                                                                     |
| 238.993 | C01061 | -1.66 | 4-Fumarylacetoacetate; 4-Fumarylacetoacetic acid; Fumarylacetoacetate                                            |
| 239.194 | C05648 | -2.29 | 5-Hydroxy-N-formylkynurenine; 5-Hydroxy-N-formyl-L-kynurenine                                                    |
| 239.968 | C00279 | -2.48 | D-Erythrose 4-phosphate                                                                                          |
| 239.994 | C01036 | -2.07 | 4-Maleylacetoacetate; 4-Maleylacetoacetic acid                                                                   |
| 240.053 | C06114 | -3.43 | gamma-Glutamyl-beta-aminopropionitrile; gamma-Glutamyl-3-aminopropionitrile                                      |
| 240.053 | C06114 | -3.53 | gamma-Glutamyl-beta-aminopropionitrile; gamma-Glutamyl-3-aminopropionitrile                                      |
| 240.065 | C06114 | -2.25 | gamma-Glutamyl-beta-aminopropionitrile; gamma-Glutamyl-3-aminopropionitrile                                      |
| 240.065 | C06114 | -2.42 | gamma-Glutamyl-beta-aminopropionitrile; gamma-Glutamyl-3-aminopropionitrile                                      |
| 240.909 | C03232 | -1.97 | 3-Phosphonoxypropionate; 3-Phosphonoxypropionic acid; 3-Phosphohydroxypropionate                                 |
| 240.966 | C00279 | -2.89 | D-Erythrose 4-phosphate                                                                                          |
| 241.029 | C00049 | -2.25 | L-Aspartate; L-Aspartic acid; 2-Aminosuccinic acid; L-Asp                                                        |
| 241.105 | C01598 | -2.33 | Melatonin; N-Acetyl-5-methoxytryptamine                                                                          |
| 241.97  | C03974 | -1.82 | 2-Acyl-sn-glycerol 3-phosphate                                                                                   |
| 242.138 | C05341 | -1.81 | beta-Alanyl-L-lysine                                                                                             |
| 243.153 | C00468 | -2.23 | Estrone; 3-Hydroxy-1,3,5(10)-estratrien-17-one                                                                   |
| 243.233 | C00064 | -1.65 | L-Glutamine; L-2-Aminoglutaramic acid                                                                            |
| 243.973 | C00168 | -3.09 | Hydroxypropionate; Hydroxypropionic acid; 3-Hydroxypropionate; 3-Hydroxypropionic acid                           |
| 245.048 | C05382 | -2.17 | Sedoheptulose 7-phosphate; D-Sedoheptulose 7-phosphate; D-alto-Heptulose 7-phosphate                             |

|         |        |       |                                                                                                                |
|---------|--------|-------|----------------------------------------------------------------------------------------------------------------|
| 246.024 | C02051 | -2.13 | Lipoylprotein; H-Protein-lipoyllysine; [GCSH]-N6-lipoyl-L-lysine; [GcvH]-N6-lipoyl-L-lysine                    |
| 246.024 | C02051 | -2.13 | Lipoylprotein; H-Protein-lipoyllysine; [GCSH]-N6-lipoyl-L-lysine; [GcvH]-N6-lipoyl-L-lysine                    |
| 247.167 | C00523 | -3.79 | Androsterone; 3alpha-Hydroxy-5alpha-androstan-17-one                                                           |
| 247.983 | C00062 | -2.44 | L-Arginine; (S)-2-Amino-5-guanidinovaleric acid; L-Arg                                                         |
| 248.042 | C00931 | -2.66 | Porphobilinogen                                                                                                |
| 248.054 | C06114 | -1.92 | gamma-Glutamyl-beta-aminopropionitrile; gamma-Glutamyl-3-aminopropionitrile                                    |
| 248.067 | C00881 | -2.47 | Deoxycytidine; 2'-Deoxycytidine                                                                                |
| 249.045 | C17755 | -2.77 | Dopamine quinone                                                                                               |
| 249.918 | C00168 | -3.48 | Hydroxypyruvate; Hydroxypyruvic acid; 3-Hydroxypyruvate; 3-Hydroxypyruvic acid                                 |
| 249.998 | C02305 | -1.85 | Phosphocreatine; N-Phosphocreatine; Creatine phosphate                                                         |
| 250.112 | C00750 | -2.5  | Spermine; N,N'-Bis(3-aminopropyl)-1,4-butanediamine                                                            |
| 250.146 | C01598 | -2.54 | Melatonin; N-Acetyl-5-methoxytryptamine                                                                        |
| 250.178 | C02166 | -2.57 | Leukotriene C4; LTC4                                                                                           |
| 250.938 | C03232 | -2.16 | 3-Phosphonoxypropylpyruvate; 3-Phosphonoxypropionic acid; 3-Phosphohydroxypyruvate                             |
| 250.993 | C02305 | -3.32 | Phosphocreatine; N-Phosphocreatine; Creatine phosphate                                                         |
| 251.086 | C02055 | -1.68 | N-Acylglycine                                                                                                  |
| 251.125 | C01598 | -2.51 | Melatonin; N-Acetyl-5-methoxytryptamine                                                                        |
| 251.178 | C05692 | -1.93 | Se-Adenosyl-L-selenohomocysteine; Se-Adenosylselenohomocysteine                                                |
| 251.235 | C00931 | -2.13 | Porphobilinogen                                                                                                |
| 252.125 | C00931 | -1.78 | Porphobilinogen                                                                                                |
| 253.01  | C00117 | -2.74 | D-Ribose 5-phosphate; Ribose 5-phosphate                                                                       |
| 253.01  | C00199 | -2.36 | D-Ribulose 5-phosphate                                                                                         |
| 253.01  | C00231 | -1.69 | D-Xylulose 5-phosphate                                                                                         |
| 253.01  | C00620 | -2.67 | alpha-D-Ribose 1-phosphate; Ribose 1-phosphate; D-Ribose 1-phosphate                                           |
| 253.053 | C00337 | -2.21 | (S)-Dihydroorotate; (S)-4,5-Dihydroorotate; L-Dihydroorotate; L-Dihydroorotic acid; Dihydro-L-orotic acid      |
| 253.178 | C00931 | -1.9  | Porphobilinogen                                                                                                |
| 254.007 | C00166 | -1.76 | Phenylpyruvate; Phenylpyruvic acid; alpha-Ketohydrocinnamic acid; keto-Phenylpyruvate                          |
| 254.962 | C03680 | -2.74 | 4-Imidazolone-5-propanoate; 4-Imidazolone-5-propionic acid; 4,5-Dihydro-4-oxo-5-imidazolepropanoate            |
| 254.993 | C00122 | -1.8  | Fumarate; Fumaric acid; trans-Butenedioic acid                                                                 |
| 255.06  | C05576 | -2.13 | 3,4-Dihydroxyphenylethyleneglycol                                                                              |
| 255.115 | C01598 | -2.62 | Melatonin; N-Acetyl-5-methoxytryptamine                                                                        |
| 256.021 | C00049 | -2.2  | L-Aspartate; L-Aspartic acid; 2-Aminosuccinic acid; L-Asp                                                      |
| 257.055 | C00064 | -1.94 | L-Glutamine; L-2-Aminoglutaric acid                                                                            |
| 257.139 | C00468 | -2.35 | Estrone; 3-Hydroxy-1,3,5(10)-estratrien-17-one                                                                 |
| 257.15  | C13713 | -2.12 | Allotetrahydrodeoxycorticosterone; 5alpha-THDOC; 3alpha,21-Dihydroxy-5alpha-pregnan-20-one                     |
| 258.001 | C01036 | -2.04 | 4-Maleylacetoacetate; 4-Maleylacetoacetic acid                                                                 |
| 258.149 | C00931 | -1.92 | Porphobilinogen                                                                                                |
| 258.981 | C00363 | -3.38 | dTDP; Deoxythymidine 5'-diphosphate                                                                            |
| 259.025 | C01236 | -2.93 | D-Glucono-1,5-lactone 6-phosphate; 6-Phospho-D-glucono-1,5-lactone                                             |
| 259.119 | C01598 | -2.79 | Melatonin; N-Acetyl-5-methoxytryptamine                                                                        |
| 259.165 | C05138 | -2.71 | 17alpha-Hydroxypregnenolone                                                                                    |
| 260.05  | C00352 | -2.77 | D-Glucosamine 6-phosphate; D-Glucosamine phosphate                                                             |
| 260.094 | C01242 | -2.67 | [Protein]-58-aminomethyldihydrolypoyllysine; H-protein-S-aminomethyldihydrolypoyllysine                        |
| 260.949 | C00117 | -2.49 | D-Ribose 5-phosphate; Ribose 5-phosphate                                                                       |
| 261.01  | C00031 | -2.16 | D-Glucose; Grape sugar; Dextrose; Glucose; D-Glucopyranose                                                     |
| 261.046 | C00352 | -2.87 | D-Glucosamine 6-phosphate; D-Glucosamine phosphate                                                             |
| 261.046 | C00645 | -2.31 | N-Acetyl-D-mannosamine; 2-Acetamido-2-deoxy-D-mannose                                                          |
| 261.046 | C01132 | -2.28 | N-Acetyl-D-galactosamine; N-Acetyl-D-chondrosamine; 2-Acetamido-2-deoxy-D-galactose                            |
| 261.074 | C01239 | -1.68 | N-Acetyl-beta-D-glucosaminylamine                                                                              |
| 262.003 | C00074 | -2.53 | Phosphoenolpyruvate; Phosphoenolpyruvic acid; PEP                                                              |
| 262.055 | C00140 | -2.51 | N-Acetyl-D-glucosamine; N-Acetylchitosamine; 2-Acetamido-2-deoxy-D-glucose; GlcNAc                             |
| 262.055 | C00140 | -2.76 | N-Acetyl-D-glucosamine; N-Acetylchitosamine; 2-Acetamido-2-deoxy-D-glucose; GlcNAc                             |
| 262.055 | C00352 | -3.22 | D-Glucosamine 6-phosphate; D-Glucosamine phosphate                                                             |
| 262.055 | C00645 | -2.88 | N-Acetyl-D-mannosamine; 2-Acetamido-2-deoxy-D-mannose                                                          |
| 262.055 | C00645 | -3.1  | N-Acetyl-D-mannosamine; 2-Acetamido-2-deoxy-D-mannose                                                          |
| 262.055 | C01132 | -2.84 | N-Acetyl-D-galactosamine; N-Acetyl-D-chondrosamine; 2-Acetamido-2-deoxy-D-galactose                            |
| 262.055 | C01132 | -3.17 | N-Acetyl-D-galactosamine; N-Acetyl-D-chondrosamine; 2-Acetamido-2-deoxy-D-galactose                            |
| 262.992 | C00785 | -1.69 | Urocanate; Urocanic acid                                                                                       |
| 263.127 | C05642 | -1.73 | Formyl-N-acetyl-5-methoxykynurenine                                                                            |
| 263.952 | C15650 | -2.4  | 2,3-Diketo-5-methylthiopentyl-1-phosphate; 5-(Methylthio)-2,3-dioxopentyl phosphate                            |
| 263.993 | C03372 | -2.04 | Acyglycerone phosphate; Dihydroxyacetone phosphate acyl ester; 1-Acyl-glycerone 3-phosphate                    |
| 264.023 | C05648 | -1.85 | 5-Hydroxy-N-formylkynurenine; 5-Hydroxy-N-formyl-L-kynurenine                                                  |
| 264.116 | C00612 | -4.14 | N1-Acetylspermidine                                                                                            |
| 264.124 | C05648 | -1.84 | 5-Hydroxy-N-formylkynurenine; 5-Hydroxy-N-formyl-L-kynurenine                                                  |
| 264.159 | C05648 | -2.34 | 5-Hydroxy-N-formylkynurenine; 5-Hydroxy-N-formyl-L-kynurenine                                                  |
| 264.238 | C00517 | -2.16 | Hexadecanal; Palmitaldehyde                                                                                    |
| 265.023 | C00785 | -2.06 | Urocanate; Urocanic acid                                                                                       |
| 265.101 | C01598 | -2.27 | Melatonin; N-Acetyl-5-methoxytryptamine                                                                        |
| 265.165 | C06425 | -2.49 | Icosanoic acid; Eicosanoic acid; Arachidic acid                                                                |
| 265.97  | C15650 | -2.22 | 2,3-Diketo-5-methylthiopentyl-1-phosphate; 5-(Methylthio)-2,3-dioxopentyl phosphate                            |
| 266.027 | C03508 | -2.23 | L-2-Amino-3-oxobutanoic acid; L-2-Amino-3-oxobutanoate; L-2-Amino-acetoacetate; (S)-2-Amino-3-oxobutanoic acid |
| 266.062 | C05130 | -2.35 | Imidazole-4-acetaldehyde; Imidazole acetaldehyde                                                               |
| 266.077 | C05711 | -4.37 | gamma-Glutamyl-beta-cyanoalanine                                                                               |
| 266.142 | C01598 | -3.49 | Melatonin; N-Acetyl-5-methoxytryptamine                                                                        |
| 266.971 | C00236 | -2.47 | 3-Phospho-D-glycerol phosphate; 1,3-Bisphospho-D-glycerate                                                     |
| 266.971 | C01159 | -3.12 | 2,3-Bisphospho-D-glycerate; 2,3-Disphospho-D-glycerate; D-Greenwald ester; DPG                                 |
| 267.000 | C00166 | -3.48 | Phenylpyruvate; Phenylpyruvic acid; alpha-Ketohydrocinnamic acid; keto-Phenylpyruvate                          |
| 268.104 | C00330 | -2.94 | Deoxyguanosine; 2'-Deoxyguanosine                                                                              |
| 268.184 | C00735 | -5.8  | Cortisol; Hydrocortisone; 11beta,17alpha,21-Trihydroxy-4-pregnene-3,20-dione; Kendall's compound F             |
| 268.949 | C03508 | -1.65 | L-2-Amino-3-oxobutanoic acid; L-2-Amino-3-oxobutanoate; L-2-Amino-acetoacetate; (S)-2-Amino-3-oxobutanoic acid |
| 270.046 | C00049 | -2.04 | L-Aspartate; L-Aspartic acid; 2-Aminosuccinic acid; L-Asp                                                      |
| 270.187 | C00735 | -2.85 | Cortisol; Hydrocortisone; 11beta,17alpha,21-Trihydroxy-4-pregnene-3,20-dione; Kendall's compound F             |
| 270.977 | C00117 | -3.73 | D-Ribose 5-phosphate; Ribose 5-phosphate                                                                       |



|         |        |       |                                                                                                                       |
|---------|--------|-------|-----------------------------------------------------------------------------------------------------------------------|
| 270.977 | C00199 | -4.43 | D-Ribulose 5-phosphate                                                                                                |
| 270.977 | C00231 | -3.76 | D-Xylulose 5-phosphate                                                                                                |
| 270.977 | C00620 | -3.7  | alpha-D-Ribose 1-phosphate; Ribose 1-phosphate; D-Ribose 1-phosphate                                                  |
| 271.088 | C01598 | -1.69 | Melatonin; N-Acetyl-5-methoxytryptamine                                                                               |
| 271.151 | C00062 | -1.95 | L-Arginine; (S)-2-Amino-5-guanidinovaleric acid; L-Arg                                                                |
| 271.188 | C00468 | -1.71 | Estrone; 3-Hydroxy-1,3,5(10)-estratrien-17-one                                                                        |
| 272.083 | C01598 | -1.98 | Melatonin; N-Acetyl-5-methoxytryptamine                                                                               |
| 272.13  | C00931 | -2.24 | Porphobilinogen                                                                                                       |
| 272.981 | C00468 | -2.12 | Estrone; 3-Hydroxy-1,3,5(10)-estratrien-17-one                                                                        |
| 273.074 | C05642 | -2.51 | Formyl-N-acetyl-5-methoxykynurenamine                                                                                 |
| 273.133 | C00468 | -1.9  | Estrone; 3-Hydroxy-1,3,5(10)-estratrien-17-one                                                                        |
| 273.22  | C00523 | -2.83 | Androsterone; 3alpha-Hydroxy-5alpha-androstan-17-one                                                                  |
| 273.257 | C00535 | -5.87 | Testosterone; 17beta-Hydroxy-4-androsten-3-one                                                                        |
| 273.954 | C03232 | -3.18 | 3-Phosphonoxypropionate; 3-Phosphonoxypropionic acid; 3-Phosphohydroxypropionate                                      |
| 274.171 | C00931 | -2.2  | Porphobilinogen                                                                                                       |
| 274.877 | C00197 | -1.93 | 3-Phospho-D-glycerate; D-Glycerate 3-phosphate; 3-Phospho-(R)-glycerate; 3-Phosphoglycerate                           |
| 275.056 | C05141 | -2.71 | Estriol; 1,3,5(10)-Estratriene-3,16-alpha,17beta-triol                                                                |
| 275.084 | C05298 | -1.73 | 2-Hydroxyestrone                                                                                                      |
| 275.152 | C00931 | -2    | Porphobilinogen                                                                                                       |
| 275.236 | C00535 | -4.41 | Testosterone; 17beta-Hydroxy-4-androsten-3-one                                                                        |
| 276.266 | C00062 | -2.98 | L-Arginine; (S)-2-Amino-5-guanidinovaleric acid; L-Arg                                                                |
| 276.919 | C00117 | -3.23 | D-Ribose 5-phosphate; Ribose 5-phosphate                                                                              |
| 277.175 | C05648 | -1.97 | 5-Hydroxy-N-formylkynurenine; 5-Hydroxy-N-formyl-L-kynurenine                                                         |
| 279.231 | C00249 | -2.92 | Hexadecanoic acid; Hexadecanoate; Hexadecylic acid; Palmitic acid; Cetyllic acid                                      |
| 279.231 | C06426 | -2.99 | (6Z,9Z,12Z)-Octadecatrienoic acid; 6,9,12-Octadecatrienoic acid; gamma-Linolenic acid; Gamolenic acid                 |
| 279.231 | C06427 | -3.96 | (9Z,12Z,15Z)-Octadecatrienoic acid; alpha-Linolenic acid; 9,12,15-Octadecatrienoic acid; Linolenate; alpha-Linolenate |
| 279.97  | C00294 | -1.74 | Inosine                                                                                                               |
| 280.09  | C00884 | -3.09 | Homocarnosine; L-Homocarnosine; gamma-Aminobutyryl histidine; N-(4-Amino-1-oxobutyl)histidine                         |
| 280.09  | C00884 | -3.47 | Homocarnosine; L-Homocarnosine; gamma-Aminobutyryl histidine; N-(4-Amino-1-oxobutyl)histidine                         |
| 280.09  | C01262 | -2.2  | beta-Alanyl-N(pi)-methyl-L-histidine; Anserine                                                                        |
| 280.09  | C01262 | -2.34 | beta-Alanyl-N(pi)-methyl-L-histidine; Anserine                                                                        |
| 280.116 | C15977 | -1.69 | [Dihydrolypoyllysine-residue (2-methylpropanoyl)transferase] S-(2-methylpropanoyl)dihydrolypoyllysine                 |
| 280.19  | C05141 | -2.5  | Estriol; 1,3,5(10)-Estratriene-3,16-alpha,17beta-triol                                                                |
| 280.231 | C06427 | -1.9  | (9Z,12Z,15Z)-Octadecatrienoic acid; alpha-Linolenic acid; 9,12,15-Octadecatrienoic acid; Linolenate; alpha-Linolenate |
| 280.962 | C15650 | -1.77 | 2,3-Diketo-5-methylthiopentyl-1-phosphate; 5-(Methylthio)-2,3-dioxopentyl phosphate                                   |
| 280.962 | C15651 | -1.77 | 2-Hydroxy-3-keto-5-methylthiopentyl-1-phosphate; 2-Hydroxy-5-(methylthio)-3-oxopent-1-enyl phosphate                  |
| 280.971 | C00581 | -1.81 | Guanidinoacetate; Guanidinoacetic acid; Glycocyamine; N-Amidinoglycine; Guanidoacetic acid                            |
| 281.008 | C00160 | -2.9  | Glycolate; Glycolic acid; Hydroxyacetic acid                                                                          |
| 281.094 | C01262 | -1.85 | beta-Alanyl-N(pi)-methyl-L-histidine; Anserine                                                                        |
| 281.094 | C01262 | -1.96 | beta-Alanyl-N(pi)-methyl-L-histidine; Anserine                                                                        |
| 281.151 | C00951 | -3.3  | Estradiol-17beta; Estradiol; beta-Estradiol                                                                           |
| 281.206 | C05141 | -3.14 | Estriol; 1,3,5(10)-Estratriene-3,16-alpha,17beta-triol                                                                |
| 281.987 | C04299 | -1.95 | D-myo-Inositol 1,2-cyclic phosphate; 1D-myo-Inositol 1,2-cyclic phosphate                                             |
| 282.048 | C05711 | -3.11 | gamma-Glutamyl-beta-cyanoalanine                                                                                      |
| 282.096 | C05642 | -2.33 | Formyl-N-acetyl-5-methoxykynurenamine                                                                                 |
| 282.15  | C05141 | -3.76 | Estriol; 1,3,5(10)-Estratriene-3,16-alpha,17beta-triol                                                                |
| 282.218 | C05475 | -2.47 | 11beta,21-Dihydroxy-5beta-pregnane-3,20-dione; 5beta-Pregnane-11beta,21-diol-3,20-dione                               |
| 283.033 | C03508 | -2.46 | L-2-Amino-3-oxobutanoic acid; L-2-Amino-3-oxobutanoate; L-2-Amino-acetoacetate; (S)-2-Amino-3-oxobutanoic acid        |
| 283.117 | C00062 | -2.82 | L-Arginine; (S)-2-Amino-5-guanidinovaleric acid; L-Arg                                                                |
| 283.145 | C05761 | -1.67 | Tetradecanoyl-[acp]; Tetradecanoyl-[acyl-carrier protein]; Myristoyl-[acyl-carrier protein]                           |
| 283.171 | C02140 | -4.98 | Corticosterone; 11beta,21-Dihydroxy-4-pregnene-3,20-dione; Kendall's compound B; Reichstein's substance H             |
| 283.204 | C05141 | -2.88 | Estriol; 1,3,5(10)-Estratriene-3,16-alpha,17beta-triol                                                                |
| 283.222 | C00468 | -3    | Estrone; 3-Hydroxy-1,3,5(10)-estratrien-17-one                                                                        |
| 283.957 | C15650 | -2.26 | 2,3-Diketo-5-methylthiopentyl-1-phosphate; 5-(Methylthio)-2,3-dioxopentyl phosphate                                   |
| 283.957 | C15651 | -2.2  | 2-Hydroxy-3-keto-5-methylthiopentyl-1-phosphate; 2-Hydroxy-5-(methylthio)-3-oxopent-1-enyl phosphate                  |
| 283.977 | C00279 | -2.03 | D-Erythrose 4-phosphate                                                                                               |
| 284.206 | C05141 | -4.2  | Estriol; 1,3,5(10)-Estratriene-3,16-alpha,17beta-triol                                                                |
| 284.909 | C00279 | -3.25 | D-Erythrose 4-phosphate                                                                                               |
| 285.22  | C00535 | -2.85 | Testosterone; 17beta-Hydroxy-4-androsten-3-one                                                                        |
| 285.241 | C00378 | -2.08 | Thiamine; Thiamin; Vitamin B1; Aneurin; Antiberiberi factor                                                           |
| 285.296 | C06425 | -1.87 | Icosanoic acid; Eicosanoic acid; Arachidic acid                                                                       |
| 286.07  | C01762 | -2.12 | Xanthosine                                                                                                            |
| 286.106 | C05340 | -2.08 | beta-Alanyl-L-arginine                                                                                                |
| 286.222 | C00535 | -2.56 | Testosterone; 17beta-Hydroxy-4-androsten-3-one                                                                        |
| 286.25  | C05139 | -4.75 | 16alpha-Hydroxydehydroepiandrosterone; 5-Androstene-3beta,16alpha-diol-17-one                                         |
| 287.176 | C00931 | -2.19 | Porphobilinogen                                                                                                       |
| 287.196 | C00280 | -3.52 | Androstenedione; Androst-4-ene-3,17-dione; 4-Androstene-3,17-dione                                                    |
| 287.236 | C00535 | -4.6  | Testosterone; 17beta-Hydroxy-4-androsten-3-one                                                                        |
| 288.104 | C00378 | -1.77 | Thiamine; Thiamin; Vitamin B1; Aneurin; Antiberiberi factor                                                           |
| 288.104 | C05642 | -1.92 | Formyl-N-acetyl-5-methoxykynurenamine                                                                                 |
| 288.177 | C05642 | -2.65 | Formyl-N-acetyl-5-methoxykynurenamine                                                                                 |
| 288.239 | C00535 | -3.27 | Testosterone; 17beta-Hydroxy-4-androsten-3-one                                                                        |
| 289.1   | C05642 | -2.11 | Formyl-N-acetyl-5-methoxykynurenamine                                                                                 |
| 289.174 | C00523 | -4.47 | Androsterone; 3alpha-Hydroxy-5alpha-androstan-17-one                                                                  |
| 289.214 | C00535 | -3.23 | Testosterone; 17beta-Hydroxy-4-androsten-3-one                                                                        |
| 289.214 | C00674 | -4.01 | 5alpha-Androstane-3,17-dione; Androstenedione                                                                         |
| 289.214 | C01227 | -3.38 | Dehydroepiandrosterone; 3beta-Hydroxyandrost-5-en-17-one; Dehydroisoandrosterone; DHA; DHEA                           |
| 289.214 | C03772 | -4.06 | 5beta-Androstane-3,17-dione                                                                                           |
| 289.251 | C00535 | -3.94 | Testosterone; 17beta-Hydroxy-4-androsten-3-one                                                                        |
| 290.213 | C00735 | -4.43 | Cortisol; Hydrocortisone; 11beta,17alpha,21-Trihydroxy-4-pregnene-3,20-dione; Kendall's compound F                    |
| 290.255 | C00535 | -4.07 | Testosterone; 17beta-Hydroxy-4-androsten-3-one                                                                        |
| 290.886 | C00168 | -1.69 | Hydroxypyruvate; Hydroxypyruvic acid; 3-Hydroxypyruvate; 3-Hydroxypyruvic acid                                        |
| 291.013 | C03508 | -2.25 | L-2-Amino-3-oxobutanoic acid; L-2-Amino-3-oxobutanoate; L-2-Amino-acetoacetate; (S)-2-Amino-3-oxobutanoic acid        |

|         |        |       |                                                                                                                       |
|---------|--------|-------|-----------------------------------------------------------------------------------------------------------------------|
| 291.084 | C00330 | -1.7  | Deoxyguanosine; 2'-Deoxyguanosine                                                                                     |
| 291.14  | C00108 | -2.19 | Anthranilate; Anthranilic acid; o-Aminobenzoic acid; Vitamin L1; 2-Aminobenzoate                                      |
| 291.192 | C02165 | -2.67 | Leukotriene B <sub>4</sub> ; (6Z,8E,10E,14Z)-(5S,12R)-5,12-Dihydroxyeicosa-6,8,10,14-tetraenoate                      |
| 291.23  | C00523 | -4.12 | Androsterone; 3alpha-Hydroxy-5alpha-androstan-17-one                                                                  |
| 291.23  | C03917 | -4.59 | Dihydrotestosterone; 17beta-Hydroxyandrostan-3-one; Androstanolone; 17beta-Hydroxy-5alpha-androstan-3-one             |
| 291.23  | C04295 | -4    | Androstenediol; Androst-5-ene-3beta,17beta-diol; 3beta,17beta-Dihydroxyandrost-5-ene                                  |
| 291.23  | C04373 | -3.34 | Etiocholanolone; 3alpha-Hydroxy-5beta-androstan-17-one; Etiocholan-3alpha-ol-17-one                                   |
| 291.23  | C05293 | -4.11 | 5beta-Dihydrotestosterone                                                                                             |
| 291.267 | C00535 | -4.18 | Testosterone; 17beta-Hydroxy-4-androsten-3-one                                                                        |
| 292.014 | C00640 | -2.44 | (3S)-3-Hydroxyacyl-CoA; (S)-3-Hydroxyacyl-CoA                                                                         |
| 292.042 | C05512 | -2.76 | Deoxyinosine                                                                                                          |
| 292.051 | C05382 | -1.84 | Sedoheptulose 7-phosphate; D-Sedoheptulose 7-phosphate; D-altro-Heptulose 7-phosphate                                 |
| 292.051 | C05512 | -2.46 | Deoxyinosine                                                                                                          |
| 292.051 | C05512 | -2.49 | Deoxyinosine                                                                                                          |
| 292.051 | C05512 | -2.62 | Deoxyinosine                                                                                                          |
| 292.107 | C06114 | -2.12 | gamma-Glutamyl-beta-aminopropionitrile; gamma-Glutamyl-3-aminopropionitrile                                           |
| 292.197 | C00909 | -2.09 | Leukotriene A <sub>4</sub> ; LTA <sub>4</sub> ; (7E,9E,11Z,14Z)-(5S,6S)-5,6-Epoxyeicosa-7,9,11,14-tetraenoic acid     |
| 292.226 | C04707 | -4.08 | (5Z,13E)-11alpha-Hydroxy-9,15-dioxoprost-13-enoate; (5Z)-(15S)-11alpha-Hydroxy-9,15-dioxoprost-13-enoate              |
| 292.884 | C00168 | -2.09 | Hydroxypyruvate; Hydroxypyruvic acid; 3-Hydroxypyruvate; 3-Hydroxypyruvic acid                                        |
| 293.012 | C00279 | -2.51 | D-Erythrose 4-phosphate                                                                                               |
| 293.068 | C02763 | -3    | 2-Hydroxy-3-phenylpropenoate; enol-Phenylpyruvate; enol-Phenylpyruvic acid; enol-alpha-Ketohydrocinnamic acid         |
| 293.097 | C03406 | -2.18 | N-(L-Arginino)succinate; 2-(Nomega-L-Arginino)succinate; L-Argininosuccinate; L-Argininosuccinic acid                 |
| 293.176 | C05141 | -4.59 | Estriol; 1,3,5(10)-Estratriene-3,16-alpha,17beta-triol                                                                |
| 293.244 | C03852 | -2.67 | Androstan-3alpha,17beta-diol; 5alpha-Androstan-3alpha,17beta-diol                                                     |
| 294.07  | C00559 | -2.11 | Deoxyadenosine; 2'-Deoxyadenosine                                                                                     |
| 294.101 | C00655 | -2.02 | Xanthosine 5'-phosphate; Xanthylic acid; XMP; (9-D-Ribosylxanthine)-5'-phosphate                                      |
| 294.185 | C05141 | -3.88 | Estriol; 1,3,5(10)-Estratriene-3,16-alpha,17beta-triol                                                                |
| 294.213 | C00249 | -1.87 | Hexadecanoic acid; Hexadecanoate; Hexadecylic acid; Palmitic acid; Palmitate; Cetylic acid                            |
| 295.127 | C05141 | -4.66 | Estriol; 1,3,5(10)-Estratriene-3,16-alpha,17beta-triol                                                                |
| 295.165 | C00951 | -4.05 | Estradiol-17beta; Estradiol; beta-Estradiol                                                                           |
| 295.259 | C05699 | -1.8  | L-Selenocystathionine                                                                                                 |
| 296.184 | C06425 | -1.79 | Icosanoic acid; Eicosanoic acid; Arachidic acid                                                                       |
| 296.257 | C06427 | -2.81 | (9Z,12Z,15Z)-Octadecatrienoic acid; alpha-Linolenic acid; 9,12,15-Octadecatrienoic acid; Linolenate; alpha-Linolenate |
| 296.919 | C03508 | -1.85 | L-2-Amino-3-oxobutanoic acid; L-2-Amino-3-oxobutanoate; L-2-Amino-acetoacetate; (S)-2-Amino-3-oxobutanoic acid        |
| 297.12  | C04688 | -1.65 | (3R)-3-Hydroxytetradecanoyl-[acyl-carrier protein]; (R)-3-Hydroxytetradecanoyl-[acyl-carrier protein]                 |
| 297.179 | C00535 | -3.71 | Testosterone; 17beta-Hydroxy-4-androsten-3-one                                                                        |
| 297.219 | C05141 | -2.7  | Estriol; 1,3,5(10)-Estratriene-3,16-alpha,17beta-triol                                                                |
| 297.239 | C05648 | -2.07 | 5-Hydroxy-N-formylkynurenine; 5-Hydroxy-N-formyl-L-kynurenine                                                         |
| 297.314 | C06425 | -2.55 | Icosanoic acid; Eicosanoic acid; Arachidic acid                                                                       |
| 298.274 | C06425 | -1.85 | Icosanoic acid; Eicosanoic acid; Arachidic acid                                                                       |
| 299.083 | C00523 | -2.49 | Androsterone; 3alpha-Hydroxy-5alpha-androstan-17-one                                                                  |
| 300.004 | C05827 | -2.24 | Methylimidazole acetaldehyde; 1-Methylimidazole-4-acetaldehyde; Methylimidazoleacetaldehyde                           |
| 300.066 | C05642 | -3.59 | Formyl-N-acetyl-5-methoxykynurenamine                                                                                 |
| 300.135 | C00468 | -1.96 | Estrone; 3-Hydroxy-1,3,5(10)-estratrien-17-one                                                                        |
| 300.199 | C05141 | -2.96 | Estriol; 1,3,5(10)-Estratriene-3,16-alpha,17beta-triol                                                                |
| 300.289 | C00319 | -1.99 | Sphingosine; Sphingenine; Sphingoid; Sphing-4-enine                                                                   |
| 300.985 | C00279 | -1.97 | D-Erythrose 4-phosphate                                                                                               |
| 302.214 | C02140 | -8.65 | Corticosterone; 11beta,21-Dihydroxy-4-pregnene-3,20-dione; Kendall's compound B; Reichstein's substance H             |
| 303.03  | C05332 | -2.14 | Phenethylamine; 2-Phenylethylamine; beta-Phenylethylamine; Phenylethylamine                                           |
| 303.058 | C00357 | -2    | N-Acetyl-D-glucosamine 6-phosphate                                                                                    |
| 303.058 | C04257 | -2.11 | N-Acetyl-D-mannosamine 6-phosphate; N-Acetylmannosamine 6-phosphate                                                   |
| 303.081 | C05642 | -3.18 | Formyl-N-acetyl-5-methoxykynurenamine                                                                                 |
| 303.176 | C16677 | -2.34 | all-trans-4-Hydroxyretinoic acid                                                                                      |
| 303.301 | C00836 | -3.41 | Sphinganine; Dihydrosphingosine; 2-Amino-1,3-dihydroxyoctadecane                                                      |
| 305.11  | C00064 | -1.95 | L-Glutamine; L-2-Aminoglutaramic acid                                                                                 |
| 305.209 | C05139 | -3.31 | 16alpha-Hydroxydehydroepiandrosterone; 5-Androstene-3beta,16alpha-diol-17-one                                         |
| 305.209 | C05291 | -3.36 | 7alpha-Hydroxytestosterone                                                                                            |
| 305.209 | C05294 | -2.98 | 19-Hydroxytestosterone; 17beta,19-Dihydroxyandrost-4-en-3-one                                                         |
| 306.068 | C00130 | -2.52 | IMP; Inosinic acid; Inosine monophosphate; Inosine 5'-monophosphate; Inosine 5'-phosphate; 5'-Inosinate               |
| 306.128 | C00097 | -2.68 | L-Cysteine; L-2-Amino-3-mercaptopropionic acid                                                                        |
| 307.064 | C01762 | -2.45 | Xanthosine                                                                                                            |
| 307.113 | C00931 | -2.72 | Porphobilinogen                                                                                                       |
| 307.173 | C06425 | -2.66 | Icosanoic acid; Eicosanoic acid; Arachidic acid                                                                       |
| 307.201 | C00951 | -3.06 | Estradiol-17beta; Estradiol; beta-Estradiol                                                                           |
| 307.279 | C04707 | -3.61 | (5Z,13E)-11alpha-Hydroxy-9,15-dioxoprost-13-enoate; (5Z)-(15S)-11alpha-Hydroxy-9,15-dioxoprost-13-enoate              |
| 308.061 | C00239 | -2.26 | dCMP; Deoxycytidylic acid; Deoxycytidine monophosphate; Deoxycytidylate; 2'-Deoxycytidine 5'-monophosphate            |
| 308.061 | C01762 | -2.87 | Xanthosine                                                                                                            |
| 308.089 | C00051 | -1.74 | Glutathione; 5-L-Glutamyl-L-cysteinylglycine; N-(N-gamma-L-Glutamyl-L-cysteinyl)glycine                               |
| 308.089 | C02320 | -1.65 | R-S-Glutathione                                                                                                       |
| 308.147 | C13713 | -5.31 | Allotetrahydrodeoxycorticosterone; 5alpha-THDOC; 3alpha,21-Dihydroxy-5alpha-pregnan-20-one                            |
| 308.203 | C00376 | -1.86 | Retinal; Vitamin A aldehyde; Retinene; all-trans-Retinal; all-trans-Vitamin A aldehyde; all-trans-Retinene            |
| 308.221 | C00836 | -1.99 | Sphinganine; Dihydrosphingosine; 2-Amino-1,3-dihydroxyoctadecane                                                      |
| 308.954 | C00279 | -2.95 | D-Erythrose 4-phosphate                                                                                               |
| 309.051 | C00365 | -3.24 | dUMP; Deoxyuridylic acid; Deoxyuridine monophosphate; Deoxyuridine 5'-phosphate                                       |
| 309.13  | C05648 | -1.68 | 5-Hydroxy-N-formylkynurenine; 5-Hydroxy-N-formyl-L-kynurenine                                                         |
| 309.217 | C00410 | -4.86 | Progesterone; 4-Pregnene-3,20-dione                                                                                   |
| 310.166 | C05648 | -1.91 | 5-Hydroxy-N-formylkynurenine; 5-Hydroxy-N-formyl-L-kynurenine                                                         |
| 310.207 | C00410 | -3.37 | Progesterone; 4-Pregnene-3,20-dione                                                                                   |
| 310.222 | C00410 | -3.46 | Progesterone; 4-Pregnene-3,20-dione                                                                                   |
| 311.126 | C00468 | -1.73 | Estrone; 3-Hydroxy-1,3,5(10)-estratrien-17-one                                                                        |
| 311.126 | C00468 | -1.75 | Estrone; 3-Hydroxy-1,3,5(10)-estratrien-17-one                                                                        |
| 311.126 | C00468 | -1.84 | Estrone; 3-Hydroxy-1,3,5(10)-estratrien-17-one                                                                        |
| 311.161 | C02140 | -4.52 | Corticosterone; 11beta,21-Dihydroxy-4-pregnene-3,20-dione; Kendall's compound B; Reichstein's substance H             |

|         |        |       |                                                                                                                                          |
|---------|--------|-------|------------------------------------------------------------------------------------------------------------------------------------------|
| 311.161 | C05141 | -3.57 | Estriol; 1,3,5(10)-Estratriene-3,16- $\alpha$ ,17 $\beta$ -triol                                                                         |
| 311.161 | C05301 | -3.43 | 2-Hydroxyestradiol; 2-Hydroxyestradiol-17 $\beta$ ; 2-OH-Estradiol                                                                       |
| 311.195 | C00674 | -2.13 | 5 $\alpha$ -Androstane-3,17-dione; Androstanedione                                                                                       |
| 311.195 | C00674 | -2.39 | 5 $\alpha$ -Androstane-3,17-dione; Androstanedione                                                                                       |
| 311.195 | C01227 | -1.9  | Dehydroepiandrosterone; 3 $\beta$ -Hydroxyandrost-5-en-17-one; Dehydroisoandrosterone; DHA; DHEA                                         |
| 311.195 | C03772 | -2.3  | 5 $\beta$ -Androstane-3,17-dione                                                                                                         |
| 311.233 | C00951 | -2.59 | Estradiol-17 $\beta$ ; Estradiol; $\beta$ -Estradiol                                                                                     |
| 312.161 | C13713 | -2.85 | Allotetrahydrodeoxycorticosterone; 5 $\alpha$ -THDOC; 3 $\alpha$ ,21-Dihydroxy-5 $\alpha$ -pregnan-20-one                                |
| 312.197 | C00535 | -2.03 | Testosterone; 17 $\beta$ -Hydroxy-4-androsten-3-one                                                                                      |
| 312.197 | C00674 | -2.27 | 5 $\alpha$ -Androstane-3,17-dione; Androstanedione                                                                                       |
| 312.197 | C01227 | -1.89 | Dehydroepiandrosterone; 3 $\beta$ -Hydroxyandrost-5-en-17-one; Dehydroisoandrosterone; DHA; DHEA                                         |
| 312.197 | C03772 | -2.53 | 5 $\beta$ -Androstane-3,17-dione                                                                                                         |
| 312.238 | C00535 | -2.36 | Testosterone; 17 $\beta$ -Hydroxy-4-androsten-3-one                                                                                      |
| 312.889 | C04540 | -2.74 | N <sub>4</sub> -(Acetyl- $\beta$ -D-glucosaminyl)asparagine; N <sub>4</sub> -( $\beta$ -N-Acetyl-D-glucosaminyl)-L-asparagine            |
| 313.114 | C03406 | -1.88 | N-(L-Arginino)succinate; 2-(Nomega-L-Arginino)succinate; L-Argininosuccinate; L-Argininosuccinic acid                                    |
| 313.141 | C02140 | -3.14 | Corticosterone; 11 $\beta$ ,21-Dihydroxy-4-pregnene-3,20-dione; Kendall's compound B; Reichstein's substance H                           |
| 313.176 | C05141 | -1.95 | Estriol; 1,3,5(10)-Estratriene-3,16- $\alpha$ ,17 $\beta$ -triol                                                                         |
| 313.209 | C00523 | -2.56 | Androsterone; 3 $\alpha$ -Hydroxy-5 $\alpha$ -androstan-17-one                                                                           |
| 313.209 | C03917 | -2.23 | Dihydrotestosterone; 17 $\beta$ -Hydroxyandrostan-3-one; Androstanolone; 17 $\beta$ -Hydroxy-5 $\alpha$ -androstan-3-one                 |
| 313.209 | C04295 | -2.09 | Androstenediol; Androst-5-ene-3 $\beta$ ,17 $\beta$ -diol; 3 $\beta$ ,17 $\beta$ -Dihydroxyandrost-5-ene; 3 $\beta$                      |
| 313.209 | C04373 | -2.68 | Etiocolanolone; 3 $\alpha$ -Hydroxy-5 $\beta$ -androstan-17-one; Etiocolan-3 $\alpha$ -ol-17-one                                         |
| 313.209 | C05293 | -1.96 | 5 $\beta$ -Dihydrotestosterone                                                                                                           |
| 313.31  | C06425 | -2.62 | Icosanoic acid; Eicosanoic acid; Arachidic acid                                                                                          |
| 313.31  | C06425 | -2.65 | Icosanoic acid; Eicosanoic acid; Arachidic acid                                                                                          |
| 314.126 | C01301 | -3.13 | 3 $\alpha$ ,7 $\alpha$ ,12 $\alpha$ -Trihydroxy-5 $\beta$ -cholestan-26-al                                                               |
| 314.178 | C00735 | -2.2  | Cortisol; Hydrocortisone; 11 $\beta$ ,17 $\alpha$ ,21-Trihydroxy-4-pregnene-3,20-dione; Kendall's compound F                             |
| 314.212 | C00523 | -2.23 | Androsterone; 3 $\alpha$ -Hydroxy-5 $\alpha$ -androstan-17-one                                                                           |
| 314.312 | C06425 | -1.99 | Icosanoic acid; Eicosanoic acid; Arachidic acid                                                                                          |
| 314.312 | C06425 | -2.04 | Icosanoic acid; Eicosanoic acid; Arachidic acid                                                                                          |
| 314.887 | C04540 | -2.87 | N <sub>4</sub> -(Acetyl- $\beta$ -D-glucosaminyl)asparagine; N <sub>4</sub> -( $\beta$ -N-Acetyl-D-glucosaminyl)-L-asparagine            |
| 315.079 | C00049 | -2.35 | L-Aspartate; L-Aspartic acid; 2-Aminosuccinic acid; L-Asp                                                                                |
| 315.188 | C05139 | -2.57 | 16 $\alpha$ -Hydroxydehydroepiandrosterone; 5-Androstene-3 $\beta$ ,16 $\alpha$ -diol-17-one                                             |
| 315.229 | C00410 | -5.02 | Progesterone; 4-Pregnene-3,20-dione                                                                                                      |
| 315.229 | C03852 | -4.3  | Androstan-3 $\alpha$ ,17 $\beta$ -diol; 5 $\alpha$ -Androstan-3 $\alpha$ ,17 $\beta$ -diol                                               |
| 316.196 | C02140 | -2.01 | Corticosterone; 11 $\beta$ ,21-Dihydroxy-4-pregnene-3,20-dione; Kendall's compound B; Reichstein's substance H                           |
| 316.226 | C05454 | -2.2  | 3 $\alpha$ ,7 $\alpha$ ,12 $\alpha$ -Trihydroxy-5 $\beta$ -cholestane; 5 $\beta$ -Cholestane-3 $\alpha$ ,7 $\alpha$ ,12 $\alpha$ -triol; |
| 316.984 | C01236 | -2.31 | D-Glucono-1,5-lactone 6-phosphate; 6-Phospho-D-glucono-1,5-lactone                                                                       |
| 317.207 | C04717 | -3.09 | (9Z,11E)-(13S)-13-Hydroperoxyoctadeca-9,11-dienoic acid; (9Z,11E)-(13S)-13-Hydroperoxyoctadeca-9,11-dienoate;                            |
| 317.207 | C16677 | -3.17 | all-trans-4-Hydroxyretinoic acid                                                                                                         |
| 317.207 | C16679 | -2.92 | all-trans-18-Hydroxyretinoic acid                                                                                                        |
| 317.207 | C16680 | -3.12 | all-trans-5,6-Epoxyretinoic acid; all-trans-5,6-Epoxy-5,6-dihydroretinoic acid                                                           |
| 317.243 | C01953 | -2.35 | Pregnenolone; 5-Pregnen-3 $\beta$ -ol-20-one; 3 $\beta$ -Hydroxypregn-5-en-20-one                                                        |
| 317.243 | C03681 | -3.46 | 5 $\alpha$ -Pregnane-3,20-dione; 5 $\alpha$ -Dihydroprogesterone                                                                         |
| 317.243 | C05479 | -3.35 | 5 $\beta$ -Pregnane-3,20-dione                                                                                                           |
| 318.214 | C01301 | -3.66 | 3 $\alpha$ ,7 $\alpha$ ,12 $\alpha$ -Trihydroxy-5 $\beta$ -cholestan-26-al                                                               |
| 318.214 | C16677 | -2.14 | all-trans-4-Hydroxyretinoic acid                                                                                                         |
| 318.214 | C16679 | -1.92 | all-trans-18-Hydroxyretinoic acid                                                                                                        |
| 318.214 | C16680 | -1.99 | all-trans-5,6-Epoxyretinoic acid; all-trans-5,6-Epoxy-5,6-dihydroretinoic acid                                                           |
| 318.293 | C11695 | -3.08 | Anandamide; Arachidonylethanolamide; N-(5Z,8Z,11Z,14Z-Eicosatetraenoyl)-ethanolamine; AEA                                                |
| 318.938 | C15650 | -2.61 | 2,3-Diketo-5-methylthiopentyl-1-phosphate; 5-(Methylthio)-2,3-dioxopentyl phosphate                                                      |
| 319.077 | C06427 | -1.75 | (9Z,12Z,15Z)-Octadecatrienoic acid; $\alpha$ -Linolenic acid; 9,12,15-Octadecatrienoic acid; Linolenate; $\alpha$ -Linolenate            |
| 319.164 | C02140 | -2.16 | Corticosterone; 11 $\beta$ ,21-Dihydroxy-4-pregnene-3,20-dione; Kendall's compound B; Reichstein's substance H                           |
| 319.194 | C00122 | -1.88 | Fumarate; Fumaric acid; trans-Butenedioic acid                                                                                           |
| 319.224 | C00909 | -1.68 | Leukotriene A <sub>4</sub> ; LTA <sub>4</sub> ; (7E,9E,11Z,14Z)-(5S,6S)-5,6-Epoxyeicosa-7,9,11,14-tetraenoic acid                        |
| 319.224 | C14825 | -1.75 | 9(10)-EpOME; (9R,10S)-(12Z)-9,10-Epoxyoctadecenoic acid                                                                                  |
| 319.224 | C14826 | -1.94 | 12(13)-EpOME; (12R,13S)-(9Z)-12,13-Epoxyoctadecenoic acid                                                                                |
| 320.153 | C00750 | -2.24 | Spermine; N,N'-Bis(3-aminopropyl)-1,4-butanediamine                                                                                      |
| 320.255 | C04707 | -3.08 | (5Z,13E)-11 $\alpha$ -Hydroxy-9,15-dioxoprost-13-enoate; (5Z)-(15S)-11 $\alpha$ -Hydroxy-9,15-dioxoprost-13-enoate                       |
| 321.076 | C05642 | -2.69 | Formyl-N-acetyl-5-methoxykynurenine                                                                                                      |
| 321.181 | C00410 | -4.2  | Progesterone; 4-Pregnene-3,20-dione                                                                                                      |
| 322.049 | C02305 | -2.45 | Phosphocreatine; N-Phosphocreatine; Creatine phosphate                                                                                   |
| 322.185 | C00410 | -3.23 | Progesterone; 4-Pregnene-3,20-dione                                                                                                      |
| 323.043 | C01762 | -3.01 | Xanthosine                                                                                                                               |
| 323.075 | C05382 | -1.91 | Sedoheptulose 7-phosphate; D-Sedoheptulose 7-phosphate; D-altro-Heptulose 7-phosphate                                                    |
| 323.153 | C00523 | -4.28 | Androsterone; 3 $\alpha$ -Hydroxy-5 $\alpha$ -androstan-17-one                                                                           |
| 323.197 | C00410 | -5.96 | Progesterone; 4-Pregnene-3,20-dione                                                                                                      |
| 324.201 | C00410 | -5.35 | Progesterone; 4-Pregnene-3,20-dione                                                                                                      |
| 324.288 | C00836 | -3.36 | Sphinganine; Dihydrosphingosine; 2-Amino-1,3-dihydroxyoctadecane                                                                         |
| 325.116 | C05300 | -1.7  | 16 $\alpha$ -Hydroxyestrone                                                                                                              |
| 325.212 | C00410 | -5.55 | Progesterone; 4-Pregnene-3,20-dione                                                                                                      |
| 326.171 | C02838 | -2.5  | L-Octanoylcarnitine                                                                                                                      |
| 326.216 | C00410 | -5.33 | Progesterone; 4-Pregnene-3,20-dione                                                                                                      |
| 327.014 | C01236 | -2.61 | D-Glucono-1,5-lactone 6-phosphate; 6-Phospho-D-glucono-1,5-lactone                                                                       |
| 327.116 | C01176 | -3.76 | 17 $\alpha$ -Hydroxyprogesterone; 17 $\alpha$ -Hydroxy-4-pregnene-3,20-dione; Pregn-4-ene-3,20-dione-17-ol                               |
| 327.116 | C05298 | -4.18 | 2-Hydroxyestrone                                                                                                                         |
| 327.116 | C05300 | -4.36 | 16 $\alpha$ -Hydroxyestrone                                                                                                              |
| 327.194 | C05139 | -2.17 | 16 $\alpha$ -Hydroxydehydroepiandrosterone; 5-Androstene-3 $\beta$ ,16 $\alpha$ -diol-17-one                                             |
| 327.194 | C05291 | -2.37 | 7 $\alpha$ -Hydroxytestosterone                                                                                                          |
| 327.194 | C05294 | -1.97 | 19-Hydroxytestosterone; 17 $\beta$ ,19-Dihydroxyandrost-4-en-3-one                                                                       |
| 327.194 | C05648 | -2.43 | 5-Hydroxy-N-formylkynurenine; 5-Hydroxy-N-formyl-L-kynurenine                                                                            |
| 327.228 | C00410 | -5.85 | Progesterone; 4-Pregnene-3,20-dione                                                                                                      |
| 327.288 | C05341 | -2.36 | $\beta$ -Alanyl-L-lysine                                                                                                                 |
| 328.232 | C00410 | -5.73 | Progesterone; 4-Pregnene-3,20-dione                                                                                                      |

|         |        |       |                                                                                                            |
|---------|--------|-------|------------------------------------------------------------------------------------------------------------|
| 328.819 | C00294 | -1.91 | Inosine                                                                                                    |
| 328.882 | C15650 | -2    | 2,3-Diketo-5-methylthiopentyl-1-phosphate; 5-(Methylthio)-2,3-dioxopentyl phosphate                        |
| 329.138 | C00735 | -4    | Cortisol; Hydrocortisone; 11beta,17alpha,21-Trihydroxy-4-pregnene-3,20-dione; Kendall's compound F         |
| 329.188 | C06425 | -2.91 | Icosanoic acid; Eicosanoic acid; Arachidic acid                                                            |
| 329.206 | C00376 | -1.71 | Retinal; Vitamin A aldehyde; Retinene; all-trans-Retinal; all-trans-Vitamin A aldehyde; all-trans-Retinene |
| 329.243 | C00410 | -6.25 | Progesterone; 4-Pregnene-3,20-dione                                                                        |
| 329.304 | C00735 | -1.89 | Cortisol; Hydrocortisone; 11beta,17alpha,21-Trihydroxy-4-pregnene-3,20-dione; Kendall's compound F         |
| 329.317 | C00376 | -2.96 | Retinal; Vitamin A aldehyde; Retinene; all-trans-Retinal; all-trans-Vitamin A aldehyde; all-trans-Retinene |
| 330.047 | C00239 | -2.44 | dCMP; Deoxycytidylic acid; Deoxycytidine monophosphate; Deoxycytidylate; 2'-Deoxycytidine 5'-monophosphate |
| 330.206 | C00735 | -4.58 | Cortisol; Hydrocortisone; 11beta,17alpha,21-Trihydroxy-4-pregnene-3,20-dione; Kendall's compound F         |
| 330.246 | C00410 | -5.57 | Progesterone; 4-Pregnene-3,20-dione                                                                        |
| 331.095 | C03406 | -2.34 | N-(L-Arginino)succinate; 2-(Nomega-L-Arginino)succinate; L-Argininosuccinate; L-Argininosuccinic acid      |
| 331.095 | C03722 | -1.75 | Quinolate; Pyridine-2,3-dicarboxylate; Quinolinic acid; 2,3-Pyridinedicarboxylic acid                      |
| 331.186 | C03917 | -2.34 | Dihydrotestosterone; 17beta-Hydroxyandrost-3-one; Androstanolone; 17beta-Hydroxy-5alpha-androstan-3-one    |
| 331.186 | C04295 | -2.03 | Androstenediol; Androst-5-ene-3beta,17beta-diol; 3beta,17beta-Dihydroxyandrost-5-ene                       |
| 331.186 | C05293 | -2.05 | 5beta-Dihydrotestosterone                                                                                  |
| 331.918 | C00468 | -2.37 | Estrone; 3-Hydroxy-1,3,5(10)-estratrien-17-one                                                             |
| 332.007 | C05382 | -2.05 | Sedoheptulose 7-phosphate; D-Sedoheptulose 7-phosphate; D-alto-Heptulose 7-phosphate                       |
| 332.007 | C06222 | -1.96 | Sedoheptulose 1-phosphate; alto-Heptulose 1-phosphate                                                      |
| 332.082 | C00130 | -1.71 | IMP; Inosinic acid; Inosine monophosphate; Inosine 5'-monophosphate; Inosine 5'-phosphate; 5'-Inosinate    |
| 332.177 | C00327 | -3.38 | L-Citrulline; 2-Amino-5-ureidovaleric acid; Citrulline                                                     |
| 332.259 | C01953 | -4.18 | Pregnenolone; 5-Pregnen-3beta-ol-20-one; 3beta-Hydroxypregn-5-en-20-one                                    |
| 333.047 | C00363 | -1.93 | dTDP; Deoxythymidine 5'-diphosphate                                                                        |
| 333.112 | C00363 | -2.93 | dTDP; Deoxythymidine 5'-diphosphate                                                                        |
| 333.239 | C02140 | -3.84 | Corticosterone; 11beta,21-Dihydroxy-4-pregnene-3,20-dione; Kendall's compound B; Reichstein's substance H  |
| 333.239 | C05485 | -2.37 | 21-Hydroxypregnenolone                                                                                     |
| 334.047 | C00130 | -1.88 | IMP; Inosinic acid; Inosine monophosphate; Inosine 5'-monophosphate; Inosine 5'-phosphate; 5'-Inosinate    |
| 334.082 | C00523 | -1.92 | Androsterone; 3alpha-Hydroxy-5alpha-androstan-17-one                                                       |
| 334.122 | C00300 | -2.62 | Creatine; alpha-Methylguanidino acetic acid; Methylglycocycamine                                           |
| 334.168 | C05476 | -5.68 | Tetrahydrocorticosterone                                                                                   |
| 334.934 | C04540 | -2.48 | N4-(Acetyl-beta-D-glucosaminyl)asparagine; N4-(beta-N-Acetyl-D-glucosaminyl)-L-asparagine                  |
| 335.096 | C00363 | -2.83 | dTDP; Deoxythymidine 5'-diphosphate                                                                        |
| 335.162 | C05141 | -4.59 | Estriol; 1,3,5(10)-Estratriene-3,16-alpha,17beta-triol                                                     |
| 335.218 | C11695 | -2.01 | Anandamide; Arachidonylethanolamide; N-(5Z,8Z,11Z,14Z-Eicosatetraenoyl)-ethanolamine; AEA                  |
| 335.252 | C00468 | -2.53 | Estrone; 3-Hydroxy-1,3,5(10)-estratrien-17-one                                                             |
| 336.04  | C00130 | -2.43 | IMP; Inosinic acid; Inosine monophosphate; Inosine 5'-monophosphate; Inosine 5'-phosphate; 5'-Inosinate    |
| 336.169 | C05141 | -3.82 | Estriol; 1,3,5(10)-Estratriene-3,16-alpha,17beta-triol                                                     |
| 336.186 | C14772 | -1.74 | 5,6-DHET; (8Z,11Z,14Z)-5,6-Dihydroxyeicosa-8,11,14-trienoic acid                                           |
| 336.222 | C11695 | -1.78 | Anandamide; Arachidonylethanolamide; N-(5Z,8Z,11Z,14Z-Eicosatetraenoyl)-ethanolamine; AEA                  |
| 337.175 | C00410 | -2.97 | Progesterone; 4-Pregnene-3,20-dione                                                                        |
| 337.233 | C02165 | -3.06 | Leukotriene B4; (6Z,8E,10E,14Z)-(5S,12R)-5,12-Dihydroxyeicosa-6,8,10,14-tetraenoate                        |
| 337.233 | C05356 | -3.42 | 5(S)-HPETE; 5(S)-Hydroperoxy-6-trans-8,11,14-cis-eicosatetraenoic acid                                     |
| 337.233 | C05965 | -4.08 | 12(S)-HPETE; (5Z,8Z,10E,14Z)-(12S)-12-Hydroperoxyeicosa-5,8,10,14-tetraenoic acid                          |
| 337.233 | C05966 | -3.57 | 15(S)-HPETE; (5Z,8Z,11Z,13E)-(15S)-15-Hydroperoxyeicosa-5,8,11,13-tetraenoic acid                          |
| 337.233 | C14781 | -3.65 | 15H-11,12-EETA; 15-Hydroxy-11,12-epoxyeicosatrienoic acid                                                  |
| 337.233 | C14813 | -3.41 | 11H-14,15-EETA; 11-Hydroxy-14,15-EETA; 11-Hydroxy-14,15-epoxyeicosatrienoic acid                           |
| 337.308 | C00881 | -1.98 | Deoxycytidine; 2'-Deoxycytidine                                                                            |
| 338.178 | C01953 | -2.78 | Pregnenolone; 5-Pregnen-3beta-ol-20-one; 3beta-Hydroxypregn-5-en-20-one                                    |
| 339.192 | C00410 | -4.87 | Progesterone; 4-Pregnene-3,20-dione                                                                        |
| 339.221 | C00762 | -5.24 | Cortisone; 17alpha,21-Dihydroxy-4-pregnene-3,11,20-trione; Kendall's compound E; Reichstein's substance Fa |
| 339.286 | C00468 | -1.94 | Estrone; 3-Hydroxy-1,3,5(10)-estratrien-17-one                                                             |
| 340.136 | C11695 | -2.76 | Anandamide; Arachidonylethanolamide; N-(5Z,8Z,11Z,14Z-Eicosatetraenoyl)-ethanolamine; AEA                  |
| 341.016 | C00160 | -3.08 | Glycolate; Glycolic acid; Hydroxyacetic acid                                                               |
| 341.105 | C00735 | -1.97 | Cortisol; Hydrocortisone; 11beta,17alpha,21-Trihydroxy-4-pregnene-3,20-dione; Kendall's compound F         |
| 341.207 | C00410 | -4.15 | Progesterone; 4-Pregnene-3,20-dione                                                                        |
| 341.241 | C05480 | -2.73 | Pregnanolone; 3alpha-Hydroxy-5beta-pregnan-20-one                                                          |
| 341.241 | C13712 | -2.76 | Allopregnanolone; 3alpha-Hydroxy-5alpha-pregnan-20-one; 3alpha-OH DHP                                      |
| 341.264 | C05761 | -1.75 | Tetradecanoyl-[acp]; Tetradecanoyl-[acyl-carrier protein]; Myristoyl-[acyl-carrier protein]                |
| 341.342 | C06425 | -1.79 | Icosanoic acid; Eicosanoic acid; Arachidic acid                                                            |
| 342.031 | C00330 | -1.96 | Deoxyguanosine; 2'-Deoxyguanosine                                                                          |
| 342.063 | C04707 | -2.99 | (5Z,13E)-11alpha-Hydroxy-9,15-dioxoprost-13-enoate; (5Z)-(15S)-11alpha-Hydroxy-9,15-dioxoprost-13-enoate   |
| 342.209 | C00410 | -3.31 | Progesterone; 4-Pregnene-3,20-dione                                                                        |
| 342.246 | C05480 | -3.28 | Pregnanolone; 3alpha-Hydroxy-5beta-pregnan-20-one                                                          |
| 342.246 | C13712 | -3.31 | Allopregnanolone; 3alpha-Hydroxy-5alpha-pregnan-20-one; 3alpha-OH DHP                                      |
| 342.342 | C06425 | -2.5  | Icosanoic acid; Eicosanoic acid; Arachidic acid                                                            |
| 343.2   | C05490 | -8.36 | 11-Dehydrocorticosterone                                                                                   |
| 343.221 | C00951 | -2.2  | Estradiol-17beta; Estradiol; beta-Estradiol                                                                |
| 344.205 | C00410 | -6.99 | Progesterone; 4-Pregnene-3,20-dione                                                                        |
| 345.208 | C00535 | -3.23 | Testosterone; 17beta-Hydroxy-4-androsten-3-one                                                             |
| 345.208 | C05490 | -5.53 | 11-Dehydrocorticosterone                                                                                   |
| 345.236 | C00410 | -4.76 | Progesterone; 4-Pregnene-3,20-dione                                                                        |
| 346.237 | C00410 | -2.12 | Progesterone; 4-Pregnene-3,20-dione                                                                        |
| 347.065 | C00655 | -2.16 | Xanthosine 5'-phosphate; Xanthylic acid; XMP; (9-D-Ribosylxanthine)-5'-phosphate                           |
| 347.217 | C02140 | -3.59 | Corticosterone; 11beta,21-Dihydroxy-4-pregnene-3,20-dione; Kendall's compound B; Reichstein's substance H  |
| 347.217 | C05477 | -3.6  | 21-Hydroxy-5beta-pregnan-3,11,20-trione                                                                    |
| 347.217 | C05488 | -2.3  | 11-Deoxycortisol; Cortodoxone                                                                              |
| 347.217 | C05497 | -2.84 | 21-Deoxycortisol; 4-Pregnene-11beta,17alpha-diol-3,20-dione; 11beta,17alpha-Dihydroxyprogesterone          |
| 347.291 | C00523 | -2.36 | Androsterone; 3alpha-Hydroxy-5alpha-androstan-17-one                                                       |
| 348.192 | C01301 | -2.94 | 3alpha,7alpha,12alpha-Trihydroxy-5beta-cholestan-26-al                                                     |
| 348.218 | C05138 | -2.9  | 17alpha-Hydroxypregnenolone                                                                                |
| 348.286 | C11695 | -2.97 | Anandamide; Arachidonylethanolamide; N-(5Z,8Z,11Z,14Z-Eicosatetraenoyl)-ethanolamine; AEA                  |
| 349.056 | C00300 | -1.87 | Creatine; alpha-Methylguanidino acetic acid; Methylglycocycamine                                           |
| 349.224 | C05476 | -1.92 | Tetrahydrocorticosterone                                                                                   |

|         |        |       |                                                                                                              |
|---------|--------|-------|--------------------------------------------------------------------------------------------------------------|
| 349.224 | C05477 | -2.24 | 21-Hydroxy-5beta-pregnane-3,11,20-trione                                                                     |
| 349.267 | C00523 | -2.46 | Androsterone; 3alpha-Hydroxy-5alpha-androstan-17-one                                                         |
| 350.058 | C05922 | -2.06 | Formamidopyrimidine nucleoside triphosphate                                                                  |
| 350.187 | C05959 | -2.88 | 11-epi-Prostaglandin F2alpha; 11-epi-Prostaglandin F2a; 11-epi-PGF2alpha; 11-epi-PGF2a                       |
| 350.23  | C01301 | -2.59 | 3alpha,7alpha,12alpha-Trihydroxy-5beta-cholestan-26-al                                                       |
| 351.2   | C01301 | -3.94 | 3alpha,7alpha,12alpha-Trihydroxy-5beta-cholestan-26-al                                                       |
| 352.057 | C00363 | -3.14 | dTDP; Deoxythymidine 5'-diphosphate                                                                          |
| 352.202 | C04707 | -3.79 | (5Z,13E)-11alpha-Hydroxy-9,15-dioxoprost-13-enoate; (5Z)-(15S)-11alpha-Hydroxy-9,15-dioxoprost-13-enoate     |
| 352.222 | C13713 | -2.4  | Allotetrahydrodeoxycorticosterone; 5alpha-THDOC; 3alpha,21-Dihydroxy-5alpha-pregnan-20-one                   |
| 353.073 | C00921 | -3.51 | Dihydropteroate; 7,8-Dihydropteroate                                                                         |
| 353.208 | C01176 | -5.16 | 17alpha-Hydroxyprogesterone; 17alpha-Hydroxy-4-pregnene-3,20-dione                                           |
| 353.208 | C03205 | -7.3  | 11-Deoxycorticosterone; Deoxycorticosterone; Cortexone; 21-Hydroxy-4-pregnene-3,20-dione; Desoxycortone; DOC |
| 353.208 | C05498 | -6.99 | 11beta-Hydroxyprogesterone                                                                                   |
| 354.158 | C00526 | -2.3  | Deoxyuridine; 2-Deoxyuridine; 2'-Deoxyuridine                                                                |
| 354.171 | C05648 | -2.07 | 5-Hydroxy-N-formylkynurenine; 5-Hydroxy-N-formyl-L-kynurenine                                                |
| 354.892 | C00197 | -2.45 | 3-Phospho-D-glycerate; D-Glycerate 3-phosphate; 3-Phospho-(R)-glycerate; 3-Phosphoglycerate                  |
| 355.1   | C02990 | -2.79 | L-Palmitoylcarnitine                                                                                         |
| 355.188 | C00410 | -3.48 | Progesterone; 4-Pregnene-3,20-dione                                                                          |
| 355.218 | C05490 | -5.31 | 11-Dehydrocorticosterone                                                                                     |
| 356.19  | C00410 | -4.01 | Progesterone; 4-Pregnene-3,20-dione                                                                          |
| 356.231 | C04707 | -4.18 | (5Z,13E)-11alpha-Hydroxy-9,15-dioxoprost-13-enoate; (5Z)-(15S)-11alpha-Hydroxy-9,15-dioxoprost-13-enoate     |
| 357.202 | C00523 | -2.51 | Androsterone; 3alpha-Hydroxy-5alpha-androstan-17-one                                                         |
| 357.232 | C00535 | -2.91 | Testosterone; 17beta-Hydroxy-4-androsten-3-one                                                               |
| 358.032 | C00104 | -2.78 | IDP; Inosine 5'-diphosphate; Inosine diphosphate                                                             |
| 358.208 | C05642 | -2.67 | Formyl-N-acetyl-5-methoxykynurenamine                                                                        |
| 358.232 | C04707 | -3.55 | (5Z,13E)-11alpha-Hydroxy-9,15-dioxoprost-13-enoate; (5Z)-(15S)-11alpha-Hydroxy-9,15-dioxoprost-13-enoate     |
| 359.124 | C05711 | -2.41 | gamma-Glutamyl-beta-cyanoalanine                                                                             |
| 359.215 | C00523 | -2.16 | Androsterone; 3alpha-Hydroxy-5alpha-androstan-17-one                                                         |
| 360.219 | C05480 | -2.19 | Pregnanolone; 3alpha-Hydroxy-5beta-pregnan-20-one                                                            |
| 361.015 | C00364 | -1.68 | dTMP; Thymidine 5'-phosphate; Deoxythymidine 5'-phosphate; Thymidylic acid; 5'-Thymidylic acid               |
| 361.104 | C00363 | -1.8  | dTDP; Deoxythymidine 5'-diphosphate                                                                          |
| 361.167 | C00523 | -1.84 | Androsterone; 3alpha-Hydroxy-5alpha-androstan-17-one                                                         |
| 361.205 | C00762 | -4.15 | Cortisone; 17alpha,21-Dihydroxy-4-pregnene-3,11,20-trione; Kendall's compound E; Reichstein's substance Fa   |
| 361.205 | C01780 | -5.37 | Aldosterone; 11beta,21-Dihydroxy-3,20-dioxo-4-pregnen-18-al                                                  |
| 361.233 | C02140 | -2.06 | Corticosterone; 11beta,21-Dihydroxy-4-pregnene-3,20-dione; Kendall's compound B; Reichstein's substance H    |
| 361.27  | C00535 | -4.14 | Testosterone; 17beta-Hydroxy-4-androsten-3-one                                                               |
| 361.885 | C05341 | -1.82 | beta-Alanyl-L-lysine                                                                                         |
| 361.973 | C00062 | -4.39 | L-Arginine; (S)-2-Amino-5-guanidinovaleric acid; L-Arg                                                       |
| 362.885 | C03232 | -2.07 | 3-Phosphonooxypyruvate; 3-Phosphonooxypyruvic acid; 3-Phosphohydroxypyruvate                                 |
| 363.125 | C02999 | -1.92 | N-Acetylmuramoyl-Ala; N-Acetyl-D-muramoyl-L-alanine                                                          |
| 363.217 | C03588 | -1.93 | 4,5alpha-Dihydrocortisone                                                                                    |
| 363.217 | C05469 | -1.77 | 17alpha,21-Dihydroxy-5beta-pregnane-3,11,20-trione; 5beta-Pregnane-17alpha,21-diol-3,11,20-trione            |
| 363.245 | C00523 | -2.42 | Androsterone; 3alpha-Hydroxy-5alpha-androstan-17-one                                                         |
| 364.017 | C00167 | -1.83 | UDP-glucuronate; UDPglucuronate; UDP-D-glucuronate; UDP-alpha-D-glucuronate                                  |
| 364.017 | C00364 | -3.05 | dTMP; Thymidine 5'-phosphate; Deoxythymidine 5'-phosphate; Thymidylic acid; 5'-Thymidylic acid               |
| 364.017 | C00364 | -3.09 | dTMP; Thymidine 5'-phosphate; Deoxythymidine 5'-phosphate; Thymidylic acid; 5'-Thymidylic acid               |
| 364.178 | C04717 | -1.82 | (9Z,11E)-(13S)-13-Hydroperoxyoctadeca-9,11-dienoic acid; (9Z,11E)-(13S)-13-Hydroperoxyoctadeca-9,11-dienoate |
| 364.32  | C00523 | -3.06 | Androsterone; 3alpha-Hydroxy-5alpha-androstan-17-one                                                         |
| 365.196 | C02838 | -1.97 | L-Octanoylcarnitine                                                                                          |
| 366.197 | C16677 | -2.21 | all-trans-4-Hydroxyretinoic acid                                                                             |
| 367.12  | C00294 | -1.9  | Inosine                                                                                                      |
| 367.244 | C05472 | -1.95 | Urocortisol; Tetrahydrocortisol; 5beta-Pregnane-3alpha,11beta,17alpha,21-tetrol-20-one                       |
| 367.964 | C05699 | -1.68 | L-Selenocystathionine                                                                                        |
| 368.198 | C05454 | -2.33 | 3alpha,7alpha,12alpha-Trihydroxy-5beta-cholestane; 5beta-Cholestane-3alpha,7alpha,12alpha-triol              |
| 368.249 | C05472 | -5.59 | Urocortisol; Tetrahydrocortisol; 5beta-Pregnane-3alpha,11beta,17alpha,21-tetrol-20-one                       |
| 369.199 | C02140 | -5.78 | Corticosterone; 11beta,21-Dihydroxy-4-pregnene-3,20-dione; Kendall's compound B; Reichstein's substance H    |
| 369.199 | C05477 | -6.09 | 21-Hydroxy-5beta-pregnane-3,11,20-trione                                                                     |
| 369.199 | C05488 | -4.09 | 11-Deoxycortisol; Cortodoxone                                                                                |
| 369.199 | C05497 | -4.43 | 21-Deoxycortisol; 4-Pregnene-11beta,17alpha-diol-3,20-dione; 11beta,17alpha-Dihydroxyprogesterone            |
| 370.003 | C05922 | -2.18 | Formamidopyrimidine nucleoside triphosphate                                                                  |
| 371.164 | C13713 | -2.77 | Allotetrahydrodeoxycorticosterone; 5alpha-THDOC; 3alpha,21-Dihydroxy-5alpha-pregnan-20-one                   |
| 371.194 | C02140 | -4.79 | Corticosterone; 11beta,21-Dihydroxy-4-pregnene-3,20-dione; Kendall's compound B; Reichstein's substance H    |
| 371.194 | C05138 | -2.29 | 17alpha-Hydroxypregnenolone                                                                                  |
| 371.194 | C05485 | -3.39 | 21-Hydroxypregnenolone                                                                                       |
| 371.217 | C05475 | -4.09 | 11beta,21-Dihydroxy-5beta-pregnane-3,20-dione; 5beta-Pregnane-11beta,21-diol-3,20-dione                      |
| 371.217 | C05478 | -4.42 | 3alpha,21-Dihydroxy-5beta-pregnane-11,20-dione; 5beta-Pregnane-3alpha,21-diol-11,20-dione                    |
| 371.217 | C05487 | -2.46 | 17alpha,21-Dihydroxypregnenolone                                                                             |
| 372.002 | C00130 | -2.07 | IMP; Inosinic acid; Inosine monophosphate; Inosine 5'-monophosphate; Inosine 5'-phosphate; 5'-Inosinate      |
| 372.208 | C03640 | -2.15 | Sphingosyl-phosphocholine                                                                                    |
| 372.994 | C00130 | -2.03 | IMP; Inosinic acid; Inosine monophosphate; Inosine 5'-monophosphate; Inosine 5'-phosphate; 5'-Inosinate      |
| 373.237 | C05476 | -3.91 | Tetrahydrocorticosterone                                                                                     |
| 374.04  | C00363 | -2.91 | dTDP; Deoxythymidine 5'-diphosphate                                                                          |
| 374.202 | C01301 | -3.99 | 3alpha,7alpha,12alpha-Trihydroxy-5beta-cholestan-26-al                                                       |
| 374.27  | C05476 | -3.11 | Tetrahydrocorticosterone                                                                                     |
| 375.12  | C00104 | -2.59 | IDP; Inosine 5'-diphosphate; Inosine diphosphate                                                             |
| 375.222 | C13713 | -5.49 | Allotetrahydrodeoxycorticosterone; 5alpha-THDOC; 3alpha,21-Dihydroxy-5alpha-pregnan-20-one                   |
| 375.248 | C00190 | -2.02 | Glucosylceramide; Glucocerebroside; beta-D-Glucosyl-(1-<>1)-ceramide; D-Glucosyl-N-acylsphingosine           |
| 376.009 | C00049 | -2.05 | L-Aspartate; L-Aspartic acid; 2-Aminosuccinic acid; L-Asp                                                    |
| 376.146 | C05648 | -2.18 | 5-Hydroxy-N-formylkynurenine; 5-Hydroxy-N-formyl-L-kynurenine                                                |
| 376.146 | C05692 | -2.28 | Se-Adenosyl-L-selenohomocysteine; Se-Adenosylselenohomocysteine                                              |
| 376.194 | C04707 | -2.72 | (5Z,13E)-11alpha-Hydroxy-9,15-dioxoprost-13-enoate; (5Z)-(15S)-11alpha-Hydroxy-9,15-dioxoprost-13-enoate     |
| 376.224 | C05138 | -3.67 | 17alpha-Hydroxypregnenolone                                                                                  |
| 376.253 | C00190 | -1.74 | Glucosylceramide; Glucocerebroside; beta-D-Glucosyl-(1-<>1)-ceramide; D-Glucosyl-N-acylsphingosine           |

|         |        |       |                                                                                                                   |
|---------|--------|-------|-------------------------------------------------------------------------------------------------------------------|
| 377.085 | C00363 | -3.55 | dTDP; Deoxythymidine 5'-diphosphate                                                                               |
| 377.187 | C14772 | -2.77 | 5,6-DHET; (8Z,11Z,14Z)-5,6-Dihydroxyeicosa-8,11,14-trienoic acid                                                  |
| 377.206 | C00735 | -4.82 | Cortisol; Hydrocortisone; 11beta,17alpha,21-Trihydroxy-4-pregnene-3,20-dione; Kendall's compound F                |
| 377.214 | C05138 | -2.21 | 17alpha-Hydroxypregnenolone                                                                                       |
| 377.993 | C05382 | -1.98 | Sedoheptulose 7-phosphate; D-Sedoheptulose 7-phosphate; D-altrio-Heptulose 7-phosphate                            |
| 378.182 | C04707 | -2.85 | (5Z,13E)-11alpha-Hydroxy-9,15-dioxoprost-13-enoate; (5Z)-(15S)-11alpha-Hydroxy-9,15-dioxoprost-13-enoate          |
| 378.194 | C14772 | -2.46 | 5,6-DHET; (8Z,11Z,14Z)-5,6-Dihydroxyeicosa-8,11,14-trienoic acid                                                  |
| 378.216 | C14772 | -1.86 | 5,6-DHET; (8Z,11Z,14Z)-5,6-Dihydroxyeicosa-8,11,14-trienoic acid                                                  |
| 378.216 | C16677 | -1.79 | all-trans-4-Hydroxyretinoic acid                                                                                  |
| 378.226 | C00735 | -2.23 | Cortisol; Hydrocortisone; 11beta,17alpha,21-Trihydroxy-4-pregnene-3,20-dione; Kendall's compound F                |
| 378.99  | C05382 | -2.25 | Sedoheptulose 7-phosphate; D-Sedoheptulose 7-phosphate; D-altrio-Heptulose 7-phosphate                            |
| 379.195 | C02838 | -1.96 | L-Octanoylcarnitine                                                                                               |
| 379.22  | C05476 | -3.43 | Tetrahydrocorticosterone                                                                                          |
| 381.196 | C04717 | -2.35 | (9Z,11E)-(13S)-13-Hydroperoxyoctadeca-9,11-dienoic acid; (9Z,11E)-(13S)-13-Hydroperoxyoctadeca-9,11-dienoate      |
| 382.198 | C04540 | -2    | N4-(Acetyl-beta-D-glucosaminyl)asparagine; N4-(beta-N-Acetyl-D-glucosaminyl)-L-asparagine                         |
| 383.026 | C06198 | -1.83 | P1,P4-Bis(5'-uridylyl) tetraphosphate; UppppU                                                                     |
| 383.115 | C00031 | -2.59 | D-Glucose; Grape sugar; Dextrose; Glucose; D-Glucopyranose                                                        |
| 383.211 | C05476 | -5.33 | Tetrahydrocorticosterone                                                                                          |
| 384.118 | C00031 | -3.21 | D-Glucose; Grape sugar; Dextrose; Glucose; D-Glucopyranose                                                        |
| 384.169 | C01301 | -2.07 | 3alpha,7alpha,12alpha-Trihydroxy-5beta-cholestan-26-al                                                            |
| 385.121 | C00031 | -2.77 | D-Glucose; Grape sugar; Dextrose; Glucose; D-Glucopyranose                                                        |
| 385.182 | C02140 | -8.01 | Corticosterone; 11beta,21-Dihydroxy-4-pregnene-3,20-dione; Kendall's compound B; Reichstein's substance H         |
| 385.182 | C05477 | -8.54 | 21-Hydroxy-5beta-pregnane-3,11,20-trione                                                                          |
| 385.182 | C05488 | -5.91 | 11-Deoxycortisol; Cortodoxone                                                                                     |
| 385.182 | C05497 | -6.91 | 21-Deoxycortisol; 4-Pregnene-11beta,17alpha-diol-3,20-dione; 11beta,17alpha-Dihydroxyprogesterone                 |
| 386.262 | C01190 | -2.1  | Glucosylceramide; Glucocerebroside; beta-D-Glucosyl-(1->1)-ceramide; D-Glucosyl-N-acylsphingosine                 |
| 387.183 | C02140 | -6.43 | Corticosterone; 11beta,21-Dihydroxy-4-pregnene-3,20-dione; Kendall's compound B; Reichstein's substance H         |
| 387.183 | C05477 | -7.13 | 21-Hydroxy-5beta-pregnane-3,11,20-trione                                                                          |
| 387.183 | C05488 | -5.9  | 11-Deoxycortisol; Cortodoxone                                                                                     |
| 387.183 | C05497 | -6.07 | 21-Deoxycortisol; 4-Pregnene-11beta,17alpha-diol-3,20-dione; 11beta,17alpha-Dihydroxyprogesterone                 |
| 387.249 | C00523 | -3.7  | Androsterone; 3alpha-Hydroxy-5alpha-androstan-17-one                                                              |
| 388.178 | C04707 | -3.06 | (5Z,13E)-11alpha-Hydroxy-9,15-dioxoprost-13-enoate; (5Z)-(15S)-11alpha-Hydroxy-9,15-dioxoprost-13-enoate          |
| 388.273 | C14772 | -2.57 | 5,6-DHET; (8Z,11Z,14Z)-5,6-Dihydroxyeicosa-8,11,14-trienoic acid                                                  |
| 389.169 | C04707 | -1.75 | (5Z,13E)-11alpha-Hydroxy-9,15-dioxoprost-13-enoate; (5Z)-(15S)-11alpha-Hydroxy-9,15-dioxoprost-13-enoate          |
| 389.198 | C00376 | -1.76 | Retinal; Vitamin A aldehyde; Retinene; all-trans-Retinal; all-trans-Vitamin A aldehyde; all-trans-Retinene        |
| 389.339 | C00836 | -2.26 | Sphinganine; Dihydrosphingosine; 2-Amino-1,3-dihydroxyoctadecane                                                  |
| 390.174 | C04707 | -3.3  | (5Z,13E)-11alpha-Hydroxy-9,15-dioxoprost-13-enoate; (5Z)-(15S)-11alpha-Hydroxy-9,15-dioxoprost-13-enoate          |
| 390.174 | C04707 | -3.66 | (5Z,13E)-11alpha-Hydroxy-9,15-dioxoprost-13-enoate; (5Z)-(15S)-11alpha-Hydroxy-9,15-dioxoprost-13-enoate          |
| 391.11  | C00104 | -2.74 | IDP; Inosine 5'-diphosphate; Inosine diphosphate                                                                  |
| 391.11  | C05692 | -2.53 | Se-Adenosyl-L-selenohomocysteine; Se-Adenosylselenohomocysteine                                                   |
| 391.221 | C00735 | -2.72 | Cortisol; Hydrocortisone; 11beta,17alpha,21-Trihydroxy-4-pregnene-3,20-dione; Kendall's compound F                |
| 392.188 | C01301 | -4.69 | 3alpha,7alpha,12alpha-Trihydroxy-5beta-cholestan-26-al                                                            |
| 393.207 | C05959 | -3.02 | 11-epi-Prostaglandin F2alpha; 11-epi-Prostaglandin F2a; 11-epi-PGF2alpha; 11-epi-PGF2a                            |
| 393.207 | C14782 | -3.03 | 11,12,15-THETA; 11,12,15-Trihydroxyicosatrienoic acid                                                             |
| 393.207 | C14814 | -2.97 | 11,14,15-THETA; 11,14,15-Trihydroxyicosatrienoic acid; (5Z,8Z,12E)-11,14,15-Trihydroxyeicosa-5,8,12-trienoic acid |
| 393.259 | C02838 | -3.22 | L-Octanoylcarnitine                                                                                               |
| 394.212 | C05959 | -2.8  | 11-epi-Prostaglandin F2alpha; 11-epi-Prostaglandin F2a; 11-epi-PGF2alpha; 11-epi-PGF2a                            |
| 394.212 | C14782 | -2.8  | 11,12,15-THETA; 11,12,15-Trihydroxyicosatrienoic acid                                                             |
| 394.212 | C14814 | -2.83 | 11,14,15-THETA; 11,14,15-Trihydroxyicosatrienoic acid; (5Z,8Z,12E)-11,14,15-Trihydroxyeicosa-5,8,12-trienoic acid |
| 394.259 | C02165 | -1.7  | Leukotriene B4; (6Z,8E,10E,14Z)-(5S,12R)-5,12-Dihydroxyeicosa-6,8,10,14-tetraenoate                               |
| 395.171 | C01301 | -2.45 | 3alpha,7alpha,12alpha-Trihydroxy-5beta-cholestan-26-al                                                            |
| 396.225 | C01301 | -1.7  | 3alpha,7alpha,12alpha-Trihydroxy-5beta-cholestan-26-al                                                            |
| 396.805 | C00294 | -1.98 | Inosine                                                                                                           |
| 396.922 | C00117 | -2.43 | D-Ribose 5-phosphate; Ribose 5-phosphate                                                                          |
| 397.107 | C03758 | -1.98 | Dopamine; 4-(2-Aminoethyl)-1,2-benzenediol; 4-(2-Aminoethyl)benzene-1,2-diol; 3,4-Dihydroxyphenethylamine         |
| 397.183 | C05648 | -1.8  | 5-Hydroxy-N-formylkynurenine; 5-Hydroxy-N-formyl-L-kynurenine                                                     |
| 397.237 | C01301 | -2.35 | 3alpha,7alpha,12alpha-Trihydroxy-5beta-cholestan-26-al                                                            |
| 398.108 | C02051 | -3    | Lipoylprotein; H-Protein-lipoylysine; [GCSH]-N6-lipoyl-L-lysine; [GcvH]-N6-lipoyl-L-lysine                        |
| 398.199 | C02838 | -2.03 | L-Octanoylcarnitine                                                                                               |
| 398.241 | C04707 | -3.17 | (5Z,13E)-11alpha-Hydroxy-9,15-dioxoprost-13-enoate; (5Z)-(15S)-11alpha-Hydroxy-9,15-dioxoprost-13-enoate          |
| 399.088 | C00031 | -2.03 | D-Glucose; Grape sugar; Dextrose; Glucose; D-Glucopyranose                                                        |
| 399.182 | C05761 | -1.77 | Tetradecanoyl-[acp]; Tetradecanoyl-[acyl-carrier protein]; Myristoyl-[acyl-carrier protein]                       |
| 400.092 | C00031 | -2.37 | D-Glucose; Grape sugar; Dextrose; Glucose; D-Glucopyranose                                                        |
| 400.211 | C01301 | -2.66 | 3alpha,7alpha,12alpha-Trihydroxy-5beta-cholestan-26-al                                                            |
| 401.088 | C00031 | -2.55 | D-Glucose; Grape sugar; Dextrose; Glucose; D-Glucopyranose                                                        |
| 401.17  | C00735 | -3.02 | Cortisol; Hydrocortisone; 11beta,17alpha,21-Trihydroxy-4-pregnene-3,20-dione; Kendall's compound F                |
| 401.17  | C01124 | -3.94 | 18-Hydroxycorticosterone                                                                                          |
| 401.17  | C03588 | -2.9  | 4,5alpha-Dihydrocortisone                                                                                         |
| 401.17  | C05469 | -2.98 | 17alpha,21-Dihydroxy-5beta-pregnane-3,11,20-trione; 5beta-Pregnane-17alpha,21-diol-3,11,20-trione                 |
| 401.17  | C05473 | -3.11 | 11beta,21-Dihydroxy-3,20-oxo-5beta-pregnan-18-al                                                                  |
| 401.225 | C05138 | -1.71 | 17alpha-Hydroxypregnenolone                                                                                       |
| 401.89  | C06425 | -1.66 | Icosanoic acid; Eicosanoic acid; Arachidic acid                                                                   |
| 402.175 | C05454 | -2.12 | 3alpha,7alpha,12alpha-Trihydroxy-5beta-cholestane; 5beta-Cholestane-3alpha,7alpha,12alpha-triol                   |
| 402.248 | C02835 | -2.38 | Imidazole-4-acetate; Imidazoleacetic acid; 4-Imidazoleacetate                                                     |
| 403.176 | C00735 | -3.82 | Cortisol; Hydrocortisone; 11beta,17alpha,21-Trihydroxy-4-pregnene-3,20-dione; Kendall's compound F                |
| 403.176 | C00735 | -3.89 | Cortisol; Hydrocortisone; 11beta,17alpha,21-Trihydroxy-4-pregnene-3,20-dione; Kendall's compound F                |
| 403.176 | C01124 | -4.68 | 18-Hydroxycorticosterone                                                                                          |
| 403.176 | C01124 | -4.97 | 18-Hydroxycorticosterone                                                                                          |
| 403.176 | C03588 | -4.17 | 4,5alpha-Dihydrocortisone                                                                                         |
| 403.176 | C03588 | -4.55 | 4,5alpha-Dihydrocortisone                                                                                         |
| 403.176 | C05469 | -3.89 | 17alpha,21-Dihydroxy-5beta-pregnane-3,11,20-trione; 5beta-Pregnane-17alpha,21-diol-3,11,20-trione                 |
| 403.176 | C05469 | -4.5  | 17alpha,21-Dihydroxy-5beta-pregnane-3,11,20-trione; 5beta-Pregnane-17alpha,21-diol-3,11,20-trione                 |
| 403.176 | C05473 | -4.29 | 11beta,21-Dihydroxy-3,20-oxo-5beta-pregnan-18-al                                                                  |

|         |        |       |                                                                                                              |
|---------|--------|-------|--------------------------------------------------------------------------------------------------------------|
| 403.176 | C05473 | -4.3  | 11beta,21-Dihydroxy-3,20-oxo-5beta-pregnan-18-al                                                             |
| 405.096 | C00279 | -3.31 | D-Erythrose 4-phosphate                                                                                      |
| 406.185 | C04707 | -2.74 | (5Z,13E)-11alpha-Hydroxy-9,15-dioxoprost-13-enoate; (5Z)-(15S)-11alpha-Hydroxy-9,15-dioxoprost-13-enoate     |
| 406.269 | C00168 | -1.86 | Hydroxypyruvate; Hydroxypyruvic acid; 3-Hydroxypyruvate; 3-Hydroxypyruvic acid                               |
| 406.953 | C00363 | -1.69 | dTDP; Deoxythymidine 5'-diphosphate                                                                          |
| 407.092 | C05642 | -1.83 | Formyl-N-acetyl-5-methoxykynurenamine                                                                        |
| 407.202 | C00735 | -5.74 | Cortisol; Hydrocortisone; 11beta,17alpha,21-Trihydroxy-4-pregnene-3,20-dione; Kendall's compound F           |
| 407.273 | C00735 | -4.83 | Cortisol; Hydrocortisone; 11beta,17alpha,21-Trihydroxy-4-pregnene-3,20-dione; Kendall's compound F           |
| 409.218 | C05959 | -2.11 | 11-epi-Prostaglandin F2alpha; 11-epi-Prostaglandin F2a; 11-epi-PGF2alpha; 11-epi-PGF2a                       |
| 410.183 | C03640 | -2.02 | Sphingosyl-phosphocholine                                                                                    |
| 412.229 | C05452 | -1.66 | 3alpha,7alpha-Dihydroxy-5beta-cholestane; 5beta-Cholestane-3alpha,7alpha-diol                                |
| 413.047 | C00363 | -2.05 | dTDP; Deoxythymidine 5'-diphosphate                                                                          |
| 415.105 | C00255 | -1.81 | Riboflavin; Lactoflavin; 7,8-Dimethyl-10-ribitylisoalloxazine; Vitamin B2                                    |
| 416.268 | C02838 | -1.9  | L-Octanoylcarnitine                                                                                          |
| 417.159 | C05476 | -3.91 | Tetrahydrocorticosterone                                                                                     |
| 417.198 | C05476 | -3.61 | Tetrahydrocorticosterone                                                                                     |
| 418.029 | C00130 | -1.94 | IMP; Inosinic acid; Inosine monophosphate; Inosine 5'-monophosphate; Inosine 5'-phosphate; 5'-Inosinate      |
| 418.243 | C05959 | -2.88 | 11-epi-Prostaglandin F2alpha; 11-epi-Prostaglandin F2a; 11-epi-PGF2alpha; 11-epi-PGF2a                       |
| 419.176 | C00735 | -4.82 | Cortisol; Hydrocortisone; 11beta,17alpha,21-Trihydroxy-4-pregnene-3,20-dione; Kendall's compound F           |
| 420.883 | C00197 | -2.07 | 3-Phospho-D-glycerate; D-Glycerate 3-phosphate; 3-Phospho-(R)-glycerate; 3-Phosphoglycerate                  |
| 421.142 | C04717 | -2.57 | (9Z,11E)-(13S)-13-Hydroperoxyoctadeca-9,11-dienoic acid; (9Z,11E)-(13S)-13-Hydroperoxyoctadeca-9,11-dienoate |
| 421.204 | C05959 | -2.14 | 11-epi-Prostaglandin F2alpha; 11-epi-Prostaglandin F2a; 11-epi-PGF2alpha; 11-epi-PGF2a                       |
| 421.329 | C00931 | -2.48 | Porphobilinogen                                                                                              |
| 422.201 | C01301 | -2.8  | 3alpha,7alpha,12alpha-Trihydroxy-5beta-cholestan-26-al                                                       |
| 422.29  | C01301 | -2.6  | 3alpha,7alpha,12alpha-Trihydroxy-5beta-cholestan-26-al                                                       |
| 422.88  | C00197 | -3.22 | 3-Phospho-D-glycerate; D-Glycerate 3-phosphate; 3-Phospho-(R)-glycerate; 3-Phosphoglycerate                  |
| 426.22  | C04540 | -1.87 | N4-(Acetyl-beta-D-glucosaminyl)asparagine; N4-(beta-N-Acetyl-D-glucosaminyl)-L-asparagine                    |
| 428.912 | C00119 | -2.78 | 5-Phospho-alpha-D-ribose 1-diphosphate; 5-Phosphoribosyl diphosphate; 5-Phosphoribosyl 1-pyrophosphate; PRPP |
| 429.088 | C05526 | -2.82 | S-Glutathionyl-L-cysteine                                                                                    |
| 429.15  | C11695 | -2.94 | Anandamide; Arachidonylethanolamide; N-(5Z,8Z,11Z,14Z-Eicosatetraenoyl)-ethanolamine; AEA                    |
| 430.242 | C05648 | -2.35 | 5-Hydroxy-N-formylkynurenine; 5-Hydroxy-N-formyl-L-kynurenine                                                |
| 430.789 | C01301 | -2.25 | 3alpha,7alpha,12alpha-Trihydroxy-5beta-cholestan-26-al                                                       |
| 430.912 | C00119 | -2.8  | 5-Phospho-alpha-D-ribose 1-diphosphate; 5-Phosphoribosyl diphosphate; 5-Phosphoribosyl 1-pyrophosphate; PRPP |
| 431.916 | C00119 | -2.27 | 5-Phospho-alpha-D-ribose 1-diphosphate; 5-Phosphoribosyl diphosphate; 5-Phosphoribosyl 1-pyrophosphate; PRPP |
| 432.195 | C05699 | -1.7  | L-Selenocystathionine                                                                                        |
| 433.005 | C05583 | -2.78 | 3-Methoxy-4-hydroxyphenylglycolaldehyde                                                                      |
| 434.961 | C00655 | -1.82 | Xanthosine 5'-phosphate; Xanthylic acid; XMP; (9-D-Ribosylxanthine)-5'-phosphate                             |
| 435.09  | C00082 | -2.13 | L-Tyrosine; (S)-3-(p-Hydroxyphenyl)alanine; (S)-2-Amino-3-(p-hydroxyphenyl)propionic acid; Tyrosine          |
| 435.321 | C00735 | -4.9  | Cortisol; Hydrocortisone; 11beta,17alpha,21-Trihydroxy-4-pregnene-3,20-dione; Kendall's compound F           |
| 436.212 | C03640 | -1.91 | Sphingosyl-phosphocholine                                                                                    |
| 437.136 | C00624 | -2    | N-Acetyl-L-glutamate; N-Acetyl-L-glutamic acid                                                               |
| 437.334 | C05141 | -3.56 | Estriol; 1,3,5(10)-Estratriene-3,16-alpha,17beta-triol                                                       |
| 439.263 | C05454 | -2.97 | 3alpha,7alpha,12alpha-Trihydroxy-5beta-cholestane; 5beta-Cholestane-3alpha,7alpha,12alpha-triol;             |
| 439.349 | C05476 | -7.99 | Tetrahydrocorticosterone                                                                                     |
| 440.003 | C00363 | -2.18 | dTDP; Deoxythymidine 5'-diphosphate                                                                          |
| 440.257 | C05959 | -2.82 | 11-epi-Prostaglandin F2alpha; 11-epi-Prostaglandin F2a; 11-epi-PGF2alpha; 11-epi-PGF2a                       |
| 440.28  | C05454 | -3.16 | 3alpha,7alpha,12alpha-Trihydroxy-5beta-cholestane; 5beta-Cholestane-3alpha,7alpha,12alpha-triol;             |
| 440.986 | C00130 | -1.81 | IMP; Inosinic acid; Inosine monophosphate; Inosine 5'-monophosphate; Inosine 5'-phosphate; 5'-Inosinate      |
| 441.263 | C01301 | -2.84 | 3alpha,7alpha,12alpha-Trihydroxy-5beta-cholestan-26-al                                                       |
| 441.352 | C05452 | -3.86 | 3alpha,7alpha-Dihydroxy-5beta-cholestane; 5beta-Cholestane-3alpha,7alpha-diol                                |
| 442.265 | C01301 | -2.41 | 3alpha,7alpha,12alpha-Trihydroxy-5beta-cholestan-26-al                                                       |
| 442.991 | C00363 | -2    | dTDP; Deoxythymidine 5'-diphosphate                                                                          |
| 443.332 | C01190 | -1.73 | Glucosylceramide; Glucocerebroside; beta-D-Glucosyl-(1<->1)-ceramide; D-Glucosyl-N-acylsphingosine           |
| 443.332 | C05452 | -4.01 | 3alpha,7alpha-Dihydroxy-5beta-cholestane; 5beta-Cholestane-3alpha,7alpha-diol                                |
| 443.995 | C01031 | -1.72 | S-Formylglutathione                                                                                          |
| 445.222 | C02838 | -3.01 | L-Octanoylcarnitine                                                                                          |
| 445.26  | C00468 | -1.69 | Estrone; 3-Hydroxy-1,3,5(10)-estratrien-17-one                                                               |
| 446.186 | C05648 | -1.74 | 5-Hydroxy-N-formylkynurenine; 5-Hydroxy-N-formyl-L-kynurenine                                                |
| 447.241 | C05959 | -1.91 | 11-epi-Prostaglandin F2alpha; 11-epi-Prostaglandin F2a; 11-epi-PGF2alpha; 11-epi-PGF2a                       |
| 447.27  | C01301 | -4.54 | 3alpha,7alpha,12alpha-Trihydroxy-5beta-cholestan-26-al                                                       |
| 451.287 | C01301 | -2.65 | 3alpha,7alpha,12alpha-Trihydroxy-5beta-cholestan-26-al                                                       |
| 451.353 | C05138 | -3.11 | 17alpha-Hydroxypregnenolone                                                                                  |
| 452.298 | C01301 | -3.35 | 3alpha,7alpha,12alpha-Trihydroxy-5beta-cholestan-26-al                                                       |
| 452.36  | C13713 | -2.38 | Allotetrahydrodeoxycorticosterone; 5alpha-THDOC; 3alpha,21-Dihydroxy-5alpha-pregnan-20-one                   |
| 453.233 | C04707 | -4.22 | (5Z,13E)-11alpha-Hydroxy-9,15-dioxoprost-13-enoate; (5Z)-(15S)-11alpha-Hydroxy-9,15-dioxoprost-13-enoate     |
| 453.298 | C01301 | -3.51 | 3alpha,7alpha,12alpha-Trihydroxy-5beta-cholestan-26-al                                                       |
| 454.238 | C04707 | -4.22 | (5Z,13E)-11alpha-Hydroxy-9,15-dioxoprost-13-enoate; (5Z)-(15S)-11alpha-Hydroxy-9,15-dioxoprost-13-enoate     |
| 455.231 | C04707 | -4.03 | (5Z,13E)-11alpha-Hydroxy-9,15-dioxoprost-13-enoate; (5Z)-(15S)-11alpha-Hydroxy-9,15-dioxoprost-13-enoate     |
| 455.95  | C00104 | -1.99 | IDP; Inosine 5'-diphosphate; Inosine diphosphate                                                             |
| 458.344 | C16677 | -1.94 | all-trans-4-Hydroxyretinoic acid                                                                             |
| 459.275 | C06425 | -2.14 | Icosanoic acid; Eicosanoic acid; Arachidic acid                                                              |
| 459.32  | C05454 | -2.66 | 3alpha,7alpha,12alpha-Trihydroxy-5beta-cholestane; 5beta-Cholestane-3alpha,7alpha,12alpha-triol              |
| 462.966 | C00363 | -2.58 | dTDP; Deoxythymidine 5'-diphosphate                                                                          |
| 463.303 | C04707 | -4.19 | (5Z,13E)-11alpha-Hydroxy-9,15-dioxoprost-13-enoate; (5Z)-(15S)-11alpha-Hydroxy-9,15-dioxoprost-13-enoate     |
| 464.306 | C04707 | -4.99 | (5Z,13E)-11alpha-Hydroxy-9,15-dioxoprost-13-enoate; (5Z)-(15S)-11alpha-Hydroxy-9,15-dioxoprost-13-enoate     |
| 465.129 | C00081 | -2.09 | ITP; Inosine 5'-triphosphate; Inosine triphosphate; Inosine tripolyphosphate                                 |
| 465.299 | C01301 | -3.47 | 3alpha,7alpha,12alpha-Trihydroxy-5beta-cholestan-26-al                                                       |
| 466.975 | C00075 | -1.94 | UTP; Uridine 5'-triphosphate; Uridine triphosphate                                                           |
| 467.206 | C01190 | -1.67 | Glucosylceramide; Glucocerebroside; beta-D-Glucosyl-(1<->1)-ceramide; D-Glucosyl-N-acylsphingosine           |
| 468.953 | C00363 | -4.21 | dTDP; Deoxythymidine 5'-diphosphate                                                                          |
| 469.208 | C05452 | -2.62 | 3alpha,7alpha-Dihydroxy-5beta-cholestane; 5beta-Cholestane-3alpha,7alpha-diol                                |
| 469.256 | C05959 | -3.06 | 11-epi-Prostaglandin F2alpha; 11-epi-Prostaglandin F2a; 11-epi-PGF2alpha; 11-epi-PGF2a                       |
| 471.058 | C00363 | -2.64 | dTDP; Deoxythymidine 5'-diphosphate                                                                          |

|         |        |       |                                                                                                            |
|---------|--------|-------|------------------------------------------------------------------------------------------------------------|
| 471.263 | C03640 | -2.38 | Sphingosyl-phosphocholine                                                                                  |
| 471.38  | C01301 | -2.83 | 3alpha,7alpha,12alpha-Trihydroxy-5beta-cholestan-26-al                                                     |
| 473.306 | C01301 | -3.16 | 3alpha,7alpha,12alpha-Trihydroxy-5beta-cholestan-26-al                                                     |
| 473.306 | C04554 | -2.66 | 3alpha,7alpha-Dihydroxy-5beta-cholestanate; 3alpha,7alpha-Dihydroxy-5beta-cholestanoate                    |
| 473.34  | C05452 | -2.48 | 3alpha,7alpha-Dihydroxy-5beta-cholestanate; 5beta-Cholestane-3alpha,7alpha-diol                            |
| 475.256 | C02166 | -2.25 | Leukotriene C4; LTC4                                                                                       |
| 475.311 | C01301 | -3.83 | 3alpha,7alpha,12alpha-Trihydroxy-5beta-cholestan-26-al                                                     |
| 475.311 | C04554 | -4.03 | 3alpha,7alpha-Dihydroxy-5beta-cholestanate; 3alpha,7alpha-Dihydroxy-5beta-cholestanoate                    |
| 476.292 | C00735 | -2.82 | Cortisol; Hydrocortisone; 11beta,17alpha,21-Trihydroxy-4-pregnene-3,20-dione; Kendall's compound F         |
| 476.308 | C05454 | -2.5  | 3alpha,7alpha,12alpha-Trihydroxy-5beta-cholestanate; 5beta-Cholestane-3alpha,7alpha,12alpha-triol;         |
| 477.11  | C00049 | -2.02 | L-Aspartate; L-Aspartic acid; 2-Aminosuccinic acid; L-Asp                                                  |
| 477.274 | C01301 | -2.3  | 3alpha,7alpha,12alpha-Trihydroxy-5beta-cholestan-26-al                                                     |
| 478.327 | C00168 | -1.91 | Hydroxypyruvate; Hydroxypyruvic acid; 3-Hydroxypyruvate; 3-Hydroxypyruvic acid                             |
| 479.33  | C00762 | -2.58 | Cortisone; 17alpha,21-Dihydroxy-4-pregnene-3,11,20-trione; Kendall's compound E; Reichstein's substance Fa |
| 480.231 | C05452 | -3.23 | 3alpha,7alpha-Dihydroxy-5beta-cholestanate; 5beta-Cholestane-3alpha,7alpha-diol                            |
| 480.278 | C01190 | -1.83 | Glucosylceramide; Glucocerebroside; beta-D-Glucosyl-(1<->1)-ceramide; D-Glucosyl-N-acylsphingosine         |
| 481.15  | C01051 | -3.22 | Uroporphyrinogen III                                                                                       |
| 481.346 | C05138 | -2.96 | 17alpha-Hydroxypregnenolone                                                                                |
| 483.299 | C03640 | -2.16 | Sphingosyl-phosphocholine                                                                                  |
| 485.293 | C02838 | -3.15 | L-Octanoylcarnitine                                                                                        |
| 489.333 | C01190 | -1.97 | Glucosylceramide; Glucocerebroside; beta-D-Glucosyl-(1<->1)-ceramide; D-Glucosyl-N-acylsphingosine         |
| 490.334 | C01190 | -1.72 | Glucosylceramide; Glucocerebroside; beta-D-Glucosyl-(1<->1)-ceramide; D-Glucosyl-N-acylsphingosine         |
| 490.334 | C03701 | -2.09 | Glycosyl-N-acylsphingosine                                                                                 |
| 490.963 | C00460 | -1.95 | dUTP; 2'-Deoxyuridine 5'-triphosphate                                                                      |
| 491.293 | C05138 | -1.79 | 17alpha-Hydroxypregnenolone                                                                                |
| 493.277 | C01301 | -3.1  | 3alpha,7alpha,12alpha-Trihydroxy-5beta-cholestan-26-al                                                     |
| 495.307 | C04707 | -1.92 | (5Z,13E)-11alpha-Hydroxy-9,15-dioxoprost-13-enoate; (5Z)-(15S)-11alpha-Hydroxy-9,15-dioxoprost-13-enoate   |
| 497.259 | C04707 | -4.2  | (5Z,13E)-11alpha-Hydroxy-9,15-dioxoprost-13-enoate; (5Z)-(15S)-11alpha-Hydroxy-9,15-dioxoprost-13-enoate   |
| 501.363 | C05452 | -4.2  | 3alpha,7alpha-Dihydroxy-5beta-cholestanate; 5beta-Cholestane-3alpha,7alpha-diol                            |
| 502.367 | C06425 | -2.19 | Icosanoic acid; Eicosanoic acid; Arachidic acid                                                            |
| 503.235 | C00169 | -3.2  | Carbamoyl phosphate                                                                                        |
| 503.316 | C05452 | -2.24 | 3alpha,7alpha-Dihydroxy-5beta-cholestanate; 5beta-Cholestane-3alpha,7alpha-diol                            |
| 503.421 | C00212 | -2.89 | Adenosine                                                                                                  |
| 506.308 | C03640 | -2.37 | Sphingosyl-phosphocholine                                                                                  |
| 506.308 | C03640 | -2.51 | Sphingosyl-phosphocholine                                                                                  |
| 506.308 | C03640 | -2.62 | Sphingosyl-phosphocholine                                                                                  |
| 507.05  | C00167 | -2.03 | UDP-glucuronate; UDPglucuronate; UDP-D-glucuronate; UDP-alpha-D-glucuronate                                |
| 507.329 | C03640 | -1.87 | Sphingosyl-phosphocholine                                                                                  |
| 508.332 | C03640 | -2.26 | Sphingosyl-phosphocholine                                                                                  |
| 509.329 | C01301 | -2.54 | 3alpha,7alpha,12alpha-Trihydroxy-5beta-cholestan-26-al                                                     |
| 510.252 | C05959 | -2.72 | 11-epi-Prostaglandin F2alpha; 11-epi-Prostaglandin F2a; 11-epi-PGF2alpha; 11-epi-PGF2a                     |
| 511.146 | C00664 | -2.7  | 5-Formiminotetrahydrofolate; 5-Formimidoyltetrahydrofolate                                                 |
| 511.274 | C04707 | -2.74 | (5Z,13E)-11alpha-Hydroxy-9,15-dioxoprost-13-enoate; (5Z)-(15S)-11alpha-Hydroxy-9,15-dioxoprost-13-enoate   |
| 511.345 | C01301 | -4.33 | 3alpha,7alpha,12alpha-Trihydroxy-5beta-cholestan-26-al                                                     |
| 513.316 | C14772 | -1.96 | 5,6-DHET; (8Z,11Z,14Z)-5,6-Dihydroxyeicosa-8,11,14-trienoic acid                                           |
| 515.298 | C04707 | -1.66 | (5Z,13E)-11alpha-Hydroxy-9,15-dioxoprost-13-enoate; (5Z)-(15S)-11alpha-Hydroxy-9,15-dioxoprost-13-enoate   |
| 517.03  | C00295 | -2.38 | Orotate; Orotic acid; Uracil-6-carboxylic acid                                                             |
| 517.237 | C01301 | -3.06 | 3alpha,7alpha,12alpha-Trihydroxy-5beta-cholestan-26-al                                                     |
| 518.248 | C05922 | -2.46 | Formamidopyrimidine nucleoside triphosphate                                                                |
| 519.263 | C02165 | -2.06 | Leukotriene B4; (6Z,8E,10E,14Z)-(5S,12R)-5,12-Dihydroxyeicosa-6,8,10,14-tetraenoate                        |
| 524.257 | C05452 | -3.87 | 3alpha,7alpha-Dihydroxy-5beta-cholestanate; 5beta-Cholestane-3alpha,7alpha-diol                            |
| 524.303 | C03640 | -1.7  | Sphingosyl-phosphocholine                                                                                  |
| 524.932 | C01024 | -2.58 | Hydroxymethylbilane                                                                                        |
| 527.257 | C04540 | -2.15 | N4-(Acetyl-beta-D-glucosaminyl)asparagine; N4-(beta-N-Acetyl-D-glucosaminyl)-L-asparagine                  |
| 529.989 | C00286 | -2.79 | dGTP; 2'-Deoxyguanosine 5'-triphosphate; Deoxyguanosine 5'-triphosphate; Deoxyguanosine triphosphate       |
| 530.972 | C00081 | -3.53 | ITP; Inosine 5'-triphosphate; Inosine triphosphate; Inosine tripolyphosphate                               |
| 533.41  | C05454 | -2.74 | 3alpha,7alpha,12alpha-Trihydroxy-5beta-cholestanate; 5beta-Cholestane-3alpha,7alpha,12alpha-triol          |
| 533.966 | C00049 | -2.24 | L-Aspartate; L-Aspartic acid; 2-Aminosuccinic acid; L-Asp                                                  |
| 535.453 | C06425 | -2.23 | Icosanoic acid; Eicosanoic acid; Arachidic acid                                                            |
| 539.169 | C00363 | -3.14 | dTDP; Deoxythymidine 5'-diphosphate                                                                        |
| 543.286 | C04707 | -2.56 | (5Z,13E)-11alpha-Hydroxy-9,15-dioxoprost-13-enoate; (5Z)-(15S)-11alpha-Hydroxy-9,15-dioxoprost-13-enoate   |
| 545.511 | C00363 | -1.69 | dTDP; Deoxythymidine 5'-diphosphate                                                                        |
| 547.019 | C05922 | -2.09 | Formamidopyrimidine nucleoside triphosphate                                                                |
| 549.056 | C00363 | -2.11 | dTDP; Deoxythymidine 5'-diphosphate                                                                        |
| 550.287 | C01228 | -2.2  | Guanosine 3',5'-bis(diphosphate); Guanosine 3'-diphosphate 5'-diphosphate                                  |
| 551.015 | C05922 | -2.3  | Formamidopyrimidine nucleoside triphosphate                                                                |
| 551.355 | C04707 | -3.76 | (5Z,13E)-11alpha-Hydroxy-9,15-dioxoprost-13-enoate; (5Z)-(15S)-11alpha-Hydroxy-9,15-dioxoprost-13-enoate   |
| 552.274 | C04707 | -2.42 | (5Z,13E)-11alpha-Hydroxy-9,15-dioxoprost-13-enoate; (5Z)-(15S)-11alpha-Hydroxy-9,15-dioxoprost-13-enoate   |
| 552.358 | C01301 | -4.03 | 3alpha,7alpha,12alpha-Trihydroxy-5beta-cholestan-26-al                                                     |
| 555.143 | C01228 | -1.99 | Guanosine 3',5'-bis(diphosphate); Guanosine 3'-diphosphate 5'-diphosphate                                  |
| 556.07  | C00049 | -1.79 | L-Aspartate; L-Aspartic acid; 2-Aminosuccinic acid; L-Asp                                                  |
| 557.307 | C01228 | -2.58 | Guanosine 3',5'-bis(diphosphate); Guanosine 3'-diphosphate 5'-diphosphate                                  |
| 558.378 | C02166 | -2.47 | Leukotriene C4; LTC4                                                                                       |
| 558.439 | C03640 | -2.26 | Sphingosyl-phosphocholine                                                                                  |
| 559.438 | C04707 | -2.42 | (5Z,13E)-11alpha-Hydroxy-9,15-dioxoprost-13-enoate; (5Z)-(15S)-11alpha-Hydroxy-9,15-dioxoprost-13-enoate   |
| 561.086 | C00049 | -3.13 | L-Aspartate; L-Aspartic acid; 2-Aminosuccinic acid; L-Asp                                                  |
| 561.935 | C01228 | -2.2  | Guanosine 3',5'-bis(diphosphate); Guanosine 3'-diphosphate 5'-diphosphate                                  |
| 563.361 | C03640 | -2.13 | Sphingosyl-phosphocholine                                                                                  |
| 565.322 | C01190 | -1.71 | Glucosylceramide; Glucocerebroside; beta-D-Glucosyl-(1<->1)-ceramide                                       |
| 566.02  | C00049 | -2.6  | L-Aspartate; L-Aspartic acid; 2-Aminosuccinic acid; L-Asp                                                  |
| 567.024 | C00190 | -1.96 | UDP-D-xylose; UDP-xylose; UDP-alpha-D-xylose                                                               |
| 569.087 | C04392 | -1.73 | P1,P4-Bis(5'-xanthosyl) tetraphosphate; XppppX                                                             |
| 569.316 | C01301 | -3.45 | 3alpha,7alpha,12alpha-Trihydroxy-5beta-cholestan-26-al                                                     |



|         |        |       |                                                                                                            |
|---------|--------|-------|------------------------------------------------------------------------------------------------------------|
| 571.036 | C00130 | -2.18 | IMP; Inosinic acid; Inosine monophosphate; Inosine 5'-monophosphate; Inosine 5'-phosphate; 5'-Inosinate    |
| 572.022 | C00075 | -2.95 | UTP; Uridine 5'-triphosphate; Uridine triphosphate                                                         |
| 575.009 | C00190 | -2.79 | UDP-D-xylose; UDP-xylose; UDP-alpha-D-xylose                                                               |
| 578.052 | C05922 | -1.91 | Formamidopyrimidine nucleoside triphosphate                                                                |
| 579.048 | C05692 | -2.1  | Se-Adenosyl-L-selenohomocysteine; Se-Adenosylselenohomocysteine                                            |
| 579.96  | C05922 | -2.13 | Formamidopyrimidine nucleoside triphosphate                                                                |
| 580.999 | C00300 | -2.98 | Creatine; alpha-Methylguanidino acetic acid; Methylglycocyanine                                            |
| 581.371 | C06425 | -2.1  | Icosanoic acid; Eicosanoic acid; Arachidic acid                                                            |
| 581.966 | C05922 | -3.17 | Formamidopyrimidine nucleoside triphosphate                                                                |
| 581.966 | C05922 | -3.19 | Formamidopyrimidine nucleoside triphosphate                                                                |
| 582.306 | C01228 | -2.35 | Guanosine 3',5'-bis(diphosphate); Guanosine 3'-diphosphate 5'-diphosphate                                  |
| 586.025 | C05922 | -3.14 | Formamidopyrimidine nucleoside triphosphate                                                                |
| 587.965 | C03680 | -3.32 | 4-Imidazolone-5-propanoate; 4-Imidazolone-5-propionic acid; 4,5-Dihydro-4-oxo-5-imidazolepropanoate        |
| 589.036 | C00075 | -2.13 | UTP; Uridine 5'-triphosphate; Uridine triphosphate                                                         |
| 591.256 | C00363 | -3.39 | dTDP; Deoxythymidine 5'-diphosphate                                                                        |
| 597.262 | C03263 | -2.09 | Coproporphyrinogen III                                                                                     |
| 601.463 | C04707 | -2.09 | (5Z,13E)-11alpha-Hydroxy-9,15-dioxoprost-13-enoate; (5Z)-(15S)-11alpha-Hydroxy-9,15-dioxoprost-13-enoate   |
| 602.466 | C04707 | -2.5  | (5Z,13E)-11alpha-Hydroxy-9,15-dioxoprost-13-enoate; (5Z)-(15S)-11alpha-Hydroxy-9,15-dioxoprost-13-enoate   |
| 609.264 | C16641 | -3.14 | Irinotecan                                                                                                 |
| 609.272 | C02166 | -1.87 | Leukotriene C4; LTC4                                                                                       |
| 613.054 | C01051 | -1.89 | Uroporphyrinogen III                                                                                       |
| 614.184 | C00075 | -2.2  | UTP; Uridine 5'-triphosphate; Uridine triphosphate                                                         |
| 616.302 | C05922 | -1.99 | Formamidopyrimidine nucleoside triphosphate                                                                |
| 618.993 | C00167 | -1.68 | UDP-glucuronate; UDPglucuronate; UDP-D-glucuronate; UDP-alpha-D-glucuronate                                |
| 619.057 | C08565 | -2.01 | Portulacaxanthin II                                                                                        |
| 619.136 | C02166 | -1.75 | Leukotriene C4; LTC4                                                                                       |
| 620.353 | C00042 | -2.12 | Succinate; Succinic acid; Butanedionic acid; Ethylenesuccinic acid                                         |
| 621.34  | C03640 | -2.79 | Sphingosyl-phosphocholine                                                                                  |
| 622.344 | C01079 | -2.15 | Protoporphyrinogen IX                                                                                      |
| 623.271 | C16641 | -2.72 | Irinotecan                                                                                                 |
| 623.301 | C00167 | -1.71 | UDP-glucuronate; UDPglucuronate; UDP-D-glucuronate; UDP-alpha-D-glucuronate                                |
| 629.799 | C03263 | -2.62 | Coproporphyrinogen III                                                                                     |
| 633.267 | C03263 | -3.24 | Coproporphyrinogen III                                                                                     |
| 636.274 | C16641 | -2.5  | Irinotecan                                                                                                 |
| 641.017 | C00075 | -3.18 | UTP; Uridine 5'-triphosphate; Uridine triphosphate                                                         |
| 641.254 | C00486 | -2.13 | Bilirubin                                                                                                  |
| 641.274 | C03263 | -2.96 | Coproporphyrinogen III                                                                                     |
| 641.922 | C01228 | -2.01 | Guanosine 3',5'-bis(diphosphate); Guanosine 3'-diphosphate 5'-diphosphate                                  |
| 643.245 | C00239 | -1.76 | dCMP; Deoxycytidylic acid; Deoxycytidine monophosphate; Deoxycytidylate; 2'-Deoxycytidine 5'-monophosphate |
| 643.264 | C03263 | -2.45 | Coproporphyrinogen III                                                                                     |
| 645.201 | C16641 | -1.84 | Irinotecan                                                                                                 |
| 645.417 | C02990 | -3.66 | L-Palmitoylcarnitine                                                                                       |
| 649.096 | C01024 | -1.71 | Hydroxymethylbilane                                                                                        |
| 650.235 | C01051 | -2.87 | Uroporphyrinogen III                                                                                       |
| 651.257 | C00167 | -2.01 | UDP-glucuronate; UDPglucuronate; UDP-D-glucuronate; UDP-alpha-D-glucuronate                                |
| 652.247 | C04886 | -1.75 | alpha-N-Acetylneuraminyl-2,6-beta-D-galactosyl-1,4-N-acetyl-beta-D-glucosamine                             |
| 652.773 | C04856 | -2.69 | (6S)-6beta-Hydroxy-1,4,5,6-tetrahydronicotinamide-adenine dinucleotide; (S)-NADH-hydrate                   |
| 654.303 | C03263 | -2.87 | Coproporphyrinogen III                                                                                     |
| 655.237 | C03263 | -3.29 | Coproporphyrinogen III                                                                                     |
| 656.249 | C03263 | -2.61 | Coproporphyrinogen III                                                                                     |
| 658.238 | C01051 | -2.28 | Uroporphyrinogen III                                                                                       |
| 658.245 | C03263 | -1.71 | Coproporphyrinogen III                                                                                     |
| 659.235 | C01051 | -2.73 | Uroporphyrinogen III                                                                                       |
| 661.271 | C09332 | -1.82 | THF-L-glutamate; Tetrahydropteroyldiglutamate; (6S)-H4PteGlu2                                              |
| 661.321 | C03263 | -2.51 | Coproporphyrinogen III                                                                                     |
| 661.321 | C05768 | -2.03 | Coproporphyrinogen I                                                                                       |
| 662.272 | C03263 | -2.42 | Coproporphyrinogen III                                                                                     |
| 666.259 | C04392 | -2.94 | P1,P4-Bis(5'-xanthosyl) tetraphosphate; XppppX                                                             |
| 666.277 | C01051 | -2.29 | Uroporphyrinogen III                                                                                       |
| 667.198 | C05922 | -2.26 | Formamidopyrimidine nucleoside triphosphate                                                                |
| 668.277 | C06198 | -2.45 | P1,P4-Bis(5'-uridyl) tetraphosphate; UppppU                                                                |
| 669.229 | C00049 | -1.7  | L-Aspartate; L-Aspartic acid; 2-Aminosuccinic acid; L-Asp                                                  |
| 669.293 | C03263 | -2.49 | Coproporphyrinogen III                                                                                     |
| 670.289 | C01051 | -2.43 | Uroporphyrinogen III                                                                                       |
| 673.244 | C04886 | -1.73 | alpha-N-Acetylneuraminyl-2,6-beta-D-galactosyl-1,4-N-acetyl-beta-D-glucosamine                             |
| 673.364 | C04707 | -1.72 | (5Z,13E)-11alpha-Hydroxy-9,15-dioxoprost-13-enoate; (5Z)-(15S)-11alpha-Hydroxy-9,15-dioxoprost-13-enoate   |
| 674.243 | C03263 | -3.4  | Coproporphyrinogen III                                                                                     |
| 674.255 | C03263 | -2.23 | Coproporphyrinogen III                                                                                     |
| 675.224 | C03263 | -2    | Coproporphyrinogen III                                                                                     |
| 676.225 | C04856 | -2.67 | (6S)-6beta-Hydroxy-1,4,5,6-tetrahydronicotinamide-adenine dinucleotide; (S)-NADH-hydrate; (S)-NADHX        |
| 676.297 | C03263 | -1.95 | Coproporphyrinogen III                                                                                     |
| 677.225 | C03263 | -3.1  | Coproporphyrinogen III                                                                                     |
| 677.249 | C03263 | -1.85 | Coproporphyrinogen III                                                                                     |
| 677.278 | C03263 | -2.95 | Coproporphyrinogen III                                                                                     |
| 678.252 | C06198 | -3.35 | P1,P4-Bis(5'-uridyl) tetraphosphate; UppppU                                                                |
| 683.192 | C00049 | -1.96 | L-Aspartate; L-Aspartic acid; 2-Aminosuccinic acid; L-Asp                                                  |
| 684.282 | C03263 | -2.89 | Coproporphyrinogen III                                                                                     |
| 687.252 | C03263 | -1.76 | Coproporphyrinogen III                                                                                     |
| 687.375 | C01079 | -2.05 | Protoporphyrinogen IX                                                                                      |
| 688.285 | C03263 | -3.1  | Coproporphyrinogen III                                                                                     |
| 689.253 | C03263 | -1.69 | Coproporphyrinogen III                                                                                     |
| 690.26  | C03263 | -2.54 | Coproporphyrinogen III                                                                                     |
| 691.276 | C00337 | -2.45 | (S)-Dihydroorotate; (S)-4,5-Dihydroorotate; L-Dihydroorotate; L-Dihydroorotic acid; Dihydro-L-orotic acid  |

|         |        |       |                                                                                                            |
|---------|--------|-------|------------------------------------------------------------------------------------------------------------|
| 691.76  | C01944 | -2.05 | Octanoyl-CoA                                                                                               |
| 692.157 | C04540 | -1.98 | N4-(Acetyl-beta-D-glucosaminyl)asparagine; N4-(beta-N-Acetyl-D-glucosaminyl)-L-asparagine                  |
| 692.225 | C01051 | -2.5  | Uroporphyrinogen III                                                                                       |
| 693.381 | C03263 | -1.74 | Coproporphyrinogen III                                                                                     |
| 693.631 | C01352 | -2.13 | FADH2                                                                                                      |
| 694.261 | C03263 | -1.91 | Coproporphyrinogen III                                                                                     |
| 695.264 | C03263 | -1.94 | Coproporphyrinogen III                                                                                     |
| 695.338 | C03263 | -1.93 | Coproporphyrinogen III                                                                                     |
| 696.335 | C03263 | -2.1  | Coproporphyrinogen III                                                                                     |
| 697.269 | C03263 | -3.57 | Coproporphyrinogen III                                                                                     |
| 699.278 | C03263 | -3.02 | Coproporphyrinogen III                                                                                     |
| 699.278 | C05768 | -2.78 | Coproporphyrinogen I                                                                                       |
| 700.269 | C03263 | -1.89 | Coproporphyrinogen III                                                                                     |
| 701.235 | C03263 | -2.51 | Coproporphyrinogen III                                                                                     |
| 704.356 | C00075 | -1.98 | UTP; Uridine 5'-triphosphate; Uridine triphosphate                                                         |
| 705.235 | C03263 | -1.82 | Coproporphyrinogen III                                                                                     |
| 705.321 | C03263 | -3.72 | Coproporphyrinogen III                                                                                     |
| 705.349 | C01228 | -3.89 | Guanosine 3',5'-bis(diphosphate); Guanosine 3'-diphosphate 5'-diphosphate                                  |
| 706.235 | C03263 | -2.66 | Coproporphyrinogen III                                                                                     |
| 706.326 | C03263 | -2.52 | Coproporphyrinogen III                                                                                     |
| 707.251 | C03263 | -2.48 | Coproporphyrinogen III                                                                                     |
| 709.22  | C03263 | -2.28 | Coproporphyrinogen III                                                                                     |
| 709.245 | C00167 | -2.09 | UDP-glucuronate; UDPglucuronate; UDP-D-glucuronate; UDP-alpha-D-glucuronate                                |
| 709.263 | C17234 | -1.93 | 2-Aminobut-2-enoate; (2Z)-2-Aminobut-2-enoic acid; 2-Ammoniobut-2-enoate                                   |
| 709.394 | C01228 | -1.69 | Guanosine 3',5'-bis(diphosphate); Guanosine 3'-diphosphate 5'-diphosphate                                  |
| 710.142 | C02305 | -1.9  | Phosphocreatine; N-Phosphocreatine; Creatine phosphate                                                     |
| 710.251 | C03263 | -2.16 | Coproporphyrinogen III                                                                                     |
| 711.231 | C04392 | -2.02 | P1,P4-Bis(5'-xanthosyl) tetraphosphate; XppppX                                                             |
| 711.247 | C04392 | -2.88 | P1,P4-Bis(5'-xanthosyl) tetraphosphate; XppppX                                                             |
| 712.312 | C03263 | -3.62 | Coproporphyrinogen III                                                                                     |
| 713.255 | C04392 | -2.39 | P1,P4-Bis(5'-xanthosyl) tetraphosphate; XppppX                                                             |
| 713.31  | C03263 | -3.49 | Coproporphyrinogen III                                                                                     |
| 714.302 | C03263 | -2.82 | Coproporphyrinogen III                                                                                     |
| 718.196 | C00100 | -2.85 | Propanoyl-CoA; Propionyl-CoA; Propionyl coenzyme A                                                         |
| 718.279 | C00379 | -1.85 | Xylitol                                                                                                    |
| 720.291 | C00049 | -1.98 | L-Aspartate; L-Aspartic acid; 2-Aminosuccinic acid; L-Asp                                                  |
| 721.325 | C05922 | -1.81 | Formamidopyrimidine nucleoside triphosphate                                                                |
| 721.396 | C04540 | -2.18 | N4-(Acetyl-beta-D-glucosaminyl)asparagine; N4-(beta-N-Acetyl-D-glucosaminyl)-L-asparagine                  |
| 724.25  | C01051 | -2.14 | Uroporphyrinogen III                                                                                       |
| 724.319 | C03263 | -2.97 | Coproporphyrinogen III                                                                                     |
| 725.233 | C16470 | -1.73 | 5-Methylhex-4-enoyl-CoA                                                                                    |
| 725.997 | C00049 | -2.06 | L-Aspartate; L-Aspartic acid; 2-Aminosuccinic acid; L-Asp                                                  |
| 726.315 | C01228 | -2.12 | Guanosine 3',5'-bis(diphosphate); Guanosine 3'-diphosphate 5'-diphosphate                                  |
| 727.383 | C05922 | -1.75 | Formamidopyrimidine nucleoside triphosphate                                                                |
| 728.223 | C01051 | -1.74 | Uroporphyrinogen III                                                                                       |
| 729.234 | C04392 | -2.47 | P1,P4-Bis(5'-xanthosyl) tetraphosphate; XppppX                                                             |
| 729.291 | C06198 | -1.86 | P1,P4-Bis(5'-uridylyl) tetraphosphate; UppppU                                                              |
| 729.337 | C00190 | -2.58 | UDP-D-xylose; UDP-xylose; UDP-alpha-D-xylose                                                               |
| 730.229 | C01051 | -2.84 | Uroporphyrinogen III                                                                                       |
| 730.29  | C01051 | -2.28 | Uroporphyrinogen III                                                                                       |
| 730.368 | C00190 | -2.64 | UDP-D-xylose; UDP-xylose; UDP-alpha-D-xylose                                                               |
| 732.286 | C00882 | -2.54 | Dephospho-CoA; Dephosphocoenzyme A; 3'-Dephospho-CoA                                                       |
| 733.164 | C00190 | -2.21 | UDP-D-xylose; UDP-xylose; UDP-alpha-D-xylose                                                               |
| 734.313 | C01024 | -2.62 | Hydroxymethylbilane                                                                                        |
| 735.267 | C04886 | -1.68 | alpha-N-Acetylneuraminy-2,6-beta-D-galactosyl-1,4-N-acetyl-beta-D-glucosamine                              |
| 737.277 | C00049 | -3.26 | L-Aspartate; L-Aspartic acid; 2-Aminosuccinic acid; L-Asp                                                  |
| 737.628 | C04899 | -2.49 | (6S)-6beta-Hydroxy-1,4,5,6-tetrahydronicotinamide-adenine dinucleotide phosphate; (S)-NADPH-hydrate        |
| 738.323 | C03263 | -2.04 | Coproporphyrinogen III                                                                                     |
| 738.365 | C03263 | -2.71 | Coproporphyrinogen III                                                                                     |
| 739.312 | C03263 | -3.06 | Coproporphyrinogen III                                                                                     |
| 740.831 | C00547 | -1.83 | L-Noradrenaline; Noradrenaline; Norepinephrine; Arterenol; 4-[(1R)-2-Amino-1-hydroxyethyl]-1,2-benzenediol |
| 742.22  | C00100 | -2.23 | Propanoyl-CoA; Propionyl-CoA; Propionyl coenzyme A                                                         |
| 743.251 | C06198 | -2.26 | P1,P4-Bis(5'-uridylyl) tetraphosphate; UppppU                                                              |
| 743.995 | C05922 | -2.36 | Formamidopyrimidine nucleoside triphosphate                                                                |
| 744.257 | C03263 | -2.43 | Coproporphyrinogen III                                                                                     |
| 745.219 | C01051 | -2.47 | Uroporphyrinogen III                                                                                       |
| 745.26  | C03263 | -1.95 | Coproporphyrinogen III                                                                                     |
| 745.306 | C03263 | -3.4  | Coproporphyrinogen III                                                                                     |
| 746.213 | C01051 | -2.25 | Uroporphyrinogen III                                                                                       |
| 747.21  | C01051 | -2.57 | Uroporphyrinogen III                                                                                       |
| 749.011 | C05922 | -2.3  | Formamidopyrimidine nucleoside triphosphate                                                                |
| 749.179 | C01051 | -3.02 | Uroporphyrinogen III                                                                                       |
| 749.203 | C04392 | -2.13 | P1,P4-Bis(5'-xanthosyl) tetraphosphate; XppppX                                                             |
| 749.31  | C03263 | -3.35 | Coproporphyrinogen III                                                                                     |
| 751.185 | C01260 | -2.16 | P1,P4-Bis(5'-adenosyl)tetraphosphate; AppppA                                                               |
| 752.108 | C16470 | -2.39 | 5-Methylhex-4-enoyl-CoA                                                                                    |
| 753.252 | C01944 | -2.35 | Octanoyl-CoA                                                                                               |
| 754.26  | C01944 | -1.74 | Octanoyl-CoA                                                                                               |
| 755.341 | C01228 | -2.06 | Guanosine 3',5'-bis(diphosphate); Guanosine 3'-diphosphate 5'-diphosphate                                  |
| 756.302 | C01024 | -1.82 | Hydroxymethylbilane                                                                                        |
| 756.338 | C06198 | -2.99 | P1,P4-Bis(5'-uridylyl) tetraphosphate; UppppU                                                              |
| 757.349 | C01228 | -1.99 | Guanosine 3',5'-bis(diphosphate); Guanosine 3'-diphosphate 5'-diphosphate                                  |
| 758.295 | C01024 | -2    | Hydroxymethylbilane                                                                                        |

|         |        |       |                                                                                                     |
|---------|--------|-------|-----------------------------------------------------------------------------------------------------|
| 759.244 | C01051 | -1.84 | Uroporphyrinogen III                                                                                |
| 760.232 | C04899 | -1.91 | (6S)-6beta-Hydroxy-1,4,5,6-tetrahydronicotinamide-adenine dinucleotide phosphate; (S)-NADPH-hydrate |
| 761.219 | C01217 | -1.71 | 5,6,7,8-Tetrahydromethanopterin; H4MPT; THMPT; Tetrahydromethanopterin                              |
| 761.246 | C01051 | -2.28 | Uroporphyrinogen III                                                                                |
| 761.283 | C01024 | -1.66 | Hydroxymethylbilane                                                                                 |
| 761.306 | C06198 | -2.98 | P1,P4-Bis(5'-uridyl) tetraphosphate; UppppU                                                         |
| 762.224 | C01051 | -1.91 | Uroporphyrinogen III                                                                                |
| 762.269 | C06198 | -1.94 | P1,P4-Bis(5'-uridyl) tetraphosphate; UppppU                                                         |
| 764.25  | C16470 | -2.35 | 5-Methylhex-4-enoyl-CoA                                                                             |
| 765.276 | C01051 | -2.45 | Uroporphyrinogen III                                                                                |
| 766.182 | C00882 | -1.91 | Dephospho-CoA; Dephosphocoenzyme A; 3'-Dephospho-CoA                                                |
| 766.196 | C00024 | -2.09 | Acetyl-CoA; Acetyl coenzyme A                                                                       |
| 766.238 | C01024 | -1.84 | Hydroxymethylbilane                                                                                 |
| 766.288 | C06198 | -2.59 | P1,P4-Bis(5'-uridyl) tetraphosphate; UppppU                                                         |
| 767.191 | C06198 | -1.75 | P1,P4-Bis(5'-uridyl) tetraphosphate; UppppU                                                         |
| 767.262 | C06198 | -2.33 | P1,P4-Bis(5'-uridyl) tetraphosphate; UppppU                                                         |
| 767.706 | C01260 | -1.82 | P1,P4-Bis(5'-adenosyl)tetraphosphate; AppppA                                                        |
| 769.177 | C00100 | -2.74 | Propanoyl-CoA; Propionyl-CoA; Propionyl coenzyme A                                                  |
| 770.183 | C01352 | -1.92 | FADH2                                                                                               |
| 771.182 | C01352 | -3.56 | FADH2                                                                                               |
| 776.431 | C00500 | -3.02 | Biliverdin; Biliverdin IX alpha                                                                     |
| 777.266 | C04392 | -2.44 | P1,P4-Bis(5'-xanthosyl) tetraphosphate; XppppX                                                      |
| 778.287 | C06198 | -2.01 | P1,P4-Bis(5'-uridyl) tetraphosphate; UppppU                                                         |
| 778.305 | C06198 | -1.83 | P1,P4-Bis(5'-uridyl) tetraphosphate; UppppU                                                         |
| 779.304 | C06198 | -3.15 | P1,P4-Bis(5'-uridyl) tetraphosphate; UppppU                                                         |
| 780.171 | C00024 | -2.94 | Acetyl-CoA; Acetyl coenzyme A                                                                       |
| 780.256 | C16470 | -2.25 | 5-Methylhex-4-enoyl-CoA                                                                             |
| 780.338 | C01051 | -2.89 | Uroporphyrinogen III                                                                                |
| 781.288 | C01217 | -2.05 | 5,6,7,8-Tetrahydromethanopterin; H4MPT; THMPT; Tetrahydromethanopterin                              |
| 781.329 | C01051 | -3.13 | Uroporphyrinogen III                                                                                |
| 782.376 | C04377 | -1.81 | 5,10-Methylenetetrahydromethanopterin; N5,N10-Methylenetetrahydromethanopterin                      |
| 783.263 | C01352 | -2.68 | FADH2                                                                                               |
| 783.275 | C00049 | -2.04 | L-Aspartate; L-Aspartic acid; 2-Aminosuccinic acid; L-Asp                                           |
| 784.418 | C04377 | -1.75 | 5,10-Methylenetetrahydromethanopterin; N5,N10-Methylenetetrahydromethanopterin                      |
| 786.135 | C00016 | -3.92 | FAD; Flavin adenine dinucleotide                                                                    |
| 787.248 | C01051 | -3.2  | Uroporphyrinogen III                                                                                |
| 788.185 | C00100 | -1.67 | Propanoyl-CoA; Propionyl-CoA; Propionyl coenzyme A                                                  |
| 788.237 | C01352 | -2.27 | FADH2                                                                                               |
| 789.178 | C01352 | -1.92 | FADH2                                                                                               |
| 789.206 | C01352 | -3.58 | FADH2                                                                                               |
| 789.271 | C06198 | -2.26 | P1,P4-Bis(5'-uridyl) tetraphosphate; UppppU                                                         |
| 790.183 | C01352 | -3.03 | FADH2                                                                                               |
| 790.269 | C06198 | -2.31 | P1,P4-Bis(5'-uridyl) tetraphosphate; UppppU                                                         |
| 790.313 | C01217 | -1.74 | 5,6,7,8-Tetrahydromethanopterin; H4MPT; THMPT; Tetrahydromethanopterin                              |
| 791.211 | C00024 | -3.3  | Acetyl-CoA; Acetyl coenzyme A                                                                       |
| 791.267 | C01051 | -1.85 | Uroporphyrinogen III                                                                                |
| 791.289 | C06198 | -3.57 | P1,P4-Bis(5'-uridyl) tetraphosphate; UppppU                                                         |
| 791.413 | C00097 | -1.89 | L-Cysteine; L-2-Amino-3-mercaptopropionic acid                                                      |
| 792.288 | C06198 | -1.73 | P1,P4-Bis(5'-uridyl) tetraphosphate; UppppU                                                         |
| 794.272 | C06198 | -2.56 | P1,P4-Bis(5'-uridyl) tetraphosphate; UppppU                                                         |
| 795.308 | C11134 | -2.18 | Testosterone glucuronide; Testosterone 17beta-(beta-D-glucuronide)                                  |
| 796.16  | C00024 | -2.57 | Acetyl-CoA; Acetyl coenzyme A                                                                       |
| 796.311 | C01051 | -2.2  | Uroporphyrinogen III                                                                                |
| 797.194 | C00882 | -2.07 | Dephospho-CoA; Dephosphocoenzyme A; 3'-Dephospho-CoA                                                |
| 797.237 | C01944 | -3.05 | Octanoyl-CoA                                                                                        |
| 798.18  | C01352 | -1.81 | FADH2                                                                                               |
| 798.195 | C00024 | -2.21 | Acetyl-CoA; Acetyl coenzyme A                                                                       |
| 798.235 | C01217 | -1.87 | 5,6,7,8-Tetrahydromethanopterin; H4MPT; THMPT; Tetrahydromethanopterin                              |
| 798.303 | C01051 | -1.71 | Uroporphyrinogen III                                                                                |
| 799.204 | C00024 | -3.29 | Acetyl-CoA; Acetyl coenzyme A                                                                       |
| 799.248 | C01944 | -2.53 | Octanoyl-CoA                                                                                        |
| 800.197 | C04405 | -1.7  | (2S,3S)-3-Hydroxy-2-methylbutanoyl-CoA; (S)-3-Hydroxy-2-methylbutyryl-CoA                           |
| 800.258 | C01944 | -1.81 | Octanoyl-CoA                                                                                        |
| 800.314 | C04392 | -1.97 | P1,P4-Bis(5'-xanthosyl) tetraphosphate; XppppX                                                      |
| 801.067 | C04899 | -2.57 | (6S)-6beta-Hydroxy-1,4,5,6-tetrahydronicotinamide-adenine dinucleotide phosphate; (S)-NADPH-hydrate |
| 801.259 | C06198 | -3.9  | P1,P4-Bis(5'-uridyl) tetraphosphate; UppppU                                                         |
| 801.318 | C06198 | -2.8  | P1,P4-Bis(5'-uridyl) tetraphosphate; UppppU                                                         |
| 802.266 | C04392 | -2.24 | P1,P4-Bis(5'-xanthosyl) tetraphosphate; XppppX                                                      |
| 802.324 | C06198 | -4.24 | P1,P4-Bis(5'-uridyl) tetraphosphate; UppppU                                                         |
| 803.26  | C01944 | -2.34 | Octanoyl-CoA                                                                                        |
| 803.32  | C01024 | -2.67 | Hydroxymethylbilane                                                                                 |
| 804.258 | C16470 | -1.75 | 5-Methylhex-4-enoyl-CoA                                                                             |
| 806.258 | C00363 | -2.05 | dTDP; Deoxythymidine 5'-diphosphate                                                                 |
| 807.071 | C00016 | -3.78 | FAD; Flavin adenine dinucleotide                                                                    |
| 808.081 | C00016 | -3.39 | FAD; Flavin adenine dinucleotide                                                                    |
| 808.384 | C00956 | -2.11 | L-2-Amino adipate; L-alpha-Amino adipate; L-alpha-Amino adipic acid; L-2-Amino adipic acid          |
| 810.43  | C00882 | -2.07 | Dephospho-CoA; Dephosphocoenzyme A; 3'-Dephospho-CoA                                                |
| 811.094 | C00016 | -2.35 | FAD; Flavin adenine dinucleotide                                                                    |
| 811.186 | C00100 | -2.65 | Propanoyl-CoA; Propionyl-CoA; Propionyl coenzyme A                                                  |
| 811.292 | C01944 | -2.74 | Octanoyl-CoA                                                                                        |
| 812.178 | C00100 | -2.41 | Propanoyl-CoA; Propionyl-CoA; Propionyl coenzyme A                                                  |
| 812.198 | C00083 | -2.21 | Malonyl-CoA; Malonyl coenzyme A                                                                     |
| 812.293 | C06198 | -2.55 | P1,P4-Bis(5'-uridyl) tetraphosphate; UppppU                                                         |

|         |        |       |                                                                                           |
|---------|--------|-------|-------------------------------------------------------------------------------------------|
| 812.983 | C01024 | -2.99 | Hydroxymethylbilane                                                                       |
| 813.203 | C00024 | -1.69 | Acetyl-CoA; Acetyl coenzyme A                                                             |
| 813.272 | C06198 | -2.3  | P1,P4-Bis(5'-uridyl) tetraphosphate; UppppU                                               |
| 813.969 | C06198 | -2.52 | P1,P4-Bis(5'-uridyl) tetraphosphate; UppppU                                               |
| 814.179 | C00100 | -2.85 | Propanoyl-CoA; Propionyl-CoA; Propionyl coenzyme A                                        |
| 814.199 | C01352 | -1.66 | FADH2                                                                                     |
| 814.971 | C01024 | -2.35 | Hydroxymethylbilane                                                                       |
| 814.988 | C01217 | -2.69 | 5,6,7,8-Tetrahydromethanopterin; H4MPT; THMPT; Tetrahydromethanopterin                    |
| 815.231 | C01944 | -2.73 | Octanoyl-CoA                                                                              |
| 816.18  | C00100 | -2.59 | Propanoyl-CoA; Propionyl-CoA; Propionyl coenzyme A                                        |
| 818.317 | C04377 | -1.7  | 5,10-Methylenetetrahydromethanopterin; N5,N10-Methylenetetrahydromethanopterin            |
| 820.324 | C01051 | -1.93 | Uroporphyrinogen III                                                                      |
| 821.326 | C06198 | -2.33 | P1,P4-Bis(5'-uridyl) tetraphosphate; UppppU                                               |
| 823.32  | C01051 | -1.89 | Uroporphyrinogen III                                                                      |
| 824.045 | C00016 | -3.69 | FAD; Flavin adenine dinucleotide                                                          |
| 824.122 | C00016 | -2.41 | FAD; Flavin adenine dinucleotide                                                          |
| 824.361 | C06198 | -2.38 | P1,P4-Bis(5'-uridyl) tetraphosphate; UppppU                                               |
| 824.455 | C05922 | -2.08 | Formamidopyrimidine nucleoside triphosphate                                               |
| 825.054 | C00083 | -2.58 | Malonyl-CoA; Malonyl coenzyme A                                                           |
| 825.357 | C06198 | -2.92 | P1,P4-Bis(5'-uridyl) tetraphosphate; UppppU                                               |
| 826.055 | C00016 | -3.3  | FAD; Flavin adenine dinucleotide                                                          |
| 826.121 | C00016 | -4.6  | FAD; Flavin adenine dinucleotide                                                          |
| 826.121 | C00016 | -4.73 | FAD; Flavin adenine dinucleotide                                                          |
| 827.052 | C00016 | -2.64 | FAD; Flavin adenine dinucleotide                                                          |
| 827.124 | C00016 | -1.99 | FAD; Flavin adenine dinucleotide                                                          |
| 827.248 | C16470 | -2.3  | 5-Methylhex-4-enoyl-CoA                                                                   |
| 828.06  | C00016 | -3.26 | FAD; Flavin adenine dinucleotide                                                          |
| 828.367 | C01051 | -2.19 | Uroporphyrinogen III                                                                      |
| 829.246 | C01944 | -2.52 | Octanoyl-CoA                                                                              |
| 830.226 | C04377 | -2.01 | 5,10-Methylenetetrahydromethanopterin; N5,N10-Methylenetetrahydromethanopterin            |
| 830.252 | C04405 | -1.98 | (2S,3S)-3-Hydroxy-2-methylbutanoyl-CoA; (S)-3-Hydroxy-2-methylbutyryl-CoA                 |
| 832.386 | C06198 | -2.95 | P1,P4-Bis(5'-uridyl) tetraphosphate; UppppU                                               |
| 833.229 | C00091 | -2.86 | Succinyl-CoA; Succinyl coenzyme A                                                         |
| 833.322 | C01051 | -1.75 | Uroporphyrinogen III                                                                      |
| 834.231 | C01944 | -3.22 | Octanoyl-CoA                                                                              |
| 834.397 | C04377 | -1.67 | 5,10-Methylenetetrahydromethanopterin; N5,N10-Methylenetetrahydromethanopterin            |
| 837.134 | C00024 | -3.15 | Acetyl-CoA; Acetyl coenzyme A                                                             |
| 837.274 | C01051 | -2.16 | Uroporphyrinogen III                                                                      |
| 839.066 | C00024 | -2.82 | Acetyl-CoA; Acetyl coenzyme A                                                             |
| 841.05  | C00294 | -3.49 | Inosine                                                                                   |
| 841.156 | C00136 | -1.89 | Butanoyl-CoA; Butyryl-CoA                                                                 |
| 842.056 | C01352 | -1.68 | FADH2                                                                                     |
| 845.393 | C01051 | -1.92 | Uroporphyrinogen III                                                                      |
| 845.413 | C03263 | -3.16 | Coproporphyrinogen III                                                                    |
| 846.416 | C01024 | -2.21 | Hydroxymethylbilane                                                                       |
| 847.266 | C04392 | -2.13 | P1,P4-Bis(5'-xanthosyl) tetraphosphate; XppppX                                            |
| 848.093 | C00024 | -2.14 | Acetyl-CoA; Acetyl coenzyme A                                                             |
| 849.097 | C00024 | -2.26 | Acetyl-CoA; Acetyl coenzyme A                                                             |
| 849.352 | C04392 | -3.06 | P1,P4-Bis(5'-xanthosyl) tetraphosphate; XppppX                                            |
| 850.107 | C00024 | -2.4  | Acetyl-CoA; Acetyl coenzyme A                                                             |
| 850.22  | C04405 | -2.98 | (2S,3S)-3-Hydroxy-2-methylbutanoyl-CoA; (S)-3-Hydroxy-2-methylbutyryl-CoA                 |
| 852.411 | C04392 | -2.12 | P1,P4-Bis(5'-xanthosyl) tetraphosphate; XppppX                                            |
| 853.254 | C04405 | -1.89 | (2S,3S)-3-Hydroxy-2-methylbutanoyl-CoA; (S)-3-Hydroxy-2-methylbutyryl-CoA                 |
| 853.288 | C01024 | -1.86 | Hydroxymethylbilane                                                                       |
| 853.361 | C01944 | -1.94 | Octanoyl-CoA                                                                              |
| 853.384 | C04392 | -2.47 | P1,P4-Bis(5'-xanthosyl) tetraphosphate; XppppX                                            |
| 854.124 | C00083 | -2.02 | Malonyl-CoA; Malonyl coenzyme A                                                           |
| 854.159 | C01144 | -2.23 | (S)-3-Hydroxybutanoyl-CoA; (S)-3-Hydroxybutyryl-CoA                                       |
| 854.159 | C04047 | -2.61 | 3-Hydroxy-2-methylpropanoyl-CoA; 3-Hydroxy-2-methylpropionyl-CoA; 3-Hydroxyisobutyryl-CoA |
| 854.159 | C05116 | -2.65 | 3-Hydroxybutanoyl-CoA; 3-Hydroxybutyryl-CoA                                               |
| 854.159 | C06000 | -2.9  | (S)-3-Hydroxyisobutyryl-CoA                                                               |
| 854.34  | C04392 | -2.45 | P1,P4-Bis(5'-xanthosyl) tetraphosphate; XppppX                                            |
| 854.383 | C01051 | -2.53 | Uroporphyrinogen III                                                                      |
| 859.267 | C01051 | -1.66 | Uroporphyrinogen III                                                                      |
| 861.201 | C01051 | -3.27 | Uroporphyrinogen III                                                                      |
| 861.279 | C01051 | -1.78 | Uroporphyrinogen III                                                                      |
| 861.362 | C06198 | -2.53 | P1,P4-Bis(5'-uridyl) tetraphosphate; UppppU                                               |
| 862.28  | C04392 | -2.99 | P1,P4-Bis(5'-xanthosyl) tetraphosphate; XppppX                                            |
| 862.349 | C06198 | -2.44 | P1,P4-Bis(5'-uridyl) tetraphosphate; UppppU                                               |
| 862.372 | C01051 | -1.95 | Uroporphyrinogen III                                                                      |
| 862.412 | C01051 | -2.2  | Uroporphyrinogen III                                                                      |
| 862.518 | C01024 | -2.07 | Hydroxymethylbilane                                                                       |
| 863.204 | C01051 | -2.99 | Uroporphyrinogen III                                                                      |
| 863.348 | C01051 | -2.08 | Uroporphyrinogen III                                                                      |
| 863.409 | C01024 | -2.3  | Hydroxymethylbilane                                                                       |
| 863.52  | C01024 | -2.4  | Hydroxymethylbilane                                                                       |
| 864.204 | C16470 | -2.4  | 5-Methylhex-4-enoyl-CoA                                                                   |
| 864.377 | C01051 | -1.82 | Uroporphyrinogen III                                                                      |
| 864.399 | C00016 | -2.39 | FAD; Flavin adenine dinucleotide                                                          |
| 864.421 | C06198 | -2.44 | P1,P4-Bis(5'-uridyl) tetraphosphate; UppppU                                               |
| 864.521 | C01024 | -1.77 | Hydroxymethylbilane                                                                       |
| 865.31  | C01024 | -2.39 | Hydroxymethylbilane                                                                       |
| 865.379 | C00049 | -1.86 | L-Aspartate; L-Aspartic acid; 2-Aminosuccinic acid; L-Asp                                 |

|         |        |       |                                                                                                |
|---------|--------|-------|------------------------------------------------------------------------------------------------|
| 866.204 | C01024 | -1.74 | Hydroxymethylbilane                                                                            |
| 866.314 | C04392 | -2.29 | P1,P4-Bis(5'-xanthosyl) tetraphosphate; XppppX                                                 |
| 866.381 | C06198 | -4.17 | P1,P4-Bis(5'-uridyl) tetraphosphate; UppppU                                                    |
| 867.204 | C01024 | -1.94 | Hydroxymethylbilane                                                                            |
| 867.339 | C01051 | -1.73 | Uroporphyrinogen III                                                                           |
| 867.542 | C16470 | -2.32 | 5-Methylhex-4-enoyl-CoA                                                                        |
| 868.172 | C04405 | -3.16 | (2S,3S)-3-Hydroxy-2-methylbutanoyl-CoA; (S)-3-Hydroxy-2-methylbutyryl-CoA                      |
| 868.172 | C05271 | -2.82 | trans-Hex-2-enoyl-CoA; (2E)-Hexenoyl-CoA                                                       |
| 868.172 | C05998 | -2.94 | 3-Hydroxyisovaleryl-CoA; 3-Hydroxyisovaleryl coenzyme A                                        |
| 868.212 | C04405 | -2.32 | (2S,3S)-3-Hydroxy-2-methylbutanoyl-CoA; (S)-3-Hydroxy-2-methylbutyryl-CoA                      |
| 868.229 | C01944 | -1.93 | Octanoyl-CoA                                                                                   |
| 868.291 | C01024 | -2.22 | Hydroxymethylbilane                                                                            |
| 868.546 | C16471 | -2.94 | 5-Methyl-3-oxo-4-hexenoyl-CoA                                                                  |
| 869.552 | C16471 | -3.75 | 5-Methyl-3-oxo-4-hexenoyl-CoA                                                                  |
| 870.342 | C01051 | -2.8  | Uroporphyrinogen III                                                                           |
| 872.088 | C00024 | -1.66 | Acetyl-CoA; Acetyl coenzyme A                                                                  |
| 872.315 | C01024 | -2.14 | Hydroxymethylbilane                                                                            |
| 873.407 | C01051 | -2.46 | Uroporphyrinogen III                                                                           |
| 874.416 | C06198 | -2.88 | P1,P4-Bis(5'-uridyl) tetraphosphate; UppppU                                                    |
| 875.34  | C01944 | -1.84 | Octanoyl-CoA                                                                                   |
| 876.183 | C16470 | -2.32 | 5-Methylhex-4-enoyl-CoA                                                                        |
| 876.233 | C04405 | -1.69 | (2S,3S)-3-Hydroxy-2-methylbutanoyl-CoA; (S)-3-Hydroxy-2-methylbutyryl-CoA                      |
| 877.239 | C01944 | -2.36 | Octanoyl-CoA                                                                                   |
| 877.273 | C01024 | -1.87 | Hydroxymethylbilane                                                                            |
| 877.329 | C04392 | -2.17 | P1,P4-Bis(5'-xanthosyl) tetraphosphate; XppppX                                                 |
| 877.414 | C06198 | -2.43 | P1,P4-Bis(5'-uridyl) tetraphosphate; UppppU                                                    |
| 878.269 | C01024 | -2    | Hydroxymethylbilane                                                                            |
| 878.336 | C04392 | -2.74 | P1,P4-Bis(5'-xanthosyl) tetraphosphate; XppppX                                                 |
| 879.189 | C05271 | -2.32 | trans-Hex-2-enoyl-CoA; (2E)-Hexenoyl-CoA                                                       |
| 879.189 | C16470 | -2.51 | 5-Methylhex-4-enoyl-CoA                                                                        |
| 880.35  | C01051 | -2.53 | Uroporphyrinogen III                                                                           |
| 881.209 | C01024 | -2.31 | Hydroxymethylbilane                                                                            |
| 882.097 | C00640 | -1.8  | (3S)-3-Hydroxyacyl-CoA; (S)-3-Hydroxyacyl-CoA                                                  |
| 882.097 | C00640 | -1.94 | (3S)-3-Hydroxyacyl-CoA; (S)-3-Hydroxyacyl-CoA                                                  |
| 882.097 | C01086 | -1.66 | (3R)-3-Hydroxyacyl-CoA; (R)-3-Hydroxyacyl-CoA                                                  |
| 882.097 | C01086 | -1.76 | (3R)-3-Hydroxyacyl-CoA; (R)-3-Hydroxyacyl-CoA                                                  |
| 882.097 | C05668 | -2.71 | 3-Hydroxypropionyl-CoA; 3-Hydroxypropionyl coenzyme A; 3-Hydroxypropanoyl-CoA                  |
| 882.097 | C05668 | -2.77 | 3-Hydroxypropionyl-CoA; 3-Hydroxypropionyl coenzyme A; 3-Hydroxypropanoyl-CoA                  |
| 882.162 | C16470 | -2.64 | 5-Methylhex-4-enoyl-CoA                                                                        |
| 882.204 | C01944 | -2.72 | Octanoyl-CoA                                                                                   |
| 882.425 | C01051 | -2.26 | Uroporphyrinogen III                                                                           |
| 883.319 | C01024 | -1.67 | Hydroxymethylbilane                                                                            |
| 884.213 | C01051 | -1.77 | Uroporphyrinogen III                                                                           |
| 885.185 | C05271 | -2.07 | trans-Hex-2-enoyl-CoA; (2E)-Hexenoyl-CoA                                                       |
| 887.565 | C01217 | -2.18 | 5,6,7,8-Tetrahydromethanopterin; H4MPT; THMPT; Tetrahydromethanopterin                         |
| 888.101 | C01352 | -1.69 | FADH2                                                                                          |
| 888.158 | C05271 | -1.72 | trans-Hex-2-enoyl-CoA; (2E)-Hexenoyl-CoA                                                       |
| 888.31  | C04392 | -2.96 | P1,P4-Bis(5'-xanthosyl) tetraphosphate; XppppX                                                 |
| 889.136 | C00136 | -3.15 | Butanoyl-CoA; Butyryl-CoA                                                                      |
| 889.136 | C03344 | -2.76 | 2-Methylacetoacetyl-CoA; 2-Methyl-3-acetoacetyl-CoA                                            |
| 889.181 | C04405 | -1.66 | (2S,3S)-3-Hydroxy-2-methylbutanoyl-CoA; (S)-3-Hydroxy-2-methylbutyryl-CoA                      |
| 889.532 | C01024 | -3.47 | Hydroxymethylbilane                                                                            |
| 890.326 | C01944 | -1.98 | Octanoyl-CoA                                                                                   |
| 891.119 | C02557 | -1.74 | Methylmalonyl-CoA; Methylmalonyl coenzyme A; 2-Methylmalonyl-CoA                               |
| 891.119 | C02557 | -1.88 | Methylmalonyl-CoA; Methylmalonyl coenzyme A; 2-Methylmalonyl-CoA                               |
| 891.119 | C03069 | -1.66 | 3-Methylcrotonyl-CoA; 3-Methylbut-2-enoyl-CoA; 3-Methylcrotonoyl-CoA; Dimethylacryloyl-CoA     |
| 891.119 | C03069 | -1.82 | 3-Methylcrotonyl-CoA; 3-Methylbut-2-enoyl-CoA; 3-Methylcrotonoyl-CoA; Dimethylacryloyl-CoA     |
| 891.119 | C03069 | -1.9  | 3-Methylcrotonyl-CoA; 3-Methylbut-2-enoyl-CoA; 3-Methylcrotonoyl-CoA; Dimethylacryloyl-CoA     |
| 891.119 | C03345 | -2.08 | 2-Methylbut-2-enoyl-CoA; trans-2-Methylbut-2-enoyl-CoA; Tiglyl-CoA; (E)-2-Methylcrotonoyl-CoA; |
| 891.119 | C03345 | -2.25 | 2-Methylbut-2-enoyl-CoA; trans-2-Methylbut-2-enoyl-CoA; Tiglyl-CoA; (E)-2-Methylcrotonoyl-CoA; |
| 891.119 | C03345 | -2.26 | 2-Methylbut-2-enoyl-CoA; trans-2-Methylbut-2-enoyl-CoA; Tiglyl-CoA; (E)-2-Methylcrotonoyl-CoA; |
| 891.119 | C16470 | -1.88 | 5-Methylhex-4-enoyl-CoA                                                                        |
| 891.131 | C16471 | -1.65 | 5-Methyl-3-oxo-4-hexenoyl-CoA                                                                  |
| 891.319 | C04392 | -2.69 | P1,P4-Bis(5'-xanthosyl) tetraphosphate; XppppX                                                 |
| 891.389 | C00049 | -1.77 | L-Aspartate; L-Aspartic acid; 2-Aminosuccinic acid; L-Asp                                      |
| 892.179 | C00136 | -1.74 | Butanoyl-CoA; Butyryl-CoA                                                                      |
| 892.179 | C16471 | -1.84 | 5-Methyl-3-oxo-4-hexenoyl-CoA                                                                  |
| 892.247 | C04405 | -1.74 | (2S,3S)-3-Hydroxy-2-methylbutanoyl-CoA; (S)-3-Hydroxy-2-methylbutyryl-CoA                      |
| 892.311 | C04392 | -2.24 | P1,P4-Bis(5'-xanthosyl) tetraphosphate; XppppX                                                 |
| 892.392 | C04377 | -1.96 | 5,10-Methylenetetrahydromethanopterin; N5,N10-Methylenetetrahydromethanopterin                 |
| 892.992 | C04392 | -1.89 | P1,P4-Bis(5'-xanthosyl) tetraphosphate; XppppX                                                 |
| 893.139 | C04405 | -1.7  | (2S,3S)-3-Hydroxy-2-methylbutanoyl-CoA; (S)-3-Hydroxy-2-methylbutyryl-CoA                      |
| 893.303 | C04392 | -3.3  | P1,P4-Bis(5'-xanthosyl) tetraphosphate; XppppX                                                 |
| 893.394 | C06198 | -2.78 | P1,P4-Bis(5'-uridyl) tetraphosphate; UppppU                                                    |
| 893.558 | C01944 | -3.7  | Octanoyl-CoA                                                                                   |
| 894.228 | C04405 | -1.84 | (2S,3S)-3-Hydroxy-2-methylbutanoyl-CoA; (S)-3-Hydroxy-2-methylbutyryl-CoA                      |
| 894.301 | C01944 | -2.21 | Octanoyl-CoA                                                                                   |
| 894.35  | C04392 | -1.75 | P1,P4-Bis(5'-xanthosyl) tetraphosphate; XppppX                                                 |
| 895.302 | C01944 | -2.54 | Octanoyl-CoA                                                                                   |
| 895.355 | C01944 | -2.25 | Octanoyl-CoA                                                                                   |
| 895.562 | C00100 | -4.56 | Propanoyl-CoA; Propionyl-CoA; Propionyl coenzyme A                                             |
| 896.229 | C01944 | -1.96 | Octanoyl-CoA                                                                                   |
| 896.304 | C01024 | -1.79 | Hydroxymethylbilane                                                                            |

|         |        |       |                                                |
|---------|--------|-------|------------------------------------------------|
| 897.388 | C06198 | -3.34 | P1,P4-Bis(5'-uridylyl) tetraphosphate; UppppU  |
| 898.154 | C01051 | -3.29 | Uroporphyrinogen III                           |
| 899.158 | C05271 | -3.06 | trans-Hex-2-enoyl-CoA; (2E)-Hexenoyl-CoA       |
| 899.3   | C04392 | -2.79 | P1,P4-Bis(5'-xanthosyl) tetraphosphate; XppppX |

---
